# Supplementary material for: Metal-free stereoselective annulation of quinolines with trifluoroacetylacetylenes and water: an access to fluorinated oxazinoquinolines
Source: Royal Society of Chemistry journal article supplement (doi:10.1039/c7cc09725e), 2018-01-01
Supplement: c7cc09725e1.pdf [file c7cc09725e1.pdf]

## Supporting Information

# Metal-free stereoselective annulation of quinolines with trifluoroacetylacetylenes and water: an access to fluorinated oxazinoquinolines

B. A. Trofimov,<sup>a,\*</sup> K. V. Belyaeva,<sup>a</sup> L. P. Nikitina,<sup>a</sup> A. V. Afonin,<sup>a</sup> A. V. Vashchenko,<sup>a</sup> V. M. Muzalevskiy<sup>b</sup> and V. G. Nenajdenko<sup>b,\*</sup>

<sup>a</sup> *A. E. Favorsky Irkutsk Institute of Chemistry, Siberian Branch, Russian Academy of Sciences, 1 Favorsky Str., Irkutsk, 664033 Russian Federation;*

<sup>b</sup> *M. V. Lomonosov Moscow State University, Department of Chemistry, Leninskie Gory 1, Moscow, 119991 Russian Federation*

E-mail: [boris\\_trofimov@irioch.irk.ru](mailto:boris_trofimov@irioch.irk.ru); [nenajdenko@org.chem.msu.ru](mailto:nenajdenko@org.chem.msu.ru)

### Table of contents

|                                                                                         |                |
|-----------------------------------------------------------------------------------------|----------------|
| <b>General Remarks</b>                                                                  | <b>S2</b>      |
| <b>Reaction of quinolines, trifluoroacetylacetylenes and water (general procedure )</b> | <b>S2-S3</b>   |
| <b>Characterization data of all compounds</b>                                           | <b>S3-S18</b>  |
| <b>Synthesis of 1,8-naphthyridine 6.....</b>                                            | <b>S18</b>     |
| <b>Copies of all NMR spectra</b>                                                        | <b>S19-S50</b> |
| <b>Monitoring of the reaction mixture by <sup>19</sup>F NMR spectrum.....</b>           | <b>S51</b>     |
| <b>X-ray diffraction structural analysis data</b>                                       | <b>S52-S58</b> |

**General methods.** NMR spectra were recorded on a Bruker DPX-400 spectrometer (400.1 MHz for  $^1\text{H}$  and 100.6 MHz for  $^{13}\text{C}$ ) and AV-400 spectrometers (40.5 MHz for  $^{15}\text{N}$  and 376.5 MHz for  $^{19}\text{F}$ ) in  $\text{CDCl}_3$  and  $\text{CD}_3\text{CN}$ . The internal standards were HMDS (for  $^1\text{H}$  nuclei  $\delta$  0.05 ppm) or the residual solvent signals (for  $^{13}\text{C}$  nuclei  $\delta$  77.16 ppm),  $\text{CH}_3\text{NO}_2$  (for  $^{15}\text{N}$  nuclei  $\delta$  0.0 ppm) and  $\text{CFCl}_3$  (for  $^{19}\text{F}$  nuclei  $\delta$  0.00 ppm) or  $\text{C}_6\text{F}_6$  (for  $^{19}\text{F}$  nuclei  $\delta$  -162.90 ppm). IR spectra were recorded on a two-beam Bruker Vertex 70 spectrometer. Elemental analysis was carried out on a FLASH EA 1112 Series analyzer. Melting points were determined on a Kofler hot stage apparatus. Commercial samples of quinolines **1a-g** and isoquinoline **4** were used. 1,8-Naphthyridine **6** was prepared according to method (M. Balkenhohl, R. Greiner, I. S. Makarov, B. Heinz, K. Karaghiosoff, H. Zipse, P. Knochel, *Chem. - A Eur. J.*, **2017**, *23*, 13046-13050). Samples of aryl(trifluoroacetyl)acetylenes **2a-i** were obtained according to method (V. M. Muzalevskiy, A. Yu. Rulev, A. R. Romanov, E. V. Kondrashov, I. A. Ushakov, V. A. Chertkov, V. G. Nenajdenko. *J. Org. Chem.* **2017**, *82*, 7200–7214). Monitoring of the reaction course was carried out by IR spectroscopy following the disappearance of the absorption band of the  $\text{C}\equiv\text{C}$  bond in starting acetylene **2** at 2174-2202  $\text{cm}^{-1}$  or using  $^{19}\text{F}$  NMR. The products **3a-o**, **5** and **7** were separated and purified by column chromatography. Column and thin-layer chromatography were carried out on silica gel (0.06-0.2 mm) with chloroform/benzene/ethanol (20:4:1) mixture as eluent or silica gel which was treated with  $\text{NEt}_3$  (about 3-5 weight %) with  $\text{CH}_2\text{Cl}_2$ , and mixtures of  $\text{CH}_2\text{Cl}_2$  and MeOH (300:1, 150:1, 100:1, 40:1) as eluent. Solvents effect (on the example of reaction between quinoline **1a**, phenyltrifluoroacetylacetylene **2a** and water) effected on the reaction times and yield of oxazinoquinoline **3a** is demonstrated in the Table S1.

**Table S1** Solvent effect on the reaction times and yield of oxazinoquinoline **3a**<sup>a</sup>

| Entry | Solvent                     | Time (h) | Yield of <b>3a</b> (%) <sup>b</sup> |
|-------|-----------------------------|----------|-------------------------------------|
| 1     | MeCN                        | 20       | 91                                  |
| 2     | DMF                         | 84       | 74                                  |
| 3     | DMSO                        | 84       | 86                                  |
| 4     | THF                         | 84       | 60                                  |
| 5     | 1,2-DCE                     | 84       | 86                                  |
| 6     | $\text{Et}_2\text{O}$       | 84       | 88                                  |
| 7     | PhMe                        | 84       | 88                                  |
| 8     | $\text{CH}_2\text{Cl}_2$    | 84       | 83                                  |
| 9     | $\text{NEt}_3$ <sup>c</sup> | 84       | 9                                   |
| 10    | EtOAc                       | 84       | 87                                  |

<sup>a</sup> Conditions: quinoline **1a** (0.475 mmol) and phenyltrifluoroacetylacetylene **2a** (0.5 mmol),  $\text{H}_2\text{O}$  (0.5 mmol), Solvent (3 mL), temperature -18 ...+25 °C. <sup>b</sup>  $^{19}\text{F}$  NMR yield. <sup>c</sup> Conversion 66%.

**Reaction of quinolines, trifluoroacetylacetylenes and water (general procedure for pure isomers, procedure I):** Solution of quinoline **1** (0.475 mmol, 0.95 equiv.) in MeCN (1.5 mL) and solution of acetylene **2** (0.5 mmol, 1 equiv.) and  $\text{H}_2\text{O}$  (0.009 g, 0.5 mmol, 1 equiv.) in MeCN (1.5 mL) were cooled in the fridge (-18 °C) and then mixed in 4 mL vial with a screw cap. The reaction mixture

was left at room temperature for appropriate time (TLC or  $^{19}\text{F}$  NMR control). The solvent was removed under reduced pressure, the residue was purified by column chromatography on silica gel which was treated with  $\text{NEt}_3$  (about 3-5 weight %) to prevent acid catalyzed isomerization.  $\text{CH}_2\text{Cl}_2$ , and mixtures of  $\text{CH}_2\text{Cl}_2$  and  $\text{MeOH}$  (300:1, 150:1, 100:1, 40:1) were consistently used as eluents. Solvents were evaporated in vacuo, the rest amount of the solvents and  $\text{NEt}_3$  were removed by co-evaporation with  $\text{MeCN}$  (1 mL, 2-3 times) to give pure ( $3R^*,4aR^*$ )-isomers of **3**. The residue thus obtained solidifies at standing during several hours at room temperature. Alternatively compounds **3** can be crystallized by evaporation of solutions in  $\text{Et}_2\text{O}$ -Hexane (1:3-1:5). Diastereomer ratio of 1,3-oxazinoquinolines **3** appeared to be capable of changing in the presence of acids. To avoid isomerization NMR spectra were measured from solution in  $\text{CD}_3\text{CN}$  with traces of  $\text{NEt}_3$  intentionally added.

**Reaction of quinolines, trifluoroacetylenes and water (general procedure for synthesis of the mixture of isomers, procedure II):** To the mixture of acetylene **2** (0.5 mmol) and  $\text{H}_2\text{O}$  (0.009 g, 0.5 mmol) in 1.5 mL  $\text{MeCN}$  at  $-5\sim 0^\circ\text{C}$  with stirring the solution of quinoline **1** (0.5 mmol) in 1.5 mL  $\text{MeCN}$  was added slowly (during 0.5 h) by drops. After that reaction mixture was warmed to the room temperature and stirred appropriate time. The solvent was removed under reduced pressure. The reaction mixture was passed through a column (chloroform/benzene/ethanol (20:4:1) mixture as an eluent) to give a mixture of ( $3R^*,4aR^*$ )- and ( $3S^*,4aR^*$ )-diastereomers of 1,3-oxazinoquinoline **3**. Formation of ( $3S^*,4aR^*$ )-diastereomer is a result of acid catalyzed isomerization of ( $3R^*,4aR^*$ )-diastereomer on silica gel.

**( $3R^*,4aR^*$ )-1-Phenyl-3-(trifluoromethyl)-3*H*,4*aH*-[1,3]oxazino[3,2-*a*]-quinolin-3-ol (**3a**).** Obtained

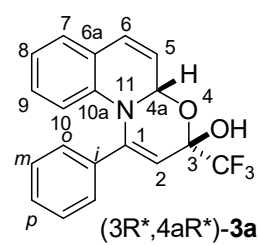

from quinoline **1a** (0.061 g, 0.475 mmol), acetylene **2a** (0.099 g, 0.5 mmol) and  $\text{H}_2\text{O}$  (0.009 g, 0.5 mmol) by procedure I keeping the reaction mixture for 20 h. White needles, m.p.  $155\text{-}157^\circ\text{C}$  (hexane), yield 0.148 g (90%).

$^1\text{H}$  NMR (400.1 MHz,  $\text{CD}_3\text{CN}$ ):  $\delta$  7.56-7.54 (m, 2H,  $H_o$  from Ph), 7.39-7.47 (m, 3H,  $H_{m,p}$  from Ph), 7.24 (dd,  $^3J = 7.3$  Hz,  $^4J = 1.7$  Hz, 1H, H-7), 7.00 (d,  $^3J_{5,6} = 9.7$  Hz, 1H, H-6), 6.90 (td,  $^3J = 7.6$  Hz,  $^4J = 1.7$  Hz, 1H, H-9), 6.85 (td,  $^3J = 7.3$  Hz,  $^4J = 1.3$  Hz, 1H, H-8), 6.29 (d,  $^3J = 7.9$  Hz, 1H, H-10), 6.10 (dd,  $^3J_{5,6} = 9.7$  Hz,  $^3J_{4a,5} = 4.8$  Hz, 1H, H-5), 6.01 (s, 1H, H-2), 5.63 (d,  $^3J_{4a,5} = 4.9$  Hz, 1H, H-4a), 5.34 (s, 1H, OH) ppm.

$^{13}\text{C}$  NMR (100.6 MHz,  $\text{CDCl}_3$ ):  $\delta$  148.4 (C-1), 137.1 (C-10a), 134.6 ( $C_i$  from Ph), 130.5 (C-6), 130.1 ( $C_p$  from Ph), 129.2 ( $C_m$  from Ph), 129.0 (C-9), 128.0 (C-7), 126.6 ( $C_o$  from Ph), 122.4 (q,  $^1J_{\text{CF}} = 286.1$  Hz,  $\text{CF}_3$ ), 121.4 (C-6a), 120.8 (C-8), 117.6 (C-10), 117.5 (C-5), 110.4 (C-2), 92.3 (q,  $^2J_{\text{CF}} = 33.0$  Hz, C-3), 78.3 (C-4a) ppm.

$^{19}\text{F}$  NMR (376.3 MHz,  $\text{CD}_3\text{CN}$ ):  $\delta$  -82.2 ( $\text{CF}_3$ ) ppm.

HRMS (ESI-TOF):  $m/z$   $[\text{M}-\text{OH}]^+$  Calcd for  $\text{C}_{19}\text{H}_{13}\text{F}_3\text{NO}^+$ : 328.0944; found: 328.0945;  $m/z$   $[\text{M}+\text{H}]^+$  Calcd for  $\text{C}_{19}\text{H}_{15}\text{F}_3\text{NO}_2^+$ : 346.1049; found: 346.1048.

**(3R\*,4aR\*)-1-(4-methylphenyl)-3-(trifluoromethyl)-3H,4aH-[1,3]oxazino[3,2-a]quinolin-3-ol (3b)**

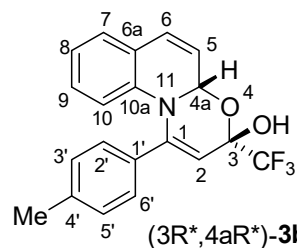

Pure (3R\*,4aR\*)-3b obtained from quinoline 1a (0.061 g, 0.475 mmol), acetylene 2b (0.106 g, 0.5 mmol) and H<sub>2</sub>O (0.009 g, 0.5 mmol) by procedure I keeping the reaction mixture for 15 h. Light-brown needles, m.p. 133-135 °C (MeCN), R<sub>F</sub>(CH<sub>2</sub>Cl<sub>2</sub>-MeOH 100:1) = 0.27, yield 0.154 g (90%).

<sup>1</sup>H NMR (400.1 MHz, CD<sub>3</sub>CN): δ 7.43 (d, <sup>3</sup>J = 8.2 Hz, 2H, H-2',6'), 7.24 (dd, <sup>3</sup>J = 7.1 Hz, <sup>4</sup>J = 1.9 Hz, 1H, H-7), 7.22 (d, <sup>3</sup>J = 8.2 Hz, 2H, H-3',5'), 6.99 (d, <sup>3</sup>J<sub>5,6</sub> = 9.8 Hz, 1H, H-6), 6.89 (td, <sup>3</sup>J = 7.4 Hz, <sup>4</sup>J = 2.0 Hz, 1H, H-9), 6.85 (td, <sup>3</sup>J = 7.3 Hz, <sup>4</sup>J = 1.4 Hz, 1H, H-8), 6.33 (d, <sup>3</sup>J = 7.6 Hz, 1H, H-10), 6.11 (dd, <sup>3</sup>J<sub>5,6</sub> = 9.7 Hz, <sup>3</sup>J<sub>4a,5</sub> = 4.8 Hz, 1H, H-5), 5.97 (s, 1H, H-2), 5.65 (d, <sup>3</sup>J = 4.8 Hz, 1H, H-4a), 5.46 (br s, 1H, OH), 2.35 (s, 3H, Me) ppm.

<sup>13</sup>C NMR (100.6 MHz, CD<sub>3</sub>CN): δ 148.6 (C-1), 141.2, 138.3, 132.8, 130.7, 130.4, 129.4, 128.8, 127.2, 123.6 (q, <sup>1</sup>J<sub>CF</sub> = 285.3 Hz, CF<sub>3</sub>), 122.5, 121.4, 119.3, 118.0, 111.9 (C-2), 93.0 (q, <sup>2</sup>J<sub>CF</sub> = 32.8 Hz, C-3), 78.4 (C-4a), 21.3 (Me) ppm.

<sup>19</sup>F NMR (376.3 MHz, CD<sub>3</sub>CN): δ -82.3 (CF<sub>3</sub>) ppm.

HRMS (ESI-TOF): m/z [M-OH]<sup>+</sup> Calcd for C<sub>20</sub>H<sub>15</sub>F<sub>3</sub>NO<sup>+</sup>: 342.1100; found: 342.1106; m/z [M+H]<sup>+</sup> Calcd for C<sub>20</sub>H<sub>17</sub>F<sub>3</sub>NO<sub>2</sub><sup>+</sup>: 360.1206; found: 360.1205.

**(3R\*,4aR\*)-1-(3,4-dimethylphenyl)-3-(trifluoromethyl)-3H,4aH-[1,3]oxazino[3,2-a]quinolin-3-ol (3c)**

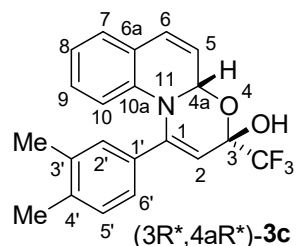

(3c). Obtained from quinoline 1a (0.061 g, 0.475 mmol), acetylene 2c (0.113 g, 0.5 mmol) and H<sub>2</sub>O (0.009 g, 0.5 mmol) by procedure I keeping the reaction mixture for 24 h. Light-brown needles, m.p. 94-96 °C (MeCN), R<sub>F</sub>(CH<sub>2</sub>Cl<sub>2</sub>-MeOH 100:1) = 0.30, yield 0.171 g (97%).

<sup>1</sup>H NMR (400.1 MHz, CD<sub>3</sub>CN): δ 7.35 (s, 1H, H-2'), 7.22-7.24 (m, 2H, H-7, H-6'), 7.16 (d, <sup>3</sup>J = 7.9 Hz, 1H, H-5'), 6.99 (d, <sup>3</sup>J<sub>5,6</sub> = 9.7 Hz, 1H, H-6), 6.89 (td, <sup>3</sup>J = 7.4 Hz, <sup>4</sup>J = 1.7 Hz, 1H, H-9), 6.84 (td, <sup>3</sup>J = 7.3 Hz, <sup>4</sup>J = 1.3 Hz, 1H, H-8), 6.35 (d, <sup>3</sup>J = 7.9 Hz, 1H, H-10), 6.10 (dd, <sup>3</sup>J<sub>5,6</sub> = 9.7 Hz, <sup>3</sup>J<sub>4a,5</sub> = 4.9 Hz, 1H, H-5), 5.95 (s, 1H, H-2), 5.62 (d, <sup>3</sup>J<sub>4a,5</sub> = 4.8 Hz, 1H, H-4a), 5.45 (br s, 1H, OH), 2.27 (s, 3H, Me), 2.24 (s, 3H, Me) ppm.

<sup>13</sup>C NMR (100.6 MHz, CD<sub>3</sub>CN): δ 148.7 (C-1), 139.8, 138.6, 138.4, 133.3, 131.1, 130.4, 129.4, 128.7, 128.2, 124.8, 123.6 (q, <sup>1</sup>J<sub>CF</sub> = 285.3 Hz, CF<sub>3</sub>), 122.5, 121.4, 119.3, 118.0, 111.8 (C-2), 93.0 (q, <sup>2</sup>J<sub>CF</sub> = 32.8 Hz, C-3), 78.4 (C-4a), 19.7 (Me), 19.6 (Me) ppm.

<sup>19</sup>F NMR (376.3 MHz, CD<sub>3</sub>CN): δ -82.3 (CF<sub>3</sub>) ppm.

HRMS (ESI-TOF): m/z [M-OH]<sup>+</sup> Calcd for C<sub>21</sub>H<sub>17</sub>F<sub>3</sub>NO<sup>+</sup>: 356.1257; found: 356.1260; m/z [M+H]<sup>+</sup> Calcd for C<sub>21</sub>H<sub>19</sub>F<sub>3</sub>NO<sub>2</sub><sup>+</sup>: 374.1362; found: 374.1362.

**(3R\*,4aR\*)-1-(4-(*tert*-Butyl)phenyl)-3-(trifluoromethyl)-3H,4aH-[1,3]oxazino[3,2-*a*]quinolin-3-ol**

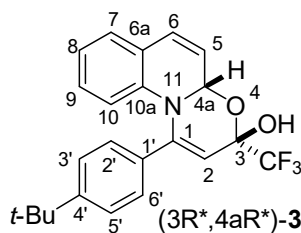

**(3R\*,4aR\*)-3d** <sup>1</sup>H NMR (400.1 MHz, CD<sub>3</sub>CN): δ 7.43-7.48 (m, 4H, H-2',3',5',6'), 7.24 (dd, <sup>3</sup>*J* = 7.2 Hz, <sup>4</sup>*J* = 1.7 Hz, 1H, H-7), 7.00 (d, <sup>3</sup>*J*<sub>5,6</sub> = 9.8 Hz, 1H, H-6), 6.89 (td, <sup>3</sup>*J* = 7.5 Hz, <sup>4</sup>*J* = 1.7 Hz, 1H, H-9), 6.85 (td, <sup>3</sup>*J* = 7.3 Hz, <sup>4</sup>*J* = 1.2 Hz, 1H, H-8), 6.32 (d, <sup>3</sup>*J* = 7.9 Hz, 1H, H-10), 6.10 (dd, <sup>3</sup>*J*<sub>5,6</sub> = 9.8 Hz, <sup>3</sup>*J*<sub>4a,5</sub> = 4.8 Hz, 1H, H-5), 5.98 (s, 1H, H-2), 5.63 (d, <sup>3</sup>*J*<sub>4a,5</sub> = 4.8 Hz, 1H, H-4a), 5.44 (s, 1H, OH), 1.31 (s, 9H, 3Me from *t*-Bu) ppm.

<sup>13</sup>C NMR (100.6 MHz, CD<sub>3</sub>CN): δ 154.3, 148.4 (C-1), 138.4, 132.8, 130.4, 129.5, 128.8, 127.0 (C<sub>2',6'</sub> and C<sub>3',5'</sub> from Ar), 123.6 (q, <sup>1</sup>*J*<sub>CF</sub> = 284.9 Hz, CF<sub>3</sub>), 122.5, 121.5, 119.3, 118.0, 112.2 (C-2), 93.0 (q, <sup>2</sup>*J*<sub>CF</sub> = 33.2 Hz, C-3), 78.4 (C-4a), 35.3 (C from *t*-Bu), 31.4 (3Me from *t*-Bu) ppm.

<sup>19</sup>F NMR (376.3 MHz, CD<sub>3</sub>CN): δ -81.9 (CF<sub>3</sub>) ppm.

HRMS (ESI-TOF): *m/z* [M-OH]<sup>+</sup> Calcd for C<sub>23</sub>H<sub>21</sub>F<sub>3</sub>NO<sup>+</sup>: 384.1570; found: 384.1573; *m/z* [M+H]<sup>+</sup> Calcd for C<sub>23</sub>H<sub>23</sub>F<sub>3</sub>NO<sub>2</sub><sup>+</sup>: 402.1675; found: 402.1676.

C<sub>23</sub>H<sub>22</sub>F<sub>3</sub>NO<sub>2</sub> (401.43): calcd C, 68.82; H, 5.52; N, 3.49; F, 14.20. Found: C, 68.47; H, 5.53; N, 3.15; F, 13.99.

**(3R\*,4aR\*)-1-(4-Methoxyphenyl)-3-(trifluoromethyl)-3H,4aH-[1,3]-oxazino[3,2-*a*]quinolin-3-ol (3e).**

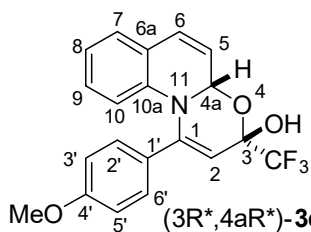

**(3R\*,4aR\*)-3e** <sup>1</sup>H NMR (400.1 MHz, CD<sub>3</sub>CN): δ 7.47 (d, <sup>3</sup>*J* = 8.9 Hz, 2H, H-2',6'), 7.24 (dd, <sup>3</sup>*J* = 7.3 Hz, <sup>4</sup>*J* = 1.6 Hz, 1H, H-7), 7.00 (d, <sup>3</sup>*J*<sub>5,6</sub> = 9.7 Hz, 1H, H-6), 6.93 (d, <sup>3</sup>*J* = 8.9 Hz, 2H, H-3',5'), 6.90 (td, <sup>3</sup>*J* = 7.9 Hz, <sup>4</sup>*J* = 1.8 Hz, 1H, H-9), 6.85 (td, <sup>3</sup>*J* = 7.3 Hz, <sup>4</sup>*J* = 1.1 Hz, 1H, H-8), 6.36 (d, <sup>3</sup>*J* = 8.0 Hz, 1H, H-10), 6.10 (dd, <sup>3</sup>*J*<sub>5,6</sub> = 9.7 Hz, <sup>3</sup>*J*<sub>4a,5</sub> = 4.8 Hz, 1H, H-5), 5.94 (s, 1H, H-2), 5.64 (d, <sup>3</sup>*J*<sub>4a,5</sub> = 3.4 Hz, 1H, H-4a), 5.55 (br s, 1H, OH), 3.79 (s, 3H, OMe) ppm.

<sup>13</sup>C NMR (100.6 MHz, CD<sub>3</sub>CN): δ 162.0 (C-4'), 148.2 (C-1), 138.4, 130.4, 129.5, 128.7, 127.9, 123.6 (q, <sup>1</sup>*J*<sub>CF</sub> = 284.9 Hz, CF<sub>3</sub>), 122.5, 121.4, 119.3, 118.2, 118.1, 115.3, 110.9 (C-2), 93.0 (q, <sup>2</sup>*J*<sub>CF</sub> = 32.4 Hz, C-3), 78.3 (C-4a), 55.9 (OMe) ppm.

<sup>19</sup>F NMR (376.3 MHz, CD<sub>3</sub>CN): δ -82.0 (CF<sub>3</sub>) ppm.

HRMS (ESI-TOF): *m/z* [M-OH]<sup>+</sup> Calcd for C<sub>20</sub>H<sub>15</sub>F<sub>3</sub>NO<sub>2</sub><sup>+</sup>: 358.1049; found: 358.1053; *m/z* [M+H]<sup>+</sup> Calcd for C<sub>20</sub>H<sub>17</sub>F<sub>3</sub>NO<sub>3</sub><sup>+</sup>: 376.1155; found: 376.1153.

C<sub>20</sub>H<sub>16</sub>F<sub>3</sub>NO<sub>3</sub> (375.34): calcd C, 64.00; H, 4.30; N, 3.73; F, 15.18. Found: C, 64.07; H, 4.39; N, 3.62; F, 14.78.

**(3R\*,4aR\*)-1-[4-(Methylthio)phenyl]-3-(trifluoromethyl)-3H,4aH-[1,3]oxazino[3,2-a]quinolin-3-ol**

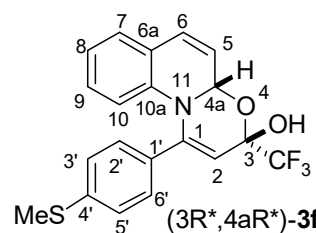

**(3R\*,4aR\*)-3f** <sup>1</sup>H NMR (400.1 MHz, CD<sub>3</sub>CN): δ 7.44 (d, <sup>3</sup>J = 8.5 Hz, 2H, H-2',6'), 7.21-7.25 (m, 3H, H-7, H-3',5'), 6.99 (d, <sup>3</sup>J<sub>5,6</sub> = 9.8 Hz, 1H, H-6), 6.90 (td, <sup>3</sup>J = 7.5 Hz, <sup>4</sup>J = 1.7 Hz, 1H, H-9), 6.85 (td, <sup>3</sup>J = 7.2 Hz, <sup>4</sup>J = 1.1 Hz, 1H, H-8), 6.34 (d, <sup>3</sup>J = 7.9 Hz, 1H, H-10), 6.11 (dd, <sup>3</sup>J<sub>5,6</sub> = 9.8 Hz, <sup>3</sup>J<sub>4a,5</sub> = 4.9 Hz, 1H, H-5), 6.01 (s, 1H, H-2), 5.64 (d, <sup>3</sup>J<sub>4a,5</sub> = 4.6 Hz, 1H, H-4a), 5.60 (br s, 1H, OH), 2.45 (s, 3H, MeS) ppm.

<sup>13</sup>C NMR (100.6 MHz, CD<sub>3</sub>CN): δ 148.0 (C-1), 142.3, 138.2, 131.8, 130.4, 129.5, 128.8, 127.7, 126.8, 123.6 (q, <sup>1</sup>J<sub>CF</sub> = 285.3 Hz, CF<sub>3</sub>), 122.5, 121.5, 119.3, 118.0, 112.0 (C-2), 93.0 (q, <sup>2</sup>J<sub>CF</sub> = 32.8 Hz, C-3), 78.4(C-4a), 15.0 (SMe) ppm.

<sup>19</sup>F NMR (376.3 MHz, CD<sub>3</sub>CN): δ -82.2 (CF<sub>3</sub>) ppm.

HRMS (ESI-TOF): m/z [M-OH]<sup>+</sup> Calcd for C<sub>20</sub>H<sub>15</sub>F<sub>3</sub>NOS<sup>+</sup>: 374.0821; found: 374.0823; m/z [M+H]<sup>+</sup> Calcd for C<sub>20</sub>H<sub>17</sub>F<sub>3</sub>NO<sub>2</sub>S<sup>+</sup>: 392.0927; found: 392.0926.

**(3R\*,4aR\*)-1-(4-Chlorophenyl)-3-(trifluoromethyl)-3H,4aH-[1,3]oxazino[3,2-a]quinolin-3-ol (3g).**

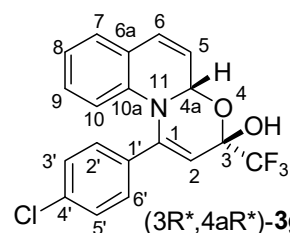

**(3R\*,4aR\*)-3g** <sup>1</sup>H NMR (400.1 MHz, CD<sub>3</sub>CN): δ 7.52 (d, <sup>3</sup>J = 8.6 Hz, 2H, H-2',6'), 7.40 (d, <sup>3</sup>J = 8.6 Hz, 2H, H-3',5'), 7.24 (dd, <sup>3</sup>J = 7.3 Hz, <sup>4</sup>J = 1.7 Hz, 1H, H-7), 7.00 (d, <sup>3</sup>J<sub>5,6</sub> = 9.7 Hz, 1H, H-6), 6.91 (td, <sup>3</sup>J = 7.4 Hz, <sup>4</sup>J = 2.0 Hz, 1H, H-9), 6.86 (td, <sup>3</sup>J = 7.2 Hz, <sup>4</sup>J = 1.1 Hz, 1H, H-8), 6.29 (d, <sup>3</sup>J = 8.0 Hz, 1H, H-10), 6.11 (dd, <sup>3</sup>J<sub>5,6</sub> = 9.7 Hz, <sup>3</sup>J<sub>4a,5</sub> = 4.8 Hz, 1H, H-5), 6.06 (s, 1H, H-2), 5.64 (d, <sup>3</sup>J = 4.7 Hz, 1H, H-4a), 5.60 (br s, 1H, OH) ppm.

<sup>13</sup>C NMR (100.6 MHz, CD<sub>3</sub>CN): δ 147.4 (C-1), 138.0, 136.1, 134.3, 130.4, 130.1, 129.6, 128.92, 128.86, 123.5 (q, <sup>1</sup>J<sub>CF</sub> = 285.3 Hz, CF<sub>3</sub>), 122.5, 121.7, 119.3, 118.0, 113.3 (C-2), 92.9 (q, <sup>2</sup>J<sub>CF</sub> = 32.8 Hz, C-3), 78.4 (C-4a) ppm.

<sup>19</sup>F NMR (376.3 MHz, CD<sub>3</sub>CN): δ -81.9 (CF<sub>3</sub>) ppm.

HRMS (ESI-TOF):  $m/z$   $[M-OH]^+$  Calcd for  $C_{19}H_{12}ClF_3NO^+$ : 362.0554; found: 362.0558;  $m/z$   $[M+H]^+$  Calcd for  $C_{19}H_{14}ClF_3NO_2^+$ : 380.066; found: 380.0661.

**(3*R*\*,4*aR*\*)-1-(4-Bromophenyl)-3-(trifluoromethyl)-3*H*,4*aH*-[1,3]oxazino[3,2-*a*]quinolin-3-ol (3*h*).**

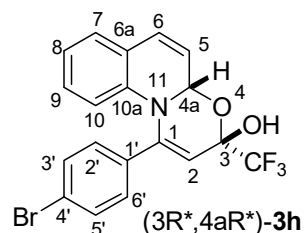

Obtained from quinoline **1a** (0.061 g, 0.475 mmol), acetylene **2h** (0.138 g, 0.5 mmol) and  $H_2O$  (0.009 g, 0.5 mmol) by procedure I keeping the reaction mixture for 6 h. Light-brown needles, m.p. 128-130 °C (MeCN),  $R_F(CH_2Cl_2-MeOH 100:1) = 0.73$ , yield 0.201 g (99%).  
 $^1H$  NMR (400.1 MHz,  $CD_3CN$ ):  $\delta$  7.55 (d,  $^3J = 8.7$  Hz, 2H, H-3',5'), 7.45 (d,  $^3J = 8.7$  Hz, 2H, H-2',6'), 7.24 (dd,  $^3J = 7.5$  Hz,  $^4J = 1.7$  Hz, 1H, H-7), 7.00 (d,  $^3J_{5,6} = 9.8$  Hz, 1H, H-6), 6.91 (td,  $^3J = 7.7$  Hz,  $^4J = 1.6$  Hz, 1H, H-9), 6.86 (td,  $^3J = 7.7$  Hz,  $^4J = 1.1$  Hz, 1H, H-8), 6.29 (d,  $^3J = 8.1$  Hz, 1H, H-10), 6.10 (dd,  $^3J_{5,6} = 9.7$  Hz,  $^3J_{4a,5} = 4.8$  Hz, 1H, H-5), 6.06 (s, 1H, H-2), 5.63 (d,  $^3J_{4a,5} = 4.7$  Hz, 1H, H-4a), 5.56 (s, 1H, OH) ppm.

$^{13}C$  NMR (100.6 MHz,  $CD_3CN$ ):  $\delta$  147.5(C-1), 138.0, 134.8, 133.1, 130.5, 129.6, 129.2, 128.9, 124.5, 123.5 (q,  $^1J_{CF} = 288.0$  Hz,  $CF_3$ ), 122.6, 121.7, 119.3, 118.0, 113.3 (C-2), 93.0 (q,  $^2J_{CF} = 33.3$  Hz, C-3), 78.4 (C-4a) ppm.  $^{19}F$  NMR (376.3 MHz,  $CD_3CN$ ):  $\delta$  -81.9 ( $CF_3$ ) ppm.

HRMS (ESI-TOF):  $m/z$   $[M-OH]^+$  Calcd for  $C_{19}H_{12}BrF_3NO^+$ : 406.0049; found: 406.0055;  $m/z$   $[M+H]^+$  Calcd for  $C_{19}H_{14}BrF_3NO_2^+$ : 424.0155; found: 424.0153.

**(3*R*\*,4*aR*\*)-1-(4-Methoxynaphthalen-1-yl)-3-(trifluoromethyl)-3*H*,4*aH*-[1,3]oxazino[3,2-*a*]quinolin-3-ol (3*i*).**

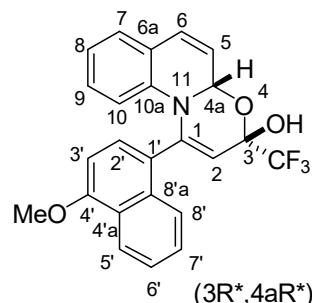

Obtained from quinoline **1a** (0.061 g, 0.475 mmol), acetylene **2i** (0.139 g, 0.5 mmol) and  $H_2O$  (0.009 g, 0.5 mmol) by procedure I keeping the reaction mixture for 184 h. Light-brown needles, m.p. 120-122 °C (MeCN),  $R_F(CH_2Cl_2-MeOH 100:1) = 0.50$ , yield 0.168 g (83%).

$^1H$  NMR (400.1 MHz,  $CD_3CN$ ):  $\delta$  8.31-8.28 (m, 2H, H-5', H-8'), 7.49-7.60 (m, 3H, H-2', H-6' and H-7'), 7.18 (dd,  $^3J = 7.3$  Hz,  $^4J = 1.6$  Hz, 1H, H-7), 6.99 (d,  $^3J_{5,6} = 9.8$  Hz, 1H, H-6), 6.89 (d,  $^3J_{2',3'} = 8.1$  Hz, 1H, H-2'), 6.73 (td,  $^3J = 7.3$  Hz,  $^4J = 1.2$  Hz, 1H, H-9), 6.68 (td,  $^3J = 7.8$  Hz,  $^4J = 1.6$  Hz, 1H, H-8), 6.42 (d,  $^3J = 8.1$  Hz, 1H, H-10), 6.15 (dd,  $^3J_{5,6} = 9.8$  Hz,  $^3J_{4a,5} = 4.7$  Hz, 1H, H-5), 5.90 (d,  $^3J_{4a,5} = 4.5$  Hz, 1H, H-4a), 5.86 (s, 1H, H-2), 5.63 (s, 1H, OH), 3.98 (s, 3H, MeO) ppm.

$^{13}C$  NMR (100.6 MHz,  $CD_3CN$ ):  $\delta$  157.5, 147.1 (C-1), 137.8, 132.4, 130.2, 129.6, 128.9, 128.5, 126.7, 125.6, 124.6, 123.8 (q,  $^1J_{CF} = 285.3$  Hz,  $CF_3$ ), 123.3, 122.0, 121.4, 119.2, 116.4, 114.5 (C-2), 104.8, 93.1 (q,  $^2J_{CF} = 32.8$  Hz, C-3), 78.7 (C-4a), 56.4 (OMe) ppm.

$^{19}F$  NMR (376.3 MHz,  $CD_3CN$ ):  $\delta$  -81.7 ( $CF_3$ ) ppm.

HRMS (ESI-TOF):  $m/z$   $[M-OH]^+$  Calcd for  $C_{24}H_{17}F_3NO_2^+$ : 408.1206; found: 408.1209;  $m/z$   $[M+H]^+$  Calcd for  $C_{24}H_{19}F_3NO_3^+$ : 426.1312; found: 426.1312.

$C_{24}H_{18}F_3NO_3$  (425.40): calcd C, 67.76; H, 4.26; N, 3.29; F, 13.40. Found C, 67.77; H, 4.51; N, 3.68; F, 13.23.

**(3R\*,4aR\*)-6,9-Dichloro-1-phenyl-3-(trifluoromethyl)-3H,4aH-[1,3]oxazino[3,2-a]quinolin-3-ol**

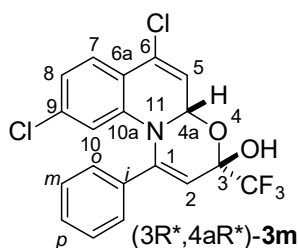

**(3m).** Obtained from quinoline **1e** (0.094 g, 0.475 mmol), acetylene **2a** (0.099 g, 0.5 mmol) and  $H_2O$  (0.009 g, 0.5 mmol) by procedure I keeping the reaction mixture for 80 h. Yellow crystals, m.p. 135-137 °C (MeCN),  $R_F(CH_2Cl_2-MeOH$  100:1) = 0.63, yield 0.095 g (48%).

$^1H$  NMR (400.1 MHz,  $CD_3CN$ ):  $\delta$  7.64 (d,  $^3J = 8.4$  Hz, 1H, H-7), 7.56-7.59 (m, 2H,  $H_o$  from Ph), 7.42-7.48 (m, 3H,  $H_{m,p}$  from Ph), 6.96 (dd,  $^3J = 8.5$  Hz,  $^4J = 2.0$  Hz, 1H, H-8), 6.37 (d,  $^3J_{4a,5} = 5.4$  Hz, 1H, H-5), 6.32 (d,  $^4J = 2.0$  Hz, 1H, H-10), 6.10 (s, 1H, H-2), 5.70 (d,  $^3J_{4a,5} = 5.4$  Hz, 1H, H-4a), 5.92 (br. s., 1H, OH) ppm.

$^{13}C$  NMR (100.6 MHz,  $CD_3CN$ ):  $\delta$  147.6 (C-1), 139.9, 135.9, 134.6, 133.6, 131.3, 130.2, 127.7, 127.3, 123.3 (q,  $^1J_{CF} = 285.3$  Hz,  $CF_3$ ), 121.6, 117.9, 117.8, 114.1 (C-2), 93.1 (q,  $^2J_{CF} = 33.2$  Hz, C-3), 78.8 (C-4a) ppm.

$^{19}F$  NMR (376.3 MHz,  $CD_3CN$ ):  $\delta$  -81.9 ( $CF_3$ ) ppm.

HRMS (ESI-TOF):  $m/z$   $[M-OH]^+$  Calcd for  $C_{19}H_{11}Cl_2F_3NO^+$ : 396.0164; found: 396.0161;  $m/z$   $[M+H]^+$  Calcd for  $C_{19}H_{13}Cl_2F_3NO_2^+$ : 414.027; found: 414.025.

**(3R\*,4aR\*)-6-Bromo-1-phenyl-3-(trifluoromethyl)-3H,4aH-[1,3]oxazino[3,2-a]quinolin-3-ol (3n).**

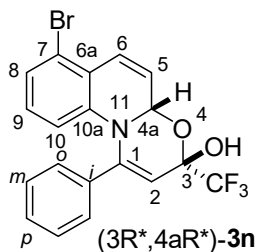

Obtained from quinoline **1f** (0.099 g, 0.475 mmol), acetylene **2a** (0.099 g, 0.5 mmol) and  $H_2O$  (0.009 g, 0.5 mmol) by procedure I keeping the reaction mixture for 40 h. Light-brown needles, m.p. 109-111 °C (MeCN),  $R_F(CH_2Cl_2-MeOH$  100:1) = 0.71, yield 0.175 g (87%).

$^1H$  NMR (400.1 MHz,  $CD_3CN$ ):  $\delta$  7.52-7.57 (m, 2H,  $H_o$  from Ph), 7.34-7.48 (m, 4H, H-6,  $H_{m,p}$  from Ph), 7.11 (dd,  $^3J = 8.0$  Hz,  $^4J = 0.7$  Hz, 1H, H-8), 6.78 (t,  $^3J = 8.1$  Hz, 1H, H-9), 6.33 (d,  $^3J = 8.4$  Hz, 1H, H-10), 6.24 (dd,  $^3J_{5,6} = 10.1$  Hz,  $^3J_{4a,5} = 4.9$  Hz, 1H, H-5), 6.07 (s, 1H, H-2), 5.64 (d,  $^3J = 4.9$  Hz, 1H, H-4a), 5.47 (br., s, OH) ppm.

$^{13}C$  NMR (100.6 MHz,  $CD_3CN$ ):  $\delta$  148.2 (C-1), 139.8, 135.2, 131.0, 130.3, 130.1, 128.7, 127.2, 125.5, 123.5 (q,  $^1J_{CF} = 284.9$  Hz,  $CF_3$ ), 123.0, 121.4, 117.9, 113.7 (C-2), 93.1 (q,  $^2J_{CF} = 32.8$  Hz, C-3), 78.0 (C-4a) ppm.

$^{19}F$  NMR (376.3 MHz,  $CD_3CN$ ):  $\delta$  -82.0 ( $CF_3$ ) ppm.

HRMS (ESI-TOF):  $m/z$   $[M-OH]^+$  Calcd for  $C_{19}H_{12}BrF_3NO^+$ : 406.0049; found: 406.0057;  $m/z$   $[M+H]^+$  Calcd for  $C_{19}H_{14}BrF_3NO_2^+$ : 424.0155; found: 424.0155.



**(3R\*,4aR\*)-3-Hydroxy-1-phenyl-3-(trifluoromethyl)-3H,4aH-[1,3]oxazino[3,2-a]quinoline-6-**

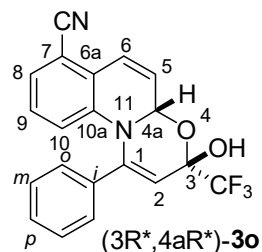

**carbonitrile (3o).** Obtained from quinoline **1g** (0.073 g, 0.475 mmol), acetylene **2a** (0.099 g, 0.5 mmol) and H<sub>2</sub>O (0.009 g, 0.5 mmol) by procedure I keeping the reaction mixture for 45 h. Light-brown needles, m.p. 108-110 °C (MeCN), R<sub>F</sub>(CH<sub>2</sub>Cl<sub>2</sub>-MeOH 100:1) = 0.30, yield 0.149 g (85%).

<sup>1</sup>H NMR (400.1 MHz, CD<sub>3</sub>CN): δ 7.51-7.56 (m, 2H, H<sub>o</sub> from Ph), 7.38-7.47 (m, 3H, H<sub>m,p</sub> from Ph), 7.31 (d, <sup>3</sup>J<sub>5,6</sub> = 9.9 Hz, 1H, H-6), 7.21 (dd, <sup>3</sup>J = 7.7 Hz, <sup>4</sup>J = 1.0 Hz, 1H, H-8), 6.99 (t, <sup>3</sup>J = 8.0 Hz, 1H, H-9), 6.59 (d, <sup>3</sup>J = 8.5 Hz, 1H, H-10), 6.37 (dd, <sup>3</sup>J<sub>5,6</sub> = 9.9 Hz, <sup>3</sup>J<sub>4a,5</sub> = 4.8 Hz, 1H, H-5), 6.11 (s, 1H, H-2), 5.64 (d, <sup>3</sup>J<sub>4a,5</sub> = 4.9 Hz, 1H, H-4a), 4.19 (br., s, OH) ppm.

<sup>13</sup>C NMR (100.6 MHz, CD<sub>3</sub>CN): δ 147.8 (C-1), 138.6, 134.8, 131.1, 130.2, 129.7, 127.2, 126.4, 125.6, 124.1, 123.4 (q, <sup>1</sup>J<sub>CF</sub> = 285.3 Hz, CF<sub>3</sub>), 123.2, 122.3, 117.8, 113.8 (C-2), 110.8 (CN), 93.1 (q, <sup>2</sup>J<sub>CF</sub> = 33.2 Hz, C-3), 77.8 (C-4a) ppm.

<sup>19</sup>F NMR (376.3 MHz, CD<sub>3</sub>CN): δ -82.0 (CF<sub>3</sub>) ppm.

HRMS (ESI-TOF): m/z [M-OH]<sup>+</sup> Calcd for C<sub>20</sub>H<sub>12</sub>F<sub>3</sub>N<sub>2</sub>O<sup>+</sup>: 353.0896; found: 353.0899; m/z [M+H]<sup>+</sup> Calcd for C<sub>20</sub>H<sub>14</sub>F<sub>3</sub>N<sub>2</sub>O<sub>2</sub><sup>+</sup>: 371.1002; found: 371.1004.

**(3R\*,4aR\*)-1-Phenyl-3-(trifluoromethyl)-3H,4aH-[1,3]oxazino[3,2-a]-quinolin-3-ol-d<sub>2</sub> (3a')**

Obtained from quinoline **1a** (0.061 g, 0.475 mmol) and acetylene **2a** (0.099 g, 0.5 mmol) by modified procedure I: D<sub>2</sub>O (0.010 g, 0.5 mmol, 1 equiv.) was used instead of H<sub>2</sub>O. Reaction mixture was kept for 24 h. Crude product was obtained by evaporation of MeCN in vacuo to give 0.170 g (~100%) of **3a'** as light-brown needles.

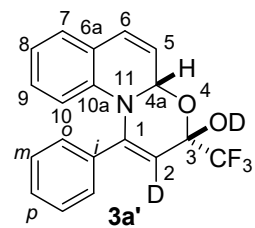

<sup>1</sup>H NMR (400.1 MHz, CD<sub>3</sub>CN): δ 7.55-7.63 (m, 2H, Ph), 7.38-7.47 (m, 3H, Ph), 7.23-7.30 (m, 1H), 6.82-7.07 (m, 3H), 6.28-6.39 (m, 1H), 6.07-6.19 (m, 1H), 5.61-5.73 (m, 1H) ppm. <sup>1</sup>H NMR (400.1 MHz, CDCl<sub>3</sub>): δ 7.48-7.56 (m, 2H, H<sub>o</sub> from Ph), 7.35-7.43 (m, 3H, H<sub>m,p</sub> from Ph), 7.18 (d, <sup>3</sup>J = 7.0 Hz, 1H, H-7), 6.96 (d, <sup>3</sup>J<sub>5,6</sub> = 9.5 Hz, 1H, H-6), 6.91 (t, <sup>3</sup>J = 7.9 Hz, 1H, H-9), 6.85 (t, <sup>3</sup>J = 7.2 Hz, 1H, H-8), 6.35 (d, <sup>3</sup>J = 7.7 Hz, 1H, H-10), 6.06 (m, 1H, H-5), 5.70 (m, 1H, H-4a) ppm.

<sup>13</sup>C NMR (100.6 MHz, CDCl<sub>3</sub>): δ 148.1, 137.1, 134.5, 130.4, 130.0, 129.1, 128.9, 127.9, 126.4, 122.3 (q, <sup>1</sup>J<sub>CF</sub> = 286.0 Hz, CF<sub>3</sub>), 120.7, 117.5, 110.52-110.56 (m, C-D), 92.1 (q, <sup>2</sup>J<sub>CF</sub> = 32.8 Hz), 78.2 ppm. <sup>13</sup>C NMR (100.6 MHz, CD<sub>3</sub>CN): δ 148.4 (C-1), 138.3, 135.6, 130.9, 130.4, 130.0, 129.6, 128.9, 127.5, 125.0, 123.6 (q, <sup>1</sup>J<sub>CF</sub> = 285.3 Hz, CF<sub>3</sub>), 119.4, 118.1, 112.69-112.90 (m, <sup>1</sup>J<sub>CD</sub>, C-2), 92.9 (q, <sup>2</sup>J<sub>CF</sub> = 32.4 Hz, C-3), 78.4 (C-4a) ppm.

<sup>19</sup>F NMR (376.3 MHz, CDCl<sub>3</sub>): δ -83.6 (CF<sub>3</sub>) ppm; <sup>19</sup>F NMR (376.3 MHz, CD<sub>3</sub>CN): δ -81.9 (CF<sub>3</sub>) ppm.

HRMS (ESI-TOF):  $m/z$   $[M-OD]^+$  Calcd for  $C_{19}H_{12}DF_3NO^+$ : 329.1007; found: 329.1003;  $m/z$   $[M-D+H]^+$  Calcd for  $C_{19}H_{14}DF_3NO_2^+$ : 347.1112; found: 347.1107. Exchange of D on H in hydroxyl has takes place during the experiment.

**1-Phenyl-3-(trifluoromethyl)-3*H*,4*aH*-[1,3]oxazino[3,2-*a*]quinolin-3-ol (3*a*), mixture of (3*R*\*,4*aR*\*)-**

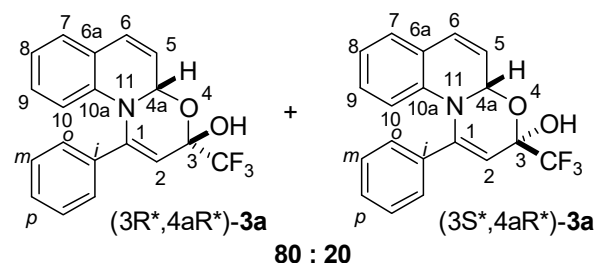

**and (3*S*\*,4*aR*\*)-diastereomers.**

Obtained from quinoline **1a** (0.065 g, 0.5 mmol), acetylene **2a** (0.099 g, 0.5 mmol) and  $H_2O$  (0.009 g, 0.5 mmol) by procedure II keeping the reaction mixture for 20 h.

White needles, m.p. 119-121 °C (hexane), yield 0.118 g (68%). Initial quinoline **1a** was recovered (0.010 g,

conversion was 85%). IR (microlayer): 3401 (OH), 1649, 1635, 1602 (C=C), 1188, 1181, 1088 (C-F)  $cm^{-1}$ . (3*R*\*,4*aR*\*):(3*S*\*,4*aR*\*)-isomers ratio is 80:20 ( $^1H$  NMR).

(3*R*\*,4*aR*\*)-**3a**:  $^1H$  NMR (400.1 MHz,  $CDCl_3$ ):  $\delta$  7.51 (m, 2H,  $H_o$  from Ph), 7.37 (m, 2H,  $H_m$  from Ph), 7.36 (m, 1H,  $H_p$  from Ph), 7.15 (d,  $^3J_{7,8} = 7.1$  Hz, 1H, H-7), 6.92 (d,  $^3J_{5,6} = 9.7$  Hz, 1H, H-6), 6.88 (m, 1H, H-9), 6.83 (m, 1H, H-8), 6.31 (d,  $^3J_{9,10} = 8.2$  Hz, 1H, H-10), 6.02 (dd,  $^3J_{4a,5} = 4.4$  Hz,  $^3J_{5,6} = 9.7$  Hz, 1H, H-5), 5.95 (s, 1H, H-2), 5.76 (d,  $^3J_{4a,5} = 4.4$  Hz, 1H, H-4a), 3.14 (s, 1H, OH) ppm.

$^{13}C$  NMR (100.6 MHz,  $CDCl_3$ ):  $\delta$  148.4 (C-1), 137.1 (C-10a), 134.6 ( $C_i$  from Ph), 130.5 (C-6), 130.1 ( $C_p$  from Ph), 129.2 ( $C_m$  from Ph), 129.0 (C-9), 128.0 (C-7), 126.6 ( $C_o$  from Ph), 122.4 (q,  $^1J_{CF} = 286.1$  Hz,  $CF_3$ ), 121.4 (C-6a), 120.8 (C-8), 117.6 (C-10), 117.5 (C-5), 110.4 (C-2), 92.3 (q,  $^2J_{CF} = 33.0$  Hz, C-3), 78.3 (C-4a) ppm.

$^{15}N$  NMR (40.5 MHz,  $CDCl_3$ ):  $\delta$  -283.7 (N-11) ppm.

$^{19}F$  NMR (376.5 MHz,  $CDCl_3$ ):  $\delta$  -82.8 ( $CF_3$ ) ppm.

(3*S*\*,4*aR*\*)-**3a** as a minor isomer in a mixture with the (3*R*\*,4*aR*\*)-**3a** isomer (ratio is 50:50):  $^1H$  NMR (400.1 MHz,  $CDCl_3$ ):  $\delta$  7.51 (m, 2H,  $H_o$  from Ph), 7.37 (m, 2H,  $H_m$  from Ph), 7.36 (m, 1H,  $H_p$  from Ph), 7.15 (d,  $^3J_{7,8} = 7.1$  Hz, 1H, H-7), 6.92 (d,  $^3J_{5,6} = 9.7$  Hz, 1H, H-6), 6.88 (m, 1H, H-9), 6.83 (m, 1H, H-8), 6.31 (d,  $^3J_{9,10} = 8.2$  Hz, 1H, H-10), 6.07 (dd,  $^3J_{4a,5} = 4.7$  Hz,  $^3J_{5,6} = 9.7$  Hz, 1H, H-5), 5.98 (s, 1H, H-2), 5.61 (d,  $^3J_{5a,6} = 4.7$  Hz, 1H, H-4a), 3.14 (s, 1H, OH) ppm.

$^{19}F$  NMR (376.5 MHz,  $CDCl_3$ ):  $\delta$  -79.6 ( $CF_3$ ) ppm. The signals in  $^{13}C$  NMR spectrum are not detected due to overlap with signals of other isomer.

$C_{19}H_{14}F_3NO_2$  (345.32): calcd C, 66.09; H, 4.09; N, 4.06; F, 16.51. Found C, 66.43; H, 4.06; N, 3.99; F, 16.76.

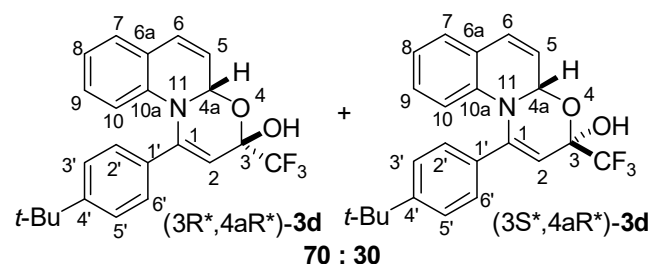

**1-(4-(*tert*-Butyl)phenyl)-3-(trifluoromethyl)-3*H*,4*aH*-[1,3]oxazino[3,2-*a*]quinolin-3-ol (3*d*), mixture of (3*R*\*,4*aR*\*)- and (3*S*\*,4*aR*\*)-**

**diastereomers.** Obtained from quinoline **1a** (0.039 g, 0.3 mmol), acetylene **2d** (0.076 g, 0.3 mmol) and H<sub>2</sub>O (0.005 g, 0.3 mmol) in 2 mL MeCN by procedure II keeping the reaction mixture for 24 h. Light-brown needles, m.p. 74-77 °C, yield 0.109 g (91%). IR (microlayer): 3399 (OH), 1649, 1633, 1602 (C=C), 1259, 1180, 1153, 1099 (C-F) cm<sup>-1</sup>. (3*R*\*,4*aR*\*):(3*S*\*,4*aR*\*)-isomers ratio is 70:30 (<sup>1</sup>H NMR).

(3*R*\*,4*aR*\*)-**3d**: <sup>1</sup>H NMR (400.1 MHz, CDCl<sub>3</sub>): δ 7.41 (m, 2H, H-2',6'), 7.33 (m, 2H, H-3',5'), 7.12 (d, <sup>3</sup>J<sub>7,8</sub> = 7.2 Hz, 1H, H-7), 6.88 (d, <sup>3</sup>J<sub>5,6</sub> = 9.6 Hz, 1H, H-6), 6.86 (m, 1H, H-9), 6.79 (m, 1H, H-8), 6.35 (d, <sup>3</sup>J<sub>9,10</sub> = 8.0 Hz, 1H, H-10), 5.98 (dd, <sup>3</sup>J<sub>4a,5</sub> = 4.6 Hz, <sup>3</sup>J<sub>5,6</sub> = 9.6 Hz, 1H, H-5), 5.92 (s, 1H, H-2), 5.62 (d, <sup>3</sup>J<sub>4a,5</sub> = 4.6 Hz, 1H, H-4a), 3.44 (br. s, 1H, OH), 1.28 (s, 9H, 3Me from *t*-Bu) ppm.

<sup>13</sup>C NMR (100.6 MHz, CDCl<sub>3</sub>): δ 153.5 (C-4'), 148.3 (C-1), 137.4 (C-10a), 131.8 (C-1'), 130.5 (C-6), 129.0 (C-9), 128.0 (C-7), 126.3 (C-2',6'), 126.1 (C-3',5'), 122.6 (q, <sup>1</sup>J<sub>CF</sub> = 284.3 Hz, CF<sub>3</sub>), 121.5 (C-6a), 120.7 (C-8), 117.7 (C-10, C-5), 110.0 (C-2), 92.4 (q, <sup>2</sup>J<sub>CF</sub> = 33.4 Hz, C-3), 78.4 (C-4a), 34.9 (C from *t*-Bu), 31.3 (3Me from *t*-Bu) ppm.

<sup>19</sup>F NMR (376.5 MHz, CDCl<sub>3</sub>): δ -82.7 (CF<sub>3</sub>) ppm.

(3*S*\*,4*aR*\*)-**3d**: <sup>1</sup>H NMR (400.1 MHz, CDCl<sub>3</sub>): δ 7.41 (m, 2H, H-2',6'), 7.33 (m, 2H, H-3',5'), 7.12 (d, <sup>3</sup>J<sub>7,8</sub> = 7.2 Hz, 1H, H-7), 6.89 (d, <sup>3</sup>J<sub>5,6</sub> = 9.7 Hz, 1H, H-6), 6.86 (m, 1H, H-9), 6.79 (m, 1H, H-8), 6.35 (d, <sup>3</sup>J<sub>9,10</sub> = 8.0 Hz, 1H, H-10), 6.05 (dd, <sup>3</sup>J<sub>4a,5</sub> = 4.6 Hz, <sup>3</sup>J<sub>5,6</sub> = 9.7 Hz, 1H, H-5), 5.90 (s, 1H, H-2), 5.58 (d, <sup>3</sup>J<sub>4a,5</sub> = 4.6 Hz, 1H, H-4a), 3.44 (br. s, 1H, OH), 1.28 (s, 9H, 3Me from *t*-Bu) ppm.

<sup>13</sup>C NMR (100.6 MHz, CDCl<sub>3</sub>): δ 153.4 (C-4'), 148.8 (C-1), 137.4 (C-10), 131.7 (C-1'), 130.3 (C-6), 129.0 (C-9), 128.0 (C-7), 126.2 (C-2',6'), 126.1 (C-3',5'), 122.3 (q, <sup>1</sup>J<sub>CF</sub> = 285.9 Hz, CF<sub>3</sub>), 121.3 (C-6a), 120.5 (C-8), 117.6 (C-5), 117.5 (C-10), 111.5 (C-4), 94.8 (q, <sup>2</sup>J<sub>CF</sub> = 31.8 Hz, C-3), 79.3 (C-4a), 34.9 (C from *t*-Bu), 31.3 (3Me from *t*-Bu) ppm.

<sup>19</sup>F NMR (376.5 MHz, CDCl<sub>3</sub>): δ -79.8 (CF<sub>3</sub>) ppm.

C<sub>23</sub>H<sub>22</sub>F<sub>3</sub>NO<sub>2</sub> (401.43): calcd C, 68.82; H, 5.52; N, 3.49; F, 14.20. Found: C, 68.47; H, 5.53; N, 3.15; F, 13.99.

**1-(4-Methoxyphenyl)-3-(trifluoromethyl)-3*H*,4*aH*-[1,3]-oxazino[3,2-*a*]quinolin-3-ol (**3e**), mixture of (3*R*\*,4*aR*\*)- and (3*S*\*,4*aR*\*)-diastereomers.**

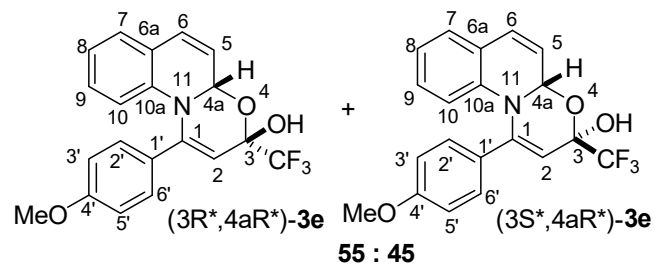

Obtained from quinoline **1a** (0.065 g, 0.5 mmol), acetylene **2e** (0.114 g, 0.5 mmol) and H<sub>2</sub>O (0.009 g, 0.5 mmol) by procedure II keeping the reaction mixture for 48 h. Light-yellow gum, yield 0.160 g (85%). Initial quinoline **1a** was recovered (0.009 g, conversion was 86%). IR (microlayer): br. 3393 (OH), 1633, 1605 (C=C), 1256, 1176, 1091 (C-F) cm<sup>-1</sup>.

(3*R*\*,4*aR*\*):(3*S*\*,4*aR*\*)-isomers ratio is 55:45 (<sup>1</sup>H NMR).

(3*R*\*,4*aR*\*)-3e: <sup>1</sup>H NMR (400.1 MHz, CDCl<sub>3</sub>): δ 7.42 (m, 2H, H-3',5'), 7.13 (d, <sup>3</sup>J<sub>7,8</sub> = 6.8 Hz, 1H, H-7), 6.86 (m, 1H, H-9), 6.82 (m, 2H, H-2',6'), 6.89 (d, <sup>3</sup>J<sub>5,6</sub> = 9.7 Hz, 1H, H-6), 6.79 (m, 1H, H-8), 6.35 (d, <sup>3</sup>J<sub>9,10</sub> = 8.1 Hz, 1H, H-10), 5.98 (dd, <sup>3</sup>J<sub>4a,5</sub> = 4.7 Hz, <sup>3</sup>J<sub>5,6</sub> = 9.7 Hz, 1H, H-5), 5.84 (s, 1H, H-2), 5.63 (d, <sup>3</sup>J<sub>4a,5</sub> = 4.7 Hz, 1H, H-4a), 3.77 (s, 3H, OMe), 3.44 (br. s, 1H, OH) ppm.

<sup>13</sup>C NMR (100.6 MHz, CDCl<sub>3</sub>): δ 161.2 (C-4'), 148.1 (C-1), 137.4 (C-10a), 130.5 (C-6), 128.9 (C-9), 128.5 (C-7), 128.0 (C-2',6'), 127.1 (C-1'), 122.6 (q, <sup>1</sup>J<sub>CF</sub> = 284.3 Hz, CF<sub>3</sub>), 121.6 (C-6a), 120.7 (C-8), 117.7 (C-5, C-10), 114.6 (C-3',5'), 108.9 (C-2), 92.5 (q, <sup>2</sup>J<sub>CF</sub> = 33.4 Hz, C-3), 78.3 (C-4a), 55.4 (OMe) ppm.

<sup>19</sup>F NMR (376.5 MHz, CDCl<sub>3</sub>): δ -82.6 (CF<sub>3</sub>) ppm.

(3*S*\*,4*aR*\*)-3e: <sup>1</sup>H NMR (400.1 MHz, CDCl<sub>3</sub>): δ 7.42 (m, 2H, H-3',5'), 7.13 (d, <sup>3</sup>J<sub>7,8</sub> = 6.8 Hz, 1H, H-7), 6.88 (m, 1H, H-9), 6.82 (m, 2H, H-2',6'), 6.89 (d, <sup>3</sup>J<sub>5,6</sub> = 9.7 Hz, 1H, H-6), 6.78 (m, 1H, H-8), 6.35 (d, <sup>3</sup>J<sub>9,10</sub> = 8.1 Hz, 1H, H-10), 6.05 (dd, <sup>3</sup>J<sub>4a,5</sub> = 4.7 Hz, <sup>3</sup>J<sub>5,6</sub> = 9.7 Hz, 1H, H-5), 5.83 (s, 1H, H-2), 5.58 (d, <sup>3</sup>J<sub>4a,5</sub> = 4.7 Hz, 1H, H-4a), 3.77 (s, 3H, OMe), 3.44 (br. s, 1H, OH) ppm.

<sup>13</sup>C NMR (100.6 MHz, CDCl<sub>3</sub>): δ 161.1 (C-4'), 148.5 (C-1), 137.4 (C-10a), 130.3 (C-6), 128.9 (C-9), 128.5 (C-7), 128.0 (C-2',6'), 127.1 (C-1'), 122.3 (q, <sup>1</sup>J<sub>CF</sub> = 285.1 Hz, CF<sub>3</sub>), 121.4 (C-6a), 120.6 (C-8), 117.5 (C-5, C-10), 114.6 (C-3',5'), 110.3 (C-2), 94.8 (q, <sup>2</sup>J<sub>CF</sub> = 32.2 Hz, C-3), 79.2 (C-4a), 55.4 (OMe) ppm.

<sup>19</sup>F NMR (376.5 MHz, CDCl<sub>3</sub>): δ -79.8 (CF<sub>3</sub>) ppm.

C<sub>20</sub>H<sub>16</sub>F<sub>3</sub>NO<sub>3</sub> (375.34): calcd C, 64.00; H, 4.30; N, 3.73; F, 15.18. Found: C, 64.07; H, 4.39; N, 3.62; F, 14.78.

### 1-(4-Bromophenyl)-3-(trifluoromethyl)-3*H*,4*aH*-[1,3]oxazino[3,2-*a*]quinolin-3-ol (3h), mixture of

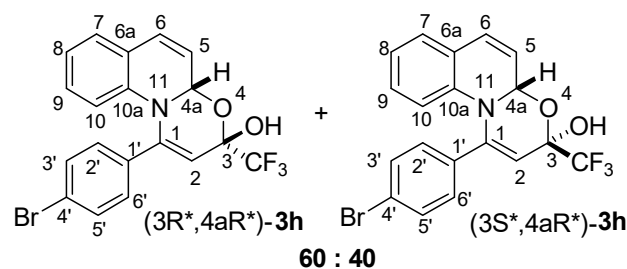

(3*R*\*,4*aR*\*)- and (3*S*\*,4*aR*\*)-diastereomers.

Obtained from quinoline **1a** (0.065 g, 0.5 mmol), acetylene **2h** (0.139 g, 0.5 mmol) and H<sub>2</sub>O (0.009 g, 0.5 mmol) by procedure II keeping the reaction mixture for 6 h. Light-yellow gum, yield 0.178 g (84%). Initial quinoline **1a** was recovered (0.009 g,

conversion was 86%). IR (microlayer): 3395 (OH), 1639, 1597 (C=C), 1260, 1184, 1092 (C-F) cm<sup>-1</sup>. (3*R*\*,4*aR*\*):(3*S*\*,4*aR*\*)-isomers ratio is 60:40 (<sup>1</sup>H NMR).

(3*R*\*,4*aR*\*)-3h: <sup>1</sup>H NMR (400.1 MHz, CDCl<sub>3</sub>): δ 7.48 (m, 2H, H-3',5'), 7.38 (m, 2H, H-2',6'), 7.16 (d, <sup>3</sup>J<sub>7,8</sub> = 7.4 Hz, 1H, H-7), 6.92 (d, <sup>3</sup>J<sub>5,6</sub> = 9.7 Hz, 1H, H-6), 6.91 (m, 1H, H-9), 6.85 (m, 1H, H-8), 6.27 (d, <sup>3</sup>J<sub>9,10</sub> = 7.8 Hz, 1H, H-10), 6.01 (dd, <sup>3</sup>J<sub>4a,5</sub> = 4.7 Hz, <sup>3</sup>J<sub>5,6</sub> = 9.7 Hz, 1H, H-5), 5.95 (s, 1H, H-2), 5.63 (d, <sup>3</sup>J<sub>4a,5</sub> = 4.7 Hz, 1H, H-4a), 3.33 (br. s, 1H, OH) ppm.

$^{13}\text{C}$  NMR (100.6 MHz,  $\text{CDCl}_3$ ):  $\delta$  147.6 (C-1), 137.0 (C-10a), 133.7 (C-1'), 132.5 (C-3',5'), 130.4 (C-6), 129.1 (C-9), 128.5 (C-7), 128.1 (C-2',6'), 124.4 (C-4'), 122.6 (q,  $^1J_{\text{CF}} = 284.3$  Hz,  $\text{CF}_3$ ), 121.6 (C-6a), 120.9 (C-8), 117.6 (C-5), 117.5 (C-10), 111.0 (C-2), 92.5 (q,  $^2J_{\text{CF}} = 33.4$  Hz, C-3), 78.3 (C-4a) ppm.

$^{19}\text{F}$  NMR (376.5 MHz,  $\text{CDCl}_3$ ):  $\delta$  -82.7 ( $\text{CF}_3$ ) ppm.

(3*S*\*,4*aR*\*)-**3h**:  $^1\text{H}$  NMR (400.13 MHz,  $\text{CDCl}_3$ ):  $\delta$  7.48 (m, 2H, H-3',5'), 7.38 (m, 2H, H-2',6'), 7.16 (d,  $^3J_{7,8} = 7.4$  Hz, 1H, H-7), 6.92 (d,  $^3J_{5,6} = 9.7$  Hz, 1H, H-6), 6.91 (m, 1H, H-9), 6.83 (m, 1H, H-8), 6.26 (d,  $^3J_{9,10} = 7.8$  Hz, 1H, H-10), 6.06 (dd,  $^3J_{4a,5} = 4.6$  Hz,  $^3J_{5,6} = 9.7$  Hz, 1H, H-5), 5.93 (s, 1H, H-2), 5.57 (d,  $^3J_{4a,5} = 4.6$  Hz, 1H, H-4a), 3.33 (br. s, 1H, OH) ppm.

$^{13}\text{C}$  NMR (100.6 MHz,  $\text{CDCl}_3$ ):  $\delta$  147.4 (C-1), 137.0 (C-10a), 133.7 (C-1'), 132.5 (C-3',5'), 130.6 (C-6), 129.1 (C-9), 128.5 (C-7), 128.1 (C-2',6'), 124.3 (C-4'), 122.3 (q,  $^1J_{\text{CF}} = 285.5$  Hz,  $\text{CF}_3$ ), 121.6 (C-8), 121.5 (C-6a), 117.5 (C-5), 117.4 (C-10), 112.8 (C-2), 94.8 (q,  $^2J_{\text{CF}} = 32.0$  Hz, C-3), 79.1 (C-4a) ppm.

$^{19}\text{F}$  NMR (376.5 MHz,  $\text{CDCl}_3$ ):  $\delta$  -79.3 ( $\text{CF}_3$ ) ppm.

$\text{C}_{19}\text{H}_{13}\text{BrF}_3\text{NO}_2$  (424.21): calcd C, 53.79; H, 3.09; Br, 18.84; N, 3.30; F, 13.44. Found C, 53.74; H, 3.25; Br, 19.22; F, 13.18; N, 3.05.

**1-(4-Methoxynaphthalen-1-yl)-3-(trifluoromethyl)-3*H*,4*aH*-[1,3]oxazino[3,2-*a*]quinolin-3-ol, (3i)**

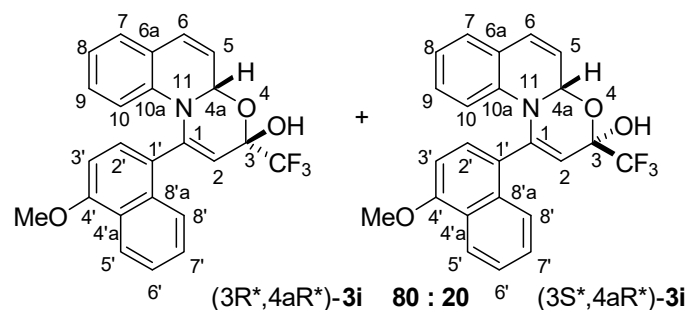

**mixture of (3*R*\*,4*aR*\*)- and (3*S*\*,4*aR*\*)- diastereomers.** Obtained from quinoline **1a** (0.065 g, 0.5 mmol), acetylene **2i** (0.139 g, 0.5 mmol) and  $\text{H}_2\text{O}$  (0.009 g, 0.5 mmol) by procedure II keeping the reaction mixture for 184 h. Light-beige needles, m.p. 114-117 °C (hexane), yield 0.163 g (77%). Initial quinoline

**1a** was recovered (0.013 g, conversion was 80%). IR (microlayer): 3398 (OH), 1643, 1630 (C=C), 1245, 1183, 1100 (C-F)  $\text{cm}^{-1}$ . (3*R*\*,4*aR*\*):(3*S*\*,4*aR*\*)-isomers ratio is 80:20 ( $^1\text{H}$  NMR).

(3*R*\*,4*aR*\*)-**3i**:  $^1\text{H}$  NMR (400.1 MHz,  $\text{CDCl}_3$ ):  $\delta$  8.32 (m, 2H, H-5', H-8'), 7.48 (m, 3H, H-2', H-6' and H-7'), 7.09 (m, 1H, H-7), 6.90 (d,  $^3J_{5,6} = 9.6$  Hz, 1H, H-6), 6.72 (m, 1H, H-3'), 6.71 (m, 2H, H-8, H-9), 6.43 (m, 1H, H-10), 6.03 (dd,  $^3J_{4a,5} = 4.7$  Hz,  $^3J_{5,6} = 9.6$  Hz, 1H, H-5), 5.87 (s, 1H, H-2), 5.87 (d,  $^3J_{4a,5} = 4.7$  Hz, 1H, H-4a), 4.74 (br. s, 1H, OH), 3.97 (s, 3H, OMe) ppm.

$^{13}\text{C}$  NMR (100.6 MHz,  $\text{CDCl}_3$ ):  $\delta$  156.8 (C-4'), 146.5 (C-1), 137.0 (C-10a), 131.9 (C-8'a), 130.4 (C-6), 129.2 (C-9), 128.1 (C-7), 127.8 (C-8'), 127.6 (C-1'), 126.3 (C-7'), 125.7 (C-6'), 124.8 (C-4'a), 124.1 (C-2'), 122.8 (q,  $^1J_{\text{CF}} = 284.3$  Hz,  $\text{CF}_3$ ; C-5'), 121.1 (C-6a), 120.6 (C-8), 117.6 (C-5), 116.3 (C-10), 113.1 (C-2), 103.6 (C-3'), 92.5 (q,  $^2J_{\text{CF}} = 33.0$  Hz, C-3), 78.6 (C-4a), 55.7 (OMe) ppm.

$^{19}\text{F}$  NMR (376.5 MHz,  $\text{CDCl}_3$ ):  $\delta$  -82.3 ( $\text{CF}_3$ ) ppm.

(3*S*\*,4*aR*\*)-**3i** as a minor isomer in a mixture with the (3*R*\*,4*aR*\*)-**3i** isomer and quinoline **1a** (ratio is 15:55:30): <sup>1</sup>H NMR (400.1 MHz, CDCl<sub>3</sub>): δ 8.32 (m, 2H, H-5', H-8'), 7.48 (m, 3H, H-2', H-6' and H-7'), 7.09 (m, 1H, H-7), 6.92 (d, <sup>3</sup>J<sub>5,6</sub> = 9.8 Hz, 1H, H-6), 6.72 (m, 1H, H<sub>3'</sub> from Napht), 6.71 (m, 2H, H-8, H-9), 6.43 (m, 1H, H-10), 6.11 (dd, <sup>3</sup>J<sub>5,6</sub> = 9.8 Hz, <sup>3</sup>J<sub>4a,5</sub> = 4.6 Hz, 1H, H-5), 5.81 (s, 1H, H-2), 5.80 (d, <sup>3</sup>J<sub>4a,5</sub> = 4.6 Hz, 1H, H-4a), 4.74 (br. s, 1H, OH), 3.97 (s, 3H, OMe) ppm.

<sup>13</sup>C NMR (100.6 MHz, CDCl<sub>3</sub>): δ 156.8 (C-4'), 145.0 (C-1), 137.0 (C-10a), 131.9 (C-8'a), 130.3 (C-6), 129.2 (C-9), 128.1 (C-7), 127.8 (C-8'), 127.6 (C-1'), 126.3 (C-7'), 125.7 (C-6'), 124.8 (C-4'a), 124.1 (C-2'), 122.8 (C-5'), 122.6 (q, <sup>1</sup>J<sub>CF</sub> = 284.9 Hz, CF<sub>3</sub>), 121.1 (C-6a), 120.5 (C-8), 117.3 (C-5), 116.2 (C-10), 114.2 (C-2), 103.6 (C-3'), 94.7 (q, <sup>2</sup>J<sub>CF</sub> = 32.4 Hz, C-3), 79.7 (C-4a), 55.7 (OMe) ppm.

<sup>19</sup>F NMR (376.5 MHz, CDCl<sub>3</sub>): δ -79.5 ppm.

C<sub>24</sub>H<sub>18</sub>F<sub>3</sub>NO<sub>3</sub> (425.40): calcd C, 67.76; H, 4.26; N, 3.29; F, 13.40. Found C, 67.77; H, 4.51; N, 3.68; F, 13.23.

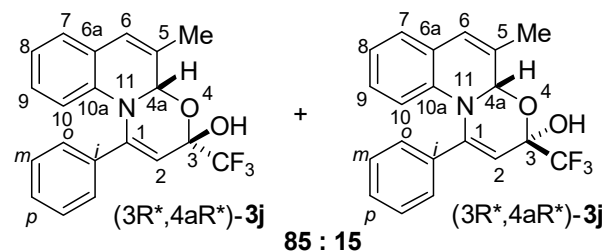

**5-Methyl-1-phenyl-3-(trifluoromethyl)-3*H*,4*aH*-[1,3]-oxazino[3,2-*a*]quinolin-3-ol (**3j**), mixture of (3*R*\*,4*aR*\*)- and (3*S*\*,4*aR*\*)-diastereomers.**

Obtained from quinoline **1b** (0.072 g, 0.5 mmol), acetylene **2a** (0.099 g, 0.5 mmol) and H<sub>2</sub>O (0.009 g, 0.5 mmol) by procedure II keeping the reaction mixture for 24 h. White needles, m.p. 104-106 °C (hexane), yield 0.134 g (75%). Initial quinoline **1b** was recovered (0.015 g, conversion was 79%). IR (microlayer): 3372 (OH), 1632, 1601 (C=C), 1258, 1178, 1084 (C-F) cm<sup>-1</sup>. (3*R*\*,4*aR*\*):(3*S*\*,4*aR*\*)-isomers ratio is 85:15 (<sup>1</sup>H NMR).

(3*R*\*,4*aR*\*)-**3j**: <sup>1</sup>H NMR (400.1 MHz, CDCl<sub>3</sub>): δ 7.50 (m, 2H, H<sub>o</sub> from Ph), 7.36 (m, 2H, H<sub>m</sub> from Ph), 7.36 (m, 1H, H<sub>p</sub> from Ph), 7.08 (d, <sup>3</sup>J<sub>7,8</sub> = 7.0 Hz, 1H, H-7), 6.80 (m, 2H, H-8, H-9), 6.64 (s, 1H, H-6), 6.27 (d, <sup>3</sup>J<sub>9,10</sub> = 8.0 Hz, 1H, H-10), 5.94 (s, 1H, H-2), 5.47 (s, 1H, H-4a), 3.19 (s, 1H, OH), 2.10 (s, 3H, Me) ppm.

<sup>13</sup>C NMR (100.6 MHz, CDCl<sub>3</sub>): δ 148.6 (C-1), 136.0 (C-10a), 134.9 (C<sub>i</sub> from Ph), 130.1 (C<sub>p</sub> from Ph), 129.2 (C<sub>m</sub> from Ph), 127.9 (C-9), 127.1 (C-7), 126.9 (C-5), 126.7 (C<sub>o</sub> from Ph), 126.1 (C-6), 122.6 (q, <sup>1</sup>J<sub>CF</sub> = 284.3 Hz, CF<sub>3</sub>), 122.2 (C-6a), 120.9 (C-8), 117.3 (C-10), 110.2 (C-2), 92.5 (q, <sup>2</sup>J<sub>CF</sub> = 33.4 Hz, C-3), 82.4 (C-4a), 19.7 (Me) ppm.

<sup>19</sup>F NMR (376.5 MHz, CDCl<sub>3</sub>): δ -82.7 (CF<sub>3</sub>) ppm.

(3*S*\*,4*aR*\*)-**3j**: <sup>1</sup>H NMR (400.1 MHz, CDCl<sub>3</sub>): δ 5.91 (s, 1H, H-2), 5.43 (s, 1H, H-4a), 2.14 (s, 3H, Me) ppm.

Other <sup>1</sup>H and <sup>13</sup>C signals were not detected due to low concentration of this isomer.

<sup>19</sup>F NMR (376.5 MHz, CDCl<sub>3</sub>): δ -79.0 (CF<sub>3</sub>) ppm.

C<sub>20</sub>H<sub>16</sub>F<sub>3</sub>NO<sub>2</sub> (359.34): calcd C, 66.85; H, 4.49; N, 3.90; F, 15.86. Found C, 66.72; H, 4.29; N, 4.02; F, 15.61.

**5-Bromo-1-phenyl-3-(trifluoromethyl)-3*H*,4*aH*-[1,3]-oxazino[3,2-*a*]quinolin-3-ol (3*k*), mixture of (3*R*\*,4*aR*\*)- and (3*S*\*,4*aR*\*)-diastereomers.**

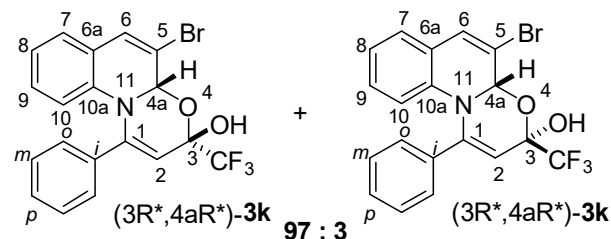

Obtained from quinoline **1c** (0.104 g, 0.5 mmol), acetylene **2a** (0.099 g, 0.5 mmol) and H<sub>2</sub>O (0.009 g, 0.5 mmol) by procedure II keeping the reaction mixture for 144 h. Light-yellow needles, m.p. 64-67

°C, yield 0.145 g (68%). Initial quinoline **1c** was recovered (0.007 g, conversion was 93%). IR (microlayer): 3366 (OH), 1636, 1602 (C=C), 1258, 1180, 1097 (C-F) cm<sup>-1</sup>. (3*R*\*,4*aR*\*):(3*S*\*,4*aR*\*)-isomers ratio is 97:3 (<sup>1</sup>H NMR).

(3*R*\*,4*aR*\*)-**3k**: <sup>1</sup>H NMR (400.1 MHz, CDCl<sub>3</sub>): δ 7.51 (m, 2H, H<sub>o</sub> from Ph), 7.37 (m, 2H, H<sub>m</sub> from Ph), 7.36 (m, 1H, H<sub>p</sub> from Ph), 7.22 (s, 1H, H-6), 7.10 (d, <sup>3</sup>J<sub>7,8</sub> = 7.4 Hz, 1H, H-7), 6.90 (m, 1H, H-9), 6.83 (m, 1H, H-8), 6.32 (d, <sup>3</sup>J<sub>9,10</sub> = 8.1 Hz, 1H, H-10), 6.00 (s, 1H, H-2), 5.72 (s, 1H, H-4a), 3.85 (br. s, 1H, OH) ppm.

<sup>13</sup>C NMR (100.6 MHz, CDCl<sub>3</sub>): δ 147.7 (C-2), 136.0 (C-11a), 134.3 (C<sub>i</sub> from Ph), 132.3 (C-6), 130.3 (C<sub>p</sub> from Ph), 129.3 (C<sub>m</sub> from Ph), 128.5 (C-9), 127.5 (C-7), 126.6 (C<sub>o</sub> from Ph), 122.4 (q, <sup>1</sup>J<sub>CF</sub> = 284.7 Hz, CF<sub>3</sub>), 121.4 (C-6a), 121.3 (C-8), 117.7 (C-10), 111.4 (C-5), 111.1 (C-2), 92.8 (q, <sup>2</sup>J<sub>CF</sub> = 33.3 Hz, C-3), 83.1 (C-4a) ppm.

<sup>19</sup>F NMR (376.5 MHz, CDCl<sub>3</sub>): δ -82.6 (CF<sub>3</sub>) ppm.

(3*S*\*,4*aR*\*)-**3k**: <sup>1</sup>H NMR (400.1 MHz, CDCl<sub>3</sub>): δ 5.95 (s, 1H, H-2), 5.68 (s, 1H, H-4a) ppm.

Other <sup>1</sup>H and <sup>13</sup>C signals were not detected due to low concentration of this isomer.

<sup>19</sup>F NMR (376.5 MHz, CDCl<sub>3</sub>): δ -78.7 (CF<sub>3</sub>) ppm.

C<sub>19</sub>H<sub>13</sub>BrF<sub>3</sub>NO<sub>2</sub> (424.21): calcd C, 53.79; H, 3.09; N, 3.30; Br, 18.84; F, 13.44. Found C, 53.98; H, 3.11; N, 3.68; Br, 18.90; F, 13.27.

**Associate of 5-bromo-1-phenyl-3-(trifluoromethyl)-3*H*,4*aH*-[1,3]oxazino[3,2-*a*]quinolin-3-ol and 3-bromoquinoline (3*k*') (composition 1:1).**

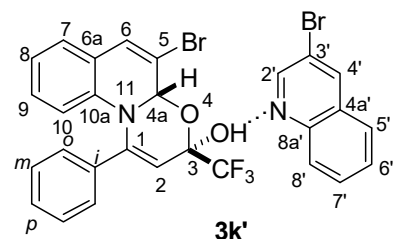

Isolated as an admixture in the synthesis of the mixture of (3*R*\*,4*aR*\*)-**3k** and (3*S*\*,4*aR*\*)-**3k**. Colorless needles, m.p. 146-148 °C (ethanol), yield 0.040 g (13%). IR (microlayer): 1637, 1601 (C=C), 1258, 1177, 1125 (C-F) cm<sup>-1</sup>; (diluted solution with CCl<sub>4</sub>, d = 1 cm): 3568 (OH) cm<sup>-1</sup>.

<sup>1</sup>H NMR (400.1 MHz, CDCl<sub>3</sub>): δ 8.91 (s, 1H, H-2'), 8.31 (s, 1H, H-4'), 8.10 (d, <sup>3</sup>J<sub>7,8</sub> = 8.6 Hz, 1H, H-8'), 7.70 (m, 2H, H-5', H-7'), 7.54 (m, 1H, H-6'), 7.51 (m, 2H, H<sub>o</sub> from

Ph), 7.37 (m, 2H,  $H_m$  from Ph), 7.36 (m, 1H,  $H_p$  from Ph), 7.22 (s, 1H, H-6), 7.10 (d,  $^3J_{7,8} = 7.4$  Hz, 1H, H-7), 6.90 (m, 1H, H-9), 6.83 (m, 1H, H-8), 6.32 (d,  $^3J_{9,10} = 8.1$  Hz, 1H, H-10), 6.00 (s, 1H, H-2), 5.72 (s, 1H, H-4a), 4.63 (br. s, 1H, OH) ppm.

$^{13}\text{C}$  NMR (100.6 MHz,  $\text{CDCl}_3$ ):  $\delta$  151.4 (C-2'), 147.7 (C-1), 146.2 (C-8a'), 137.7 (C-4'), 136.0 (C-10a), 134.3 ( $C_i$  from Ph), 132.3 (C-6), 130.3 ( $C_p$  from Ph), 130.0 (C-8'), 129.4 (C-7'), 129.3 ( $C_m$  from Ph; C-5'; C-4a'), 128.5 (C-9), 127.5 (C-7), 127.1 (C-6'), 126.6 ( $C_o$  from Ph), 122.4 (q,  $^1J_{\text{CF}} = 284.3$  Hz,  $\text{CF}_3$ ), 121.4 (C-6a), 121.3 (C-8), 117.7 (C-10), 117.3 (C-3'), 111.4 (C-5), 111.1 (C-2), 92.8 (q,  $^2J_{\text{CF}} = 33.3$  Hz, C-3), 83.1 (C-4a) ppm.

$^{19}\text{F}$  NMR (376.5 MHz,  $\text{CDCl}_3$ ):  $\delta$  -82.5 ( $\text{CF}_3$ ) ppm.

$\text{C}_{28}\text{H}_{19}\text{Br}_2\text{F}_3\text{N}_2\text{O}_2$  (633.27): calcd C, 53.19; H, 3.03; N, 4.43; F, 9.01; Br, 25.28. Found C, 53.53; H, 3.20; N, 4.49; F, 10.00; Br, 24.89.

### 8-Chloro-1-phenyl-3-(trifluoromethyl)-3*H*,4*aH*-[1,3]-oxazino[3,2-*a*]quinolin-3-ol (**3**), mixture of (**3*R*\*,4*aR*\***)- and (**3*S*\*,4*aR*\***)-diastereomers.

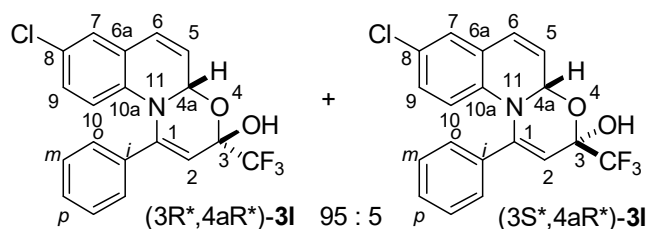

(**3*R*\*,4*aR*\***)- and (**3*S*\*,4*aR*\***)-diastereomers.

Obtained from quinoline **1d** (0.082 g, 0.5 mmol), acetylene **2a** (0.099 g, 0.5 mmol) and  $\text{H}_2\text{O}$  (0.009 g, 0.5 mmol) by procedure II keeping the reaction mixture for 24 h. White needles, m.p. 127-129 °C

(hexane), yield 0.130 g (68%). Initial quinoline **1d** was recovered (0.015 g, conversion was 82%). IR (microlayer): 3392 (OH), 1638 (C=C), 1259, 1185, 1090 (C-F)  $\text{cm}^{-1}$ . (**3*R*\*,4*aR*\***):(**3*S*\*,4*aR*\***)-isomers ratio is 95:5 ( $^1\text{H}$  NMR).

(**3*R*\*,4*aR*\***)-**3**:  $^1\text{H}$  NMR (400.1 MHz,  $\text{CDCl}_3$ ):  $\delta$  7.49 (m, 2H,  $H_o$  from Ph), 7.37 (m, 3H,  $H_{m,p}$  from Ph), 7.14 (d,  $^4J_{7,9} = 1.5$  Hz, 1H, H-7), 6.85 (d,  $^3J_{5,6} = 9.4$  Hz, 1H, H-6), 6.83 (dd,  $^3J_{9,10} = 8.8$  Hz, 1H, H-9), 6.24 (d,  $^3J_{9,10} = 8.8$  Hz, 1H, H-10), 6.07 (dd,  $^3J_{5,6} = 9.4$  Hz,  $^3J_{4a,5} = 3.8$  Hz, 1H, H-5), 5.96 (s, 1H, H-2), 5.64 (d,  $^3J_{4a,5} = 3.8$  Hz, 1H, H-4a), 3.22 (s, 1H, OH) ppm.

$^{13}\text{C}$  NMR (100.6 MHz,  $\text{CDCl}_3$ ):  $\delta$  148.2 (C-1), 135.7 (C-10a), 134.3 ( $C_i$  from Ph), 130.4 (C-6), 129.6 ( $C_p$  from Ph), 129.4 ( $C_m$  from Ph), 128.7 (C-9), 127.5 (C-7), 126.6 ( $C_o$  from Ph), 125.9 (C-8), 122.9 (C-6a), 122.4 (q,  $^1J_{\text{CF}} = 284.3$  Hz,  $\text{CF}_3$ ), 119.0 (C-5), 118.8 (C-10), 110.7 (C-2), 92.4 (q,  $^2J_{\text{CF}} = 34.1$  Hz, C-3), 78.1 (C-4a) ppm.

$^{19}\text{F}$  NMR (376.5 MHz,  $\text{CDCl}_3$ ):  $\delta$  -82.8 ( $\text{CF}_3$ ) ppm.

(**3*S*\*,4*aR*\***)-**3**:  $^1\text{H}$  NMR (400.1 MHz,  $\text{CDCl}_3$ ):  $\delta$  6.12 (dd,  $^3J_{4a,5} = 4.4$  Hz,  $^3J_{5,6} = 9.6$  Hz, 1H, H-5), 5.88 (s, 1H, H-2), 5.59 (d,  $^3J_{4a,5} = 4.4$  Hz, 1H, H-4a) ppm.

Other  $^1\text{H}$  and  $^{13}\text{C}$  signals were not detected due to low concentration of this isomer.

$^{19}\text{F}$  NMR (376.5 MHz,  $\text{CDCl}_3$ ):  $\delta$  -79.6 ( $\text{CF}_3$ ) ppm.



C<sub>19</sub>H<sub>13</sub>ClF<sub>3</sub>NO<sub>2</sub> (379.76): calcd C, 60.09; H, 3.45; N, 3.69; Cl, 9.34; F, 15.01. Found C, 59.91; H, 3.50; N, 3.30; Cl, 9.63; F, 15.13.

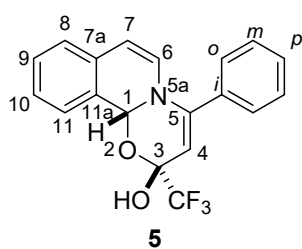

**(2R\*,11bR)-4-Phenyl-2-(trifluoromethyl)-2H,11bH-[1,3]oxazino-[2,3-**

**a]isoquinolin-2-ol (5).** Analogously procedure II, from isoquinoline (4) (0.039 g, 0.3 mmol), acetylene **2a** (0.059 g, 0.3 mmol), and H<sub>2</sub>O (0.005 g, 0.3 mmol) in 2 mL MeCN (-5~0 °C to 20-24 °C, 4 h) 1,3-oxazinoisoquinoline **5** (0.065 g, 63%) was obtained as a yellow oil. Initial isoquinoline **4** was recovered (0.010 g, conversion was 74%). IR (microlayer): br. 3344 (OH),

1634, 1603 (C=C), 1257, 1179, 1073 (C-F) cm<sup>-1</sup>.

<sup>1</sup>H NMR (400.1 MHz, CDCl<sub>3</sub>): δ 7.50-7.40 (m, 7H, H-9, H-11, H<sub>o,m,p</sub> from Ph), 7.27 (m, 1H, H-10), 7.15 (d, <sup>3</sup>J<sub>8,9</sub> = 7.2 Hz, 1H, H-8), 6.35 (d, <sup>3</sup>J<sub>6,7</sub> = 7.6 Hz, 1H, H-6), 5.71 (d, <sup>3</sup>J<sub>6,7</sub> = 7.6 Hz, 1H, H-7), 5.58 (s, 1H, H-11b), 3.58 (br. s, 1H, OH) ppm.

<sup>13</sup>C NMR (100.6 MHz, CDCl<sub>3</sub>): δ 147.6 (C-4), 133.6 (C<sub>i</sub> from Ph), 131.6 (C-7a), 130.3 (C<sub>p</sub> from Ph), 129.7 (C-6), 129.0 (C<sub>o</sub> from Ph), 128.9 (C-9), 128.7 (C<sub>m</sub> from Ph), 127.5 (C-11), 126.9 (C-10), 125.3 (C-11a), 124.9 (C-8), 122.6 (q, <sup>1</sup>J<sub>CF</sub> = 285.7 Hz, CF<sub>3</sub>), 103.8 (C-3), 101.8 (C-7), 92.6 (q, <sup>2</sup>J<sub>CF</sub> = 33.4 Hz, C-2), 79.4 (C-11b) ppm.

<sup>19</sup>F NMR (376.5 MHz, CDCl<sub>3</sub>): δ -82.0 (CF<sub>3</sub>) ppm.

C<sub>19</sub>H<sub>14</sub>F<sub>3</sub>NO<sub>2</sub> (345.32): calcd C, 66.09; H, 4.09; N, 4.06; F, 16.51. Found C, 65.97; H, 3.98; N, 3.68; F, 16.16.

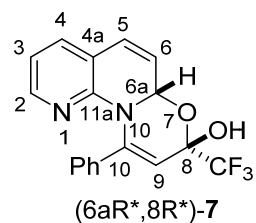

**(6aR\*,8R\*)-10-phenyl-8-(trifluoromethyl)-6aH,8H-[1,3]oxazino[3,2-**

**a][1,8]naphthyridin-8-ol (7)** obtained from 1,8-naphthyridine (6) (0.062 g, 0.475 mmol), acetylene **2a** (0.099 g, 0.5 mmol) and H<sub>2</sub>O (0.009 g, 0.5 mmol) by procedure I keeping the reaction mixture for 36 h. Pale brown crystals, m.p. 145-

147 °C (hexane), yield 0.149 g (91%). <sup>1</sup>H NMR (400.1 MHz, CD<sub>3</sub>CN): δ 7.73 (dd, <sup>3</sup>J = 5.0 Hz, <sup>4</sup>J = 1.8 Hz, 1H), 7.55 (dd, <sup>3</sup>J = 7.4 Hz, <sup>4</sup>J = 1.8 Hz, 1H), 7.49-7.45 (m, 2H, H<sub>o</sub> from Ph), 7.37-7.32 (m, 3H, H<sub>m,p</sub> from Ph), 7.00 (d, <sup>3</sup>J = 9.7 Hz, 1H), 6.82 (dd, <sup>3</sup>J = 7.4 Hz, <sup>3</sup>J = 4.9 Hz, 1H), 6.16 (dd, <sup>3</sup>J = 9.7 Hz, <sup>3</sup>J = 4.7 Hz, 1H), 5.96 (s, 1H), 5.81 (d, <sup>3</sup>J = 4.8 Hz, 1H), 5.48 (s, 1H, OH) ppm. <sup>19</sup>F NMR (376.50 Hz, CD<sub>3</sub>CN): δ -82.2 (CF<sub>3</sub>) ppm. <sup>13</sup>C NMR (100.6 Hz, CD<sub>3</sub>CN): δ 150.4, 148.6, 147.9, 137.2, 135.9, 129.8, 129.3, 126.7, 123.5 (q, <sup>1</sup>J<sub>CF</sub> = 285.3 Hz, CF<sub>3</sub>), 120.5, 117.8, 116.9, 111.9, 92.9 (q, <sup>2</sup>J<sub>CF</sub> = 33.2 Hz, C-CF<sub>3</sub>), 78.8 ppm.

HRMS (ESI-TOF): m/z [M-OH]<sup>+</sup> Calcd for C<sub>18</sub>H<sub>12</sub>F<sub>3</sub>N<sub>2</sub>O<sup>+</sup>: 329.0896; found: 329.0899; m/z [M+H]<sup>+</sup> Calcd for C<sub>18</sub>H<sub>14</sub>F<sub>3</sub>N<sub>2</sub>O<sub>2</sub><sup>+</sup>: 347.1002; found: 347.1002.

### Synthesis of 1,8-naphthyridine 6

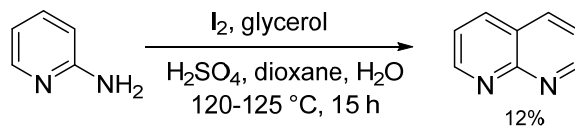

Round bottom 250 mL three-neck flask was charged with dioxane (30 mL), water (30 mL), 2-aminopyridine (5.00 g, 53 mmol) and glycerol (15.5 mL, 212 mmol) at stirring to give clear solution. After cooling on ice bath, conc. H<sub>2</sub>SO<sub>4</sub> (55 mL) were added dropwise at 0-5 °C (about 2.5-3 h). Then, iodine (4.04 g, 15.9 mmol) were added and the reaction mixture was heated at reflux for 15 h (internal temperature 120-125 °C). After cooling to room temperature, the reaction mixture was carefully basified by 50% aq. NaOH solution (200-250 mL). The obtained brown-black syrup-like solution was filtered through a celite pad and extracted with CH<sub>2</sub>Cl<sub>2</sub> (6 times by 70-80 mL until no spot of the product were observed on TLC run of new extracted portion). Light brown extract was dried over Na<sub>2</sub>SO<sub>4</sub> and evaporated in vacuo. The residue was purified by column chromatography on silica gel (CH<sub>2</sub>Cl<sub>2</sub>-MeOH 30:1 as an eluent) to give 0.820 g (12%) of 1,8-naphthyridine as a pale brown solid, m.p. 97-99 °C (lit. data: 97-98 °C, E. M. Hawes, D. G. Wibberley, *J. Chem. Soc. [Section] C: Organic*, **1967**, 1564-1568). <sup>1</sup>H NMR (400.1 MHz, CDCl<sub>3</sub>): δ 9.04–9.01 (m, 2H), 8.09 (dd, <sup>3</sup>J = 8.1 Hz, <sup>4</sup>J = 1.4 Hz, 2H), 7.38 (dd, <sup>3</sup>J = 8.1 Hz, <sup>4</sup>J = 4.2 Hz, 2H). <sup>13</sup>C NMR (100.6 Hz, CDCl<sub>3</sub>): δ 155.9, 153.4, 136.9, 122.6, 121.9 ppm. NMR data are in agreement with those in the literature (N. R. Rivera, Y. Hsiao, J. A. Cowen, C. McWilliams, J. Armstrong, N. Yasuda, D. L. Hughes, *Synth. Commun.*, **2001**, 31, 1573-1579).

FW 345.3152 Formula C<sub>19</sub>H<sub>14</sub>F<sub>3</sub>NO<sub>2</sub>

|                        |                                                       |                       |                      |                        |                      |
|------------------------|-------------------------------------------------------|-----------------------|----------------------|------------------------|----------------------|
| Acquisition Time (sec) | 2.9295                                                | Comment               | Imported from UXNMR. | Date                   | 24 Jun 2017 22:42:08 |
| File Name              | D:\BN\output\201706.epi\170624 (1)\BM-1114-K2_001001r | Frequency (MHz)       | 400.13               | Nucleus                | 1H                   |
| Number of Transients   | 16                                                    | Original Points Count | 16384                | Points Count           | 65536                |
| Solvent                | ACETONITRILE-D3                                       | Sweep Width (Hz)      | 5592.84              | Pulse Sequence         | zg30                 |
|                        |                                                       |                       |                      | Temperature (degree C) | 27.000               |

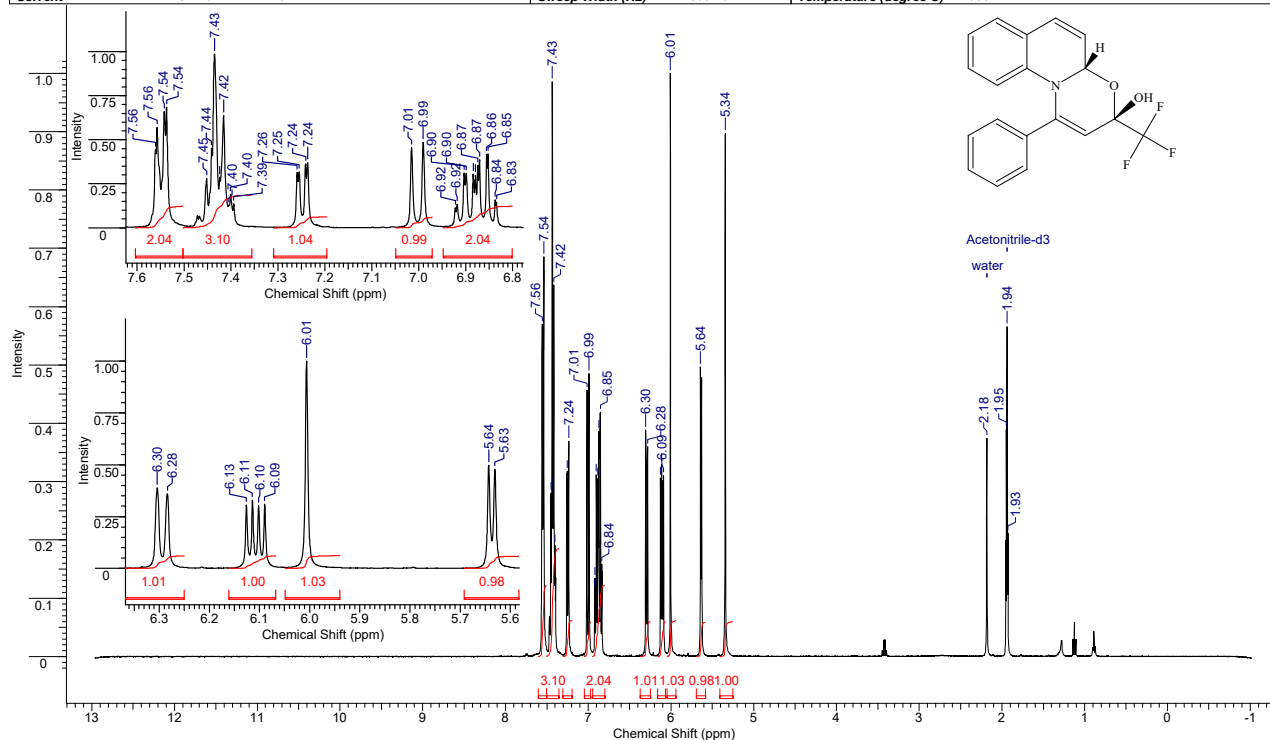<sup>1</sup>H NMR spectrum of (3R\*,4aR\*)-3a (400.1 MHz, CD<sub>3</sub>CN)FW 345.3152 Formula C<sub>19</sub>H<sub>14</sub>F<sub>3</sub>NO<sub>2</sub>

|                        |          |                        |             |                       |                                                                       |
|------------------------|----------|------------------------|-------------|-----------------------|-----------------------------------------------------------------------|
| Acquisition Time (sec) | 1.5000   | Date                   | Jun 26 2017 | File Name             | D:\BN\output\F19\F_2017\2017.06.26\BM-1114-k2_20170626_01\FLUORINE_01 |
| Frequency (MHz)        | 376.31   | Nucleus                | 19F         | Number of Transients  | 16                                                                    |
| Points Count           | 262144   | Pulse Sequence         | s2pul       | Original Points Count | 133929                                                                |
| Sweep Width (Hz)       | 89285.71 | Temperature (degree C) | 25.000      | Solvent               | ACETONITRILE-D3                                                       |

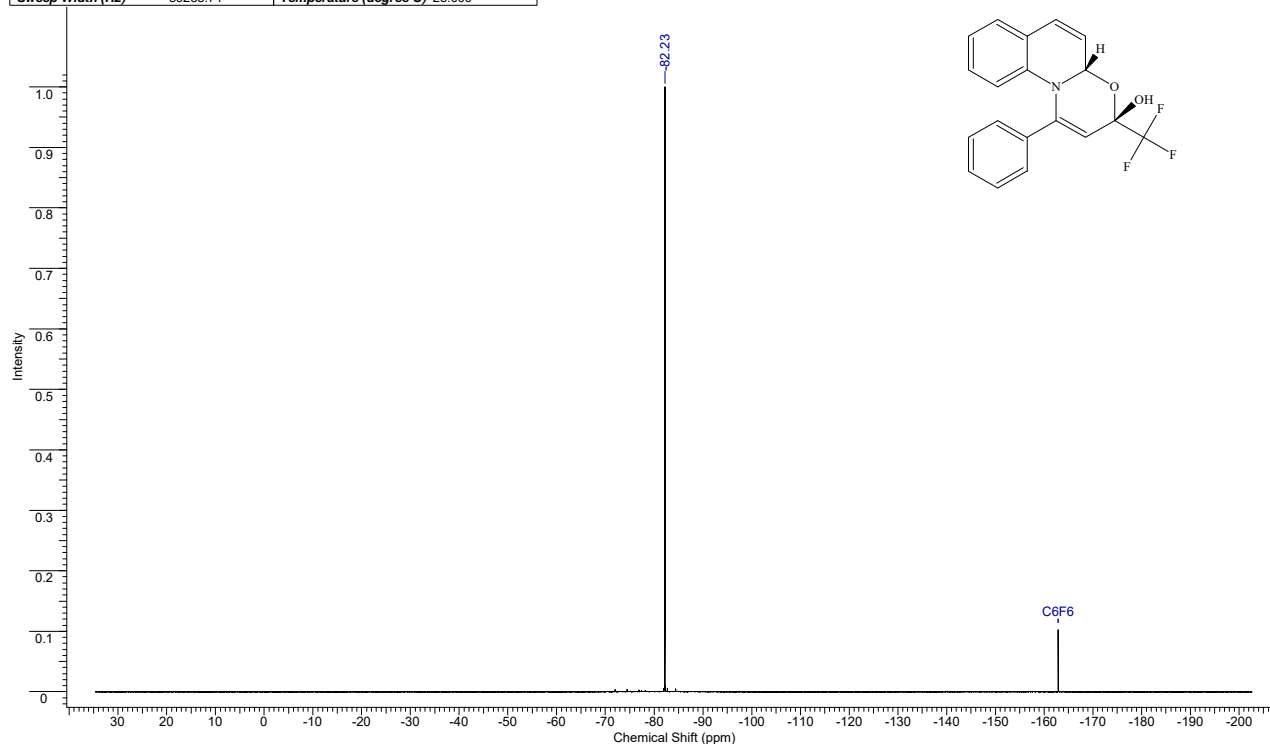<sup>19</sup>F NMR spectrum of (3R\*,4aR\*)-3a (376.3 MHz, CD<sub>3</sub>CN)

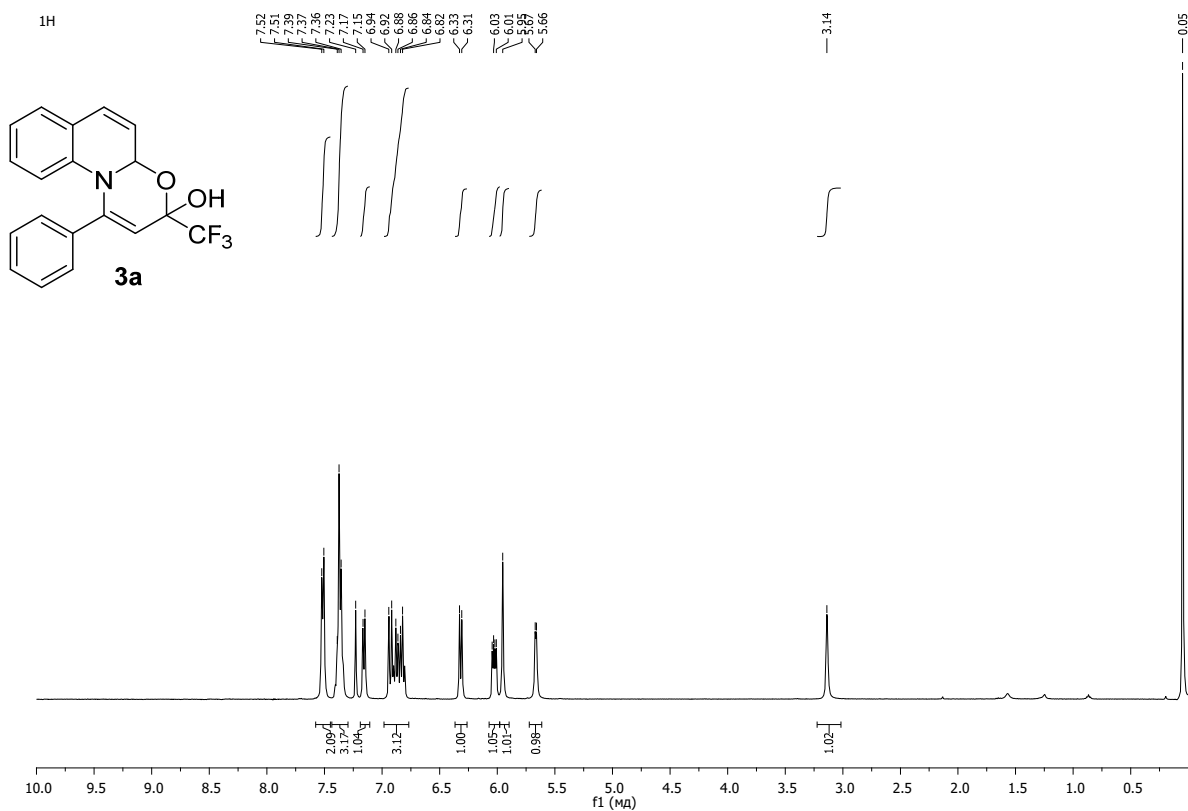

<sup>1</sup>H NMR spectrum of (3*R*\*,4*aR*\*)-**3a** (400.1 MHz, CDCl<sub>3</sub>)

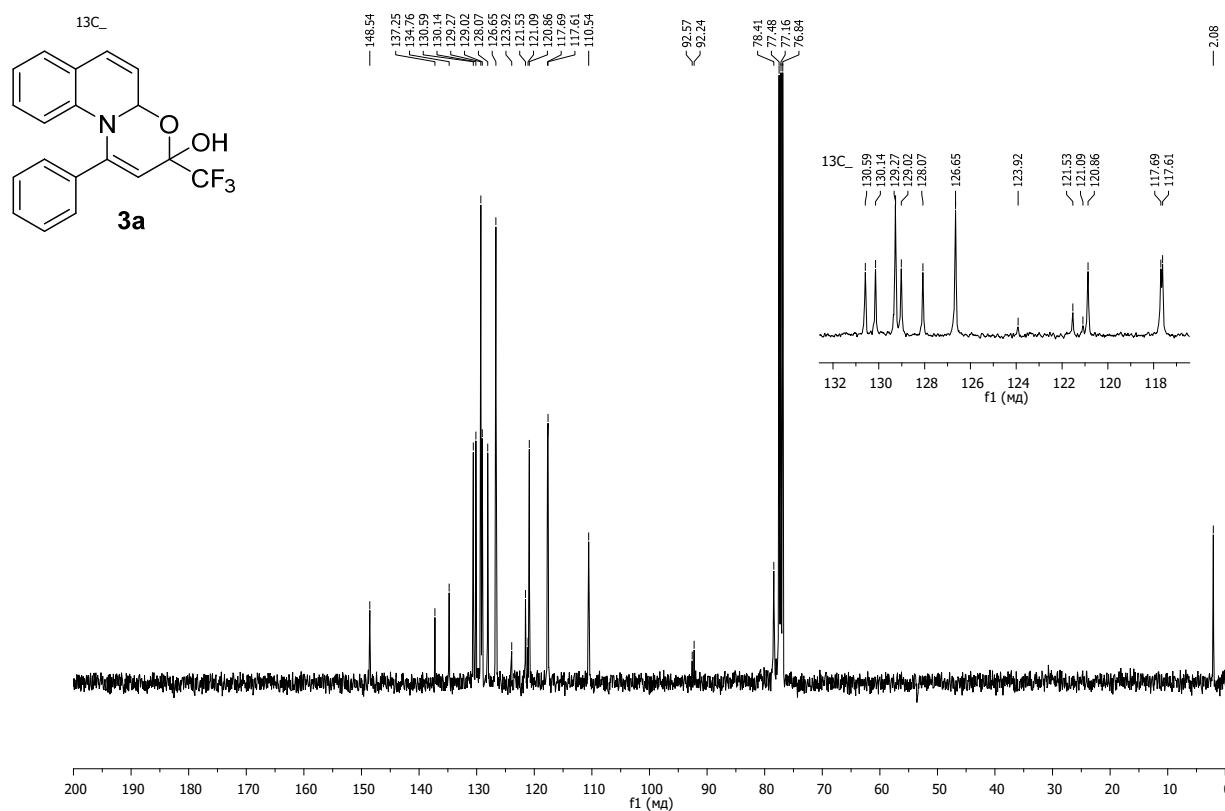

<sup>13</sup>C NMR spectrum of (3*R*\*,4*aR*\*)-**3a** (100.6 MHz, CDCl<sub>3</sub>)

19F  
F19

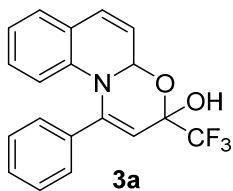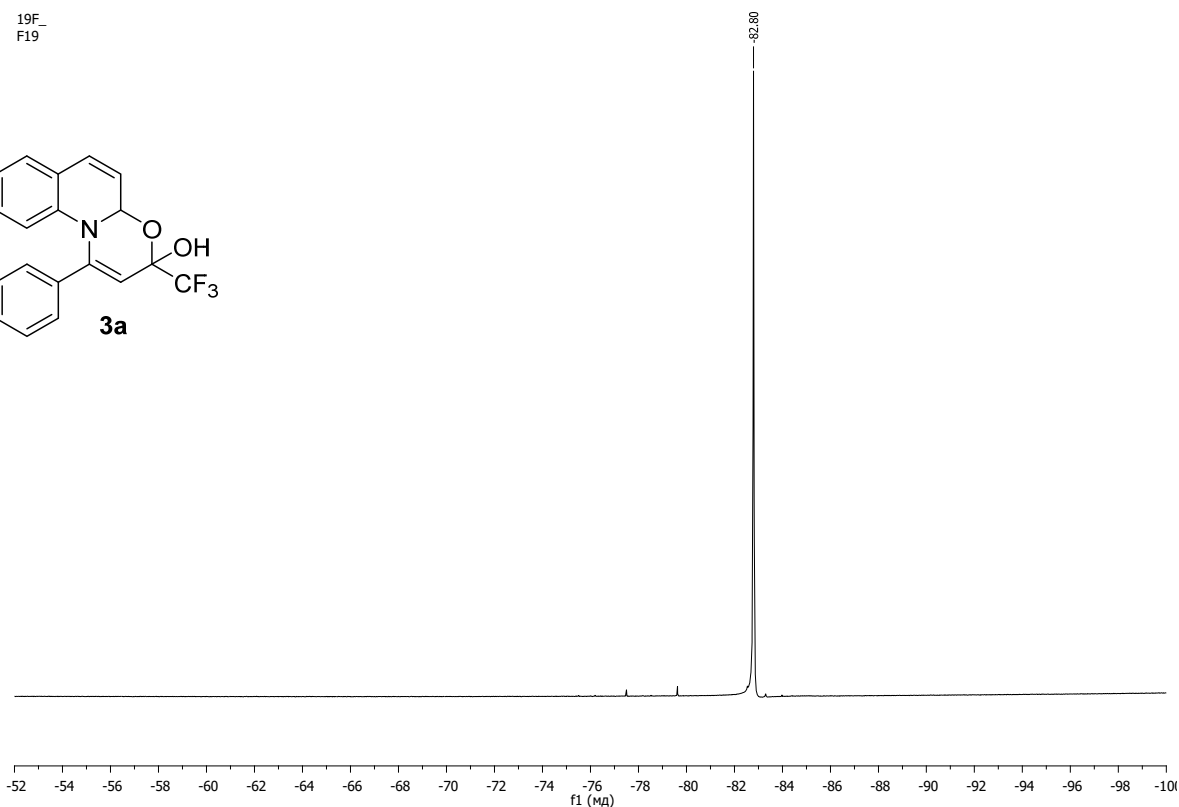

<sup>19</sup>F NMR spectrum of (3*R*\*,4*aR*\*)-**3a** (376.5 MHz, CDCl<sub>3</sub>)

25 Jan 2018

FW 359.3418 Formula C<sub>20</sub>H<sub>16</sub>F<sub>3</sub>NO<sub>2</sub>

|                        |                                                        |                      |                      |                       |                      |
|------------------------|--------------------------------------------------------|----------------------|----------------------|-----------------------|----------------------|
| Acquisition Time (sec) | 2.5559                                                 | Comment              | Imported from UXNMR. | Date                  | 07 Jul 2017 15:26:04 |
| File Name              | D:\Comp_316\BN\output\2017\07.ep.e\BM-1125-a.H_001001r |                      |                      | Frequency (MHz)       | 400.13               |
| Nucleus                | 1H                                                     | Number of Transients | 4                    | Original Points Count | 16384                |
| Pulse Sequence         | zg30                                                   | Solvent              | ACETONITRILE-D3      | Points Count          | 65536                |
| Temperature (degree C) | 27.000                                                 |                      |                      | Sweep Width (Hz)      | 6410.26              |

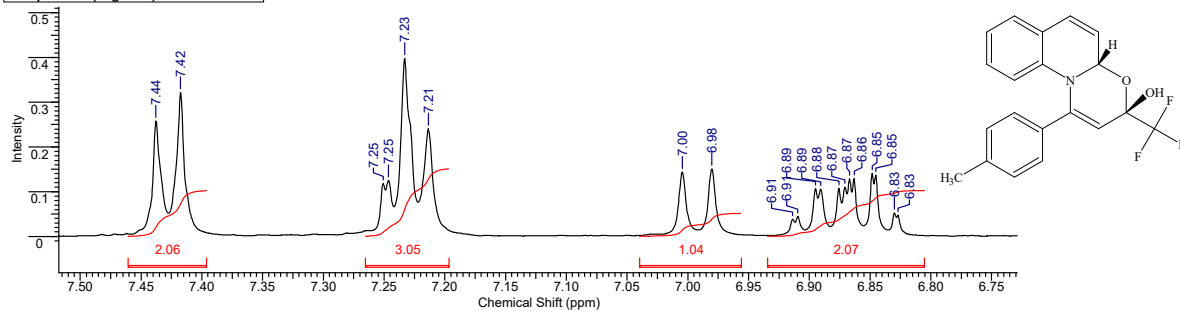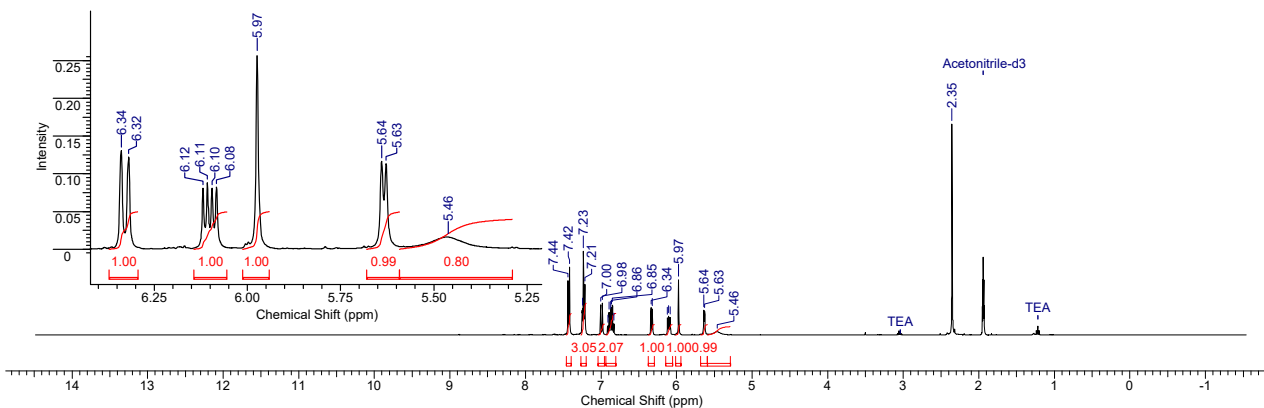

<sup>1</sup>H NMR spectrum of (3*R*\*,4*aR*\*)-**3b** (400.1 MHz, CD<sub>3</sub>CN)

FW 359.3418 Formula C<sub>20</sub>H<sub>16</sub>F<sub>3</sub>NO<sub>2</sub>

|                        |                                               |                       |                      |                        |                      |
|------------------------|-----------------------------------------------|-----------------------|----------------------|------------------------|----------------------|
| Acquisition Time (sec) | 0.4999                                        | Comment               | Imported from UXMNR. | Date                   | 29 Jun 2017 11:51:02 |
| File Name              | D:\BN\output\2017\06.ep i \IBM-1125.C_002001r | Frequency (MHz)       | 100.61               | Nucleus                | <sup>13</sup> C      |
| Number of Transients   | 64                                            | Original Points Count | 12076                | Pulse Sequence         | zgpg30               |
| Solvent                | CHLOROFORM-D                                  | Sweep Width (Hz)      | 24154.59             | Temperature (degree C) | 27.000               |

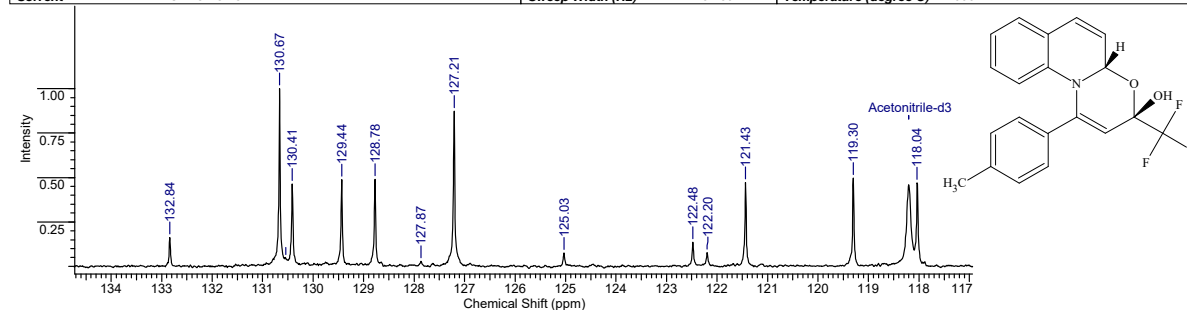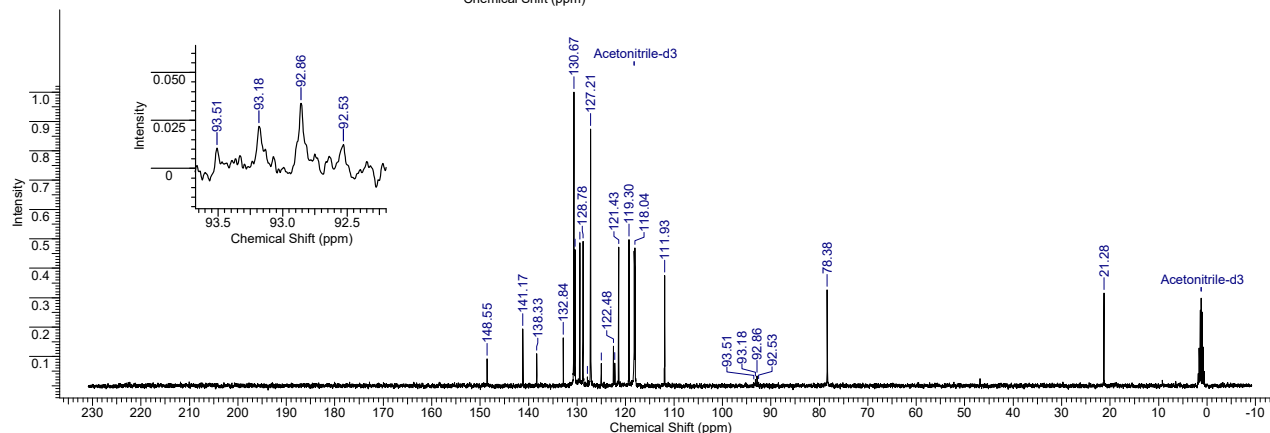<sup>13</sup>C NMR spectrum of (3R\*,4aR\*)-3b (100.6 MHz, CD<sub>3</sub>CN)FW 359.3418 Formula C<sub>20</sub>H<sub>16</sub>F<sub>3</sub>NO<sub>2</sub>

|                        |           |                        |                 |                       |                                                                                 |
|------------------------|-----------|------------------------|-----------------|-----------------------|---------------------------------------------------------------------------------|
| Acquisition Time (sec) | 2.6214    | Date                   | Jun 29 2017     | File Name             | D:\BN\Docs (BN)\vasily\SPEC_BM_F\2017.07.06_F\BM-1125-F_20170629_01\FLUORINE_01 |
| Frequency (MHz)        | 376.31    | Nucleus                | <sup>19</sup> F | Number of Transients  | 8                                                                               |
| Points Count           | 262144    | Pulse Sequence         | s2pul           | Original Points Count | 262144                                                                          |
| Sweep Width (Hz)       | 100000.00 | Temperature (degree C) | 22.000          | Solvent               | ACETONITRILE-D3                                                                 |

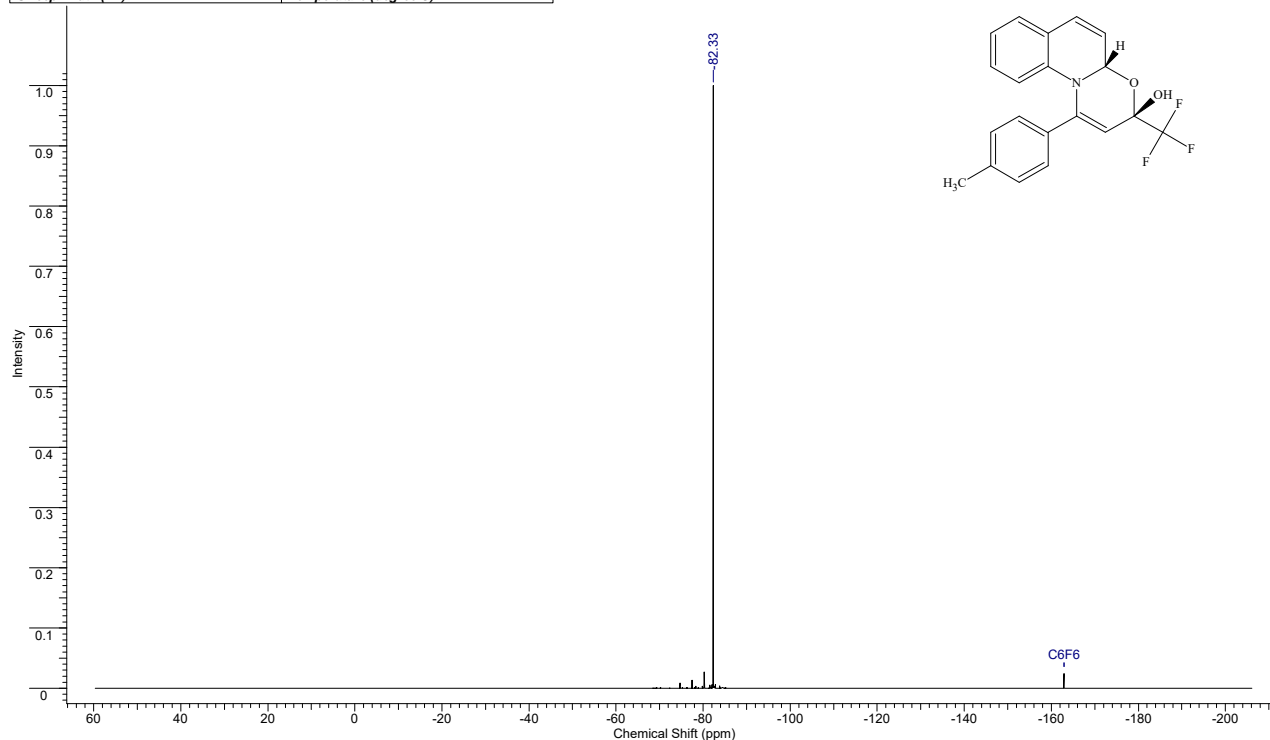<sup>19</sup>F NMR spectrum of (3R\*,4aR\*)-3b (376.3 MHz, CD<sub>3</sub>CN)

FW 373.3684 Formula C<sub>21</sub>H<sub>18</sub>F<sub>3</sub>NO<sub>2</sub>

| Acquisition Time (sec) | 2.9295                                                 | Comment               | Imported from UXNMR. | Date                   | 27 Jun 2017 22:49:18 |
|------------------------|--------------------------------------------------------|-----------------------|----------------------|------------------------|----------------------|
| File Name              | D:\BN\output\2017\06\epi\0\BM-1074-1\BM-1074-1_001001r | Frequency (MHz)       | 400.13               | Nucleus                | <sup>1</sup> H       |
| Number of Transients   | 8                                                      | Original Points Count | 16384                | Points Count           | 65536                |
| Solvent                | ACETONITRILE-D <sub>3</sub>                            | Sweep Width (Hz)      | 5592.84              | Pulse Sequence         | zg30                 |
|                        |                                                        |                       |                      | Temperature (degree C) | 27.000               |

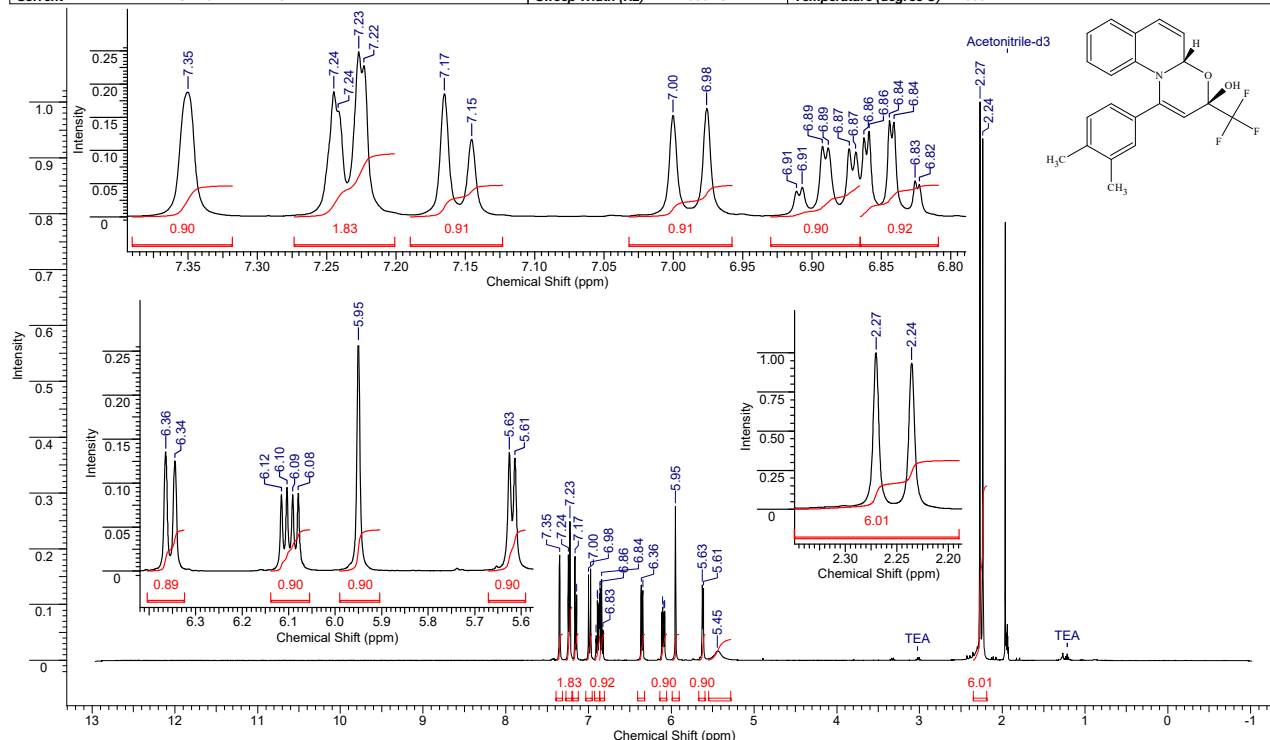<sup>1</sup>H NMR spectrum of (3*R*\*,4*aR*\*)-3c (400.1 MHz, CD<sub>3</sub>CN)FW 373.3684 Formula C<sub>21</sub>H<sub>18</sub>F<sub>3</sub>NO<sub>2</sub>

| Acquisition Time (sec) | 0.6783                                                 | Comment               | Imported from UXNMR. | Date                   | 27 Jun 2017 23:01:30 |
|------------------------|--------------------------------------------------------|-----------------------|----------------------|------------------------|----------------------|
| File Name              | D:\BN\output\2017\06\epi\0\BM-1074-1\BM-1074-1_002001r | Frequency (MHz)       | 100.61               | Nucleus                | <sup>13</sup> C      |
| Number of Transients   | 200                                                    | Original Points Count | 16384                | Points Count           | 131072               |
| Solvent                | ACETONITRILE-D <sub>3</sub>                            | Sweep Width (Hz)      | 24154.59             | Pulse Sequence         | zgpg30               |
|                        |                                                        |                       |                      | Temperature (degree C) | 27.000               |

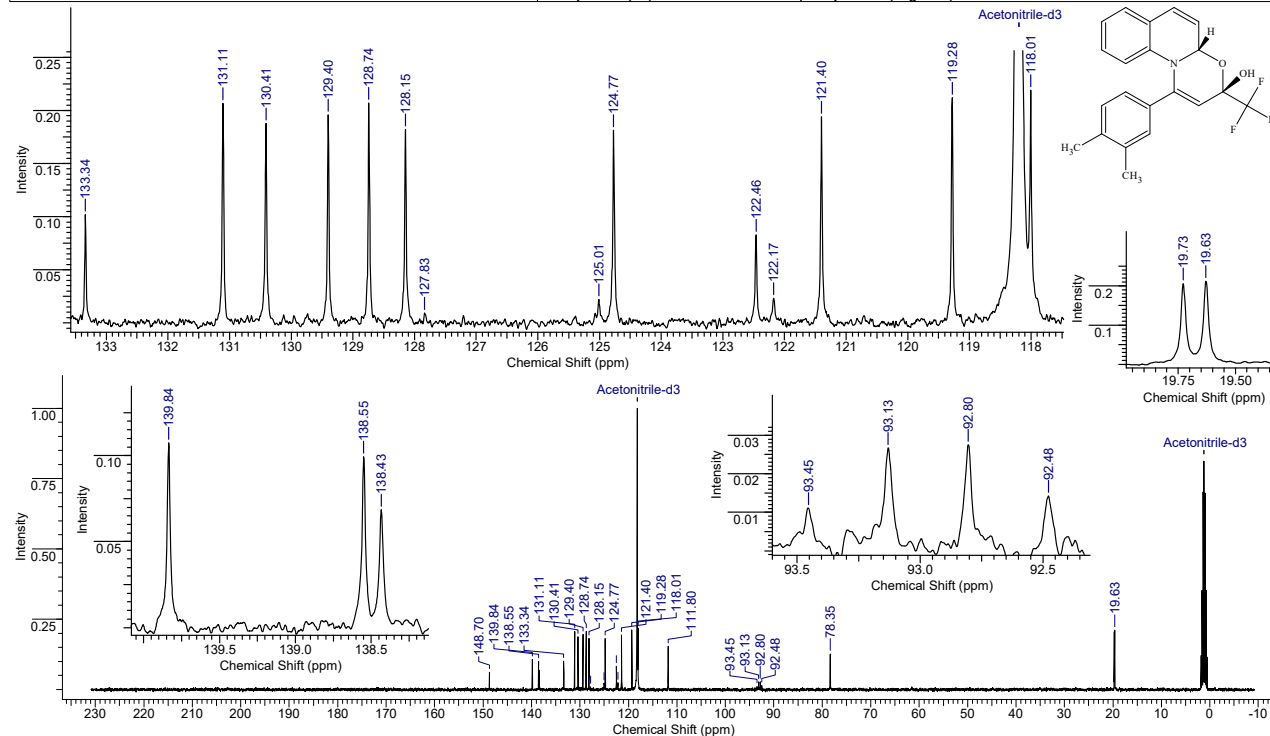<sup>13</sup>C NMR spectrum of (3*R*\*,4*aR*\*)-3c (100.6 MHz, CD<sub>3</sub>CN)

FW 373.3684 Formula C<sub>27</sub>H<sub>18</sub>F<sub>3</sub>NO<sub>2</sub>

| Acquisition Time (sec) | 1.5000                                                                         | Comment                | STANDARD FLUORINE PARAMETERS | Date                  | Jun 28 2017 |
|------------------------|--------------------------------------------------------------------------------|------------------------|------------------------------|-----------------------|-------------|
| File Name              | D:\BN\Docs (BN)\vasilly\SPEC_BM_F\2017.07.06_FBM-1074-1_20170628_01FLUORINE_01 | Frequency (MHz)        | 376.31                       | Points Count          | 262144      |
| Nucleus                | 19F                                                                            | Number of Transients   | 16                           | Original Points Count | 133929      |
| Pulse Sequence         | s2pul                                                                          | Solvent                | ACETONITRILE-D3              | Sweep Width (Hz)      | 89285.71    |
|                        |                                                                                | Temperature (degree C) | 25.000                       |                       |             |

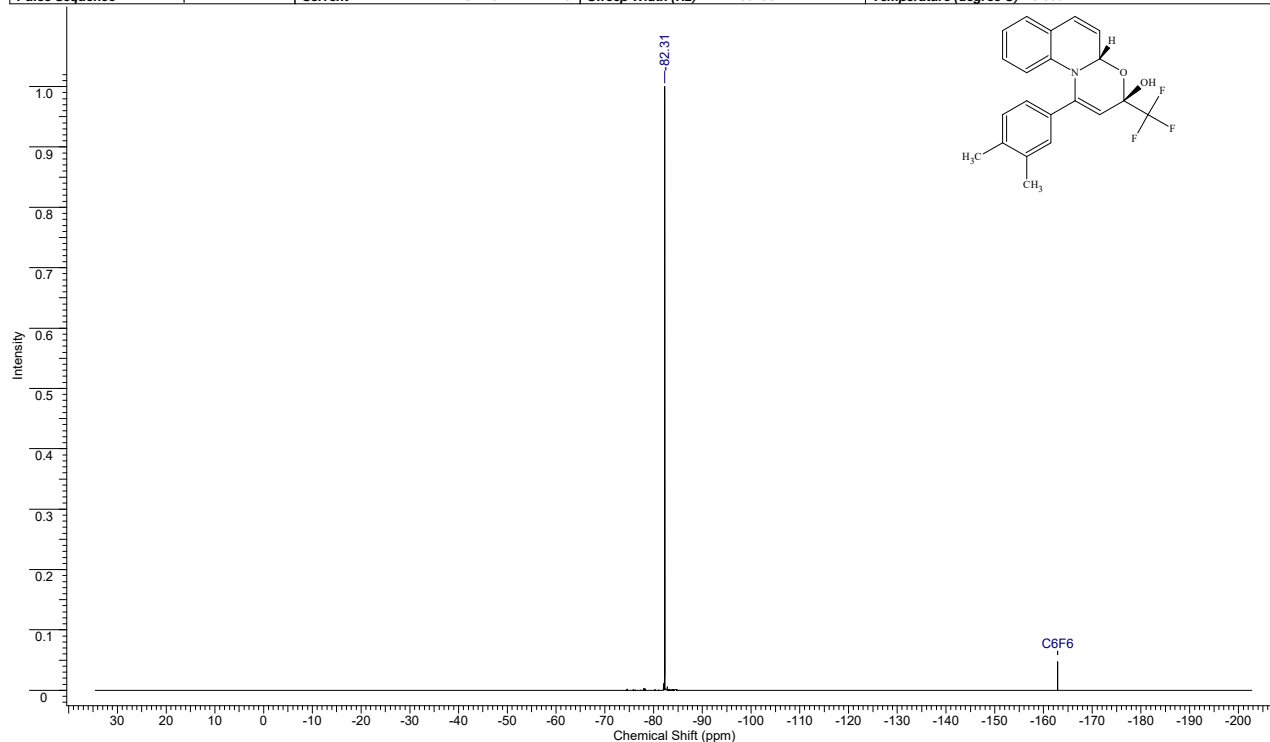FW 401.4215 Formula C<sub>23</sub>H<sub>22</sub>F<sub>3</sub>NO<sub>2</sub>

| Acquisition Time (sec) | 2.5559                                        | Comment                | Imported from UXXNMR | Date           | 29 Jun 2017 12:19:14 |
|------------------------|-----------------------------------------------|------------------------|----------------------|----------------|----------------------|
| File Name              | D:\BN\output\2017\06\6p i 0\BM-1118.H_001001r | Frequency (MHz)        | 400.13               | Nucleus        | 1H                   |
| Original Points Count  | 16384                                         | Points Count           | 65536                | Pulse Sequence | zg30                 |
| Sweep Width (Hz)       | 6410.26                                       | Temperature (degree C) | 27.000               | Solvent        | ACETONITRILE-D3      |

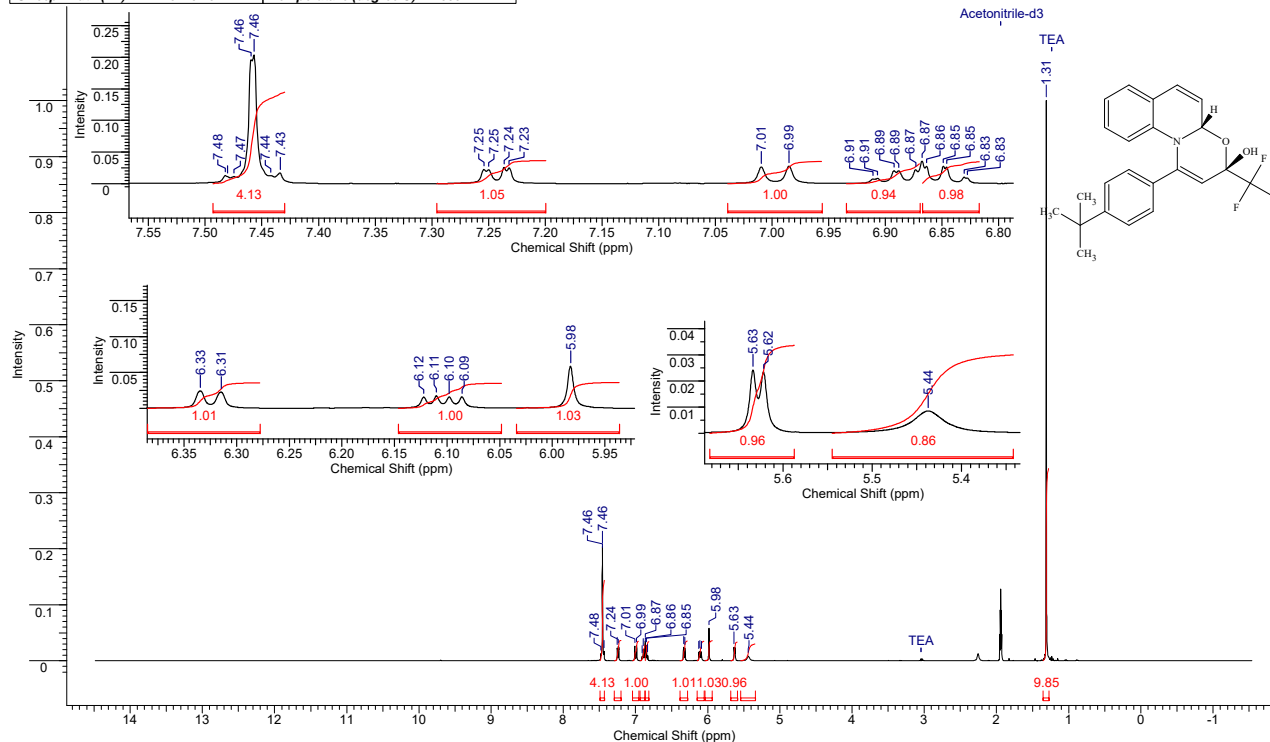



FW 401.4215 Formula C<sub>23</sub>H<sub>22</sub>F<sub>3</sub>NO<sub>2</sub>

|                        |                                               |                       |                      |                        |                      |
|------------------------|-----------------------------------------------|-----------------------|----------------------|------------------------|----------------------|
| Acquisition Time (sec) | 0.4999                                        | Comment               | Imported from UXMNR. | Date                   | 29 Jun 2017 12:31:04 |
| File Name              | D:\BN\output\2017\06.ep i \IBM-1118.C_002001r | Frequency (MHz)       | 100.61               | Nucleus                | 13C                  |
| Number of Transients   | 409                                           | Original Points Count | 12076                | Points Count           | 65536                |
| Solvent                | CHLOROFORM-D                                  | Sweep Width (Hz)      | 24154.59             | Pulse Sequence         | zgpg30               |
|                        |                                               |                       |                      | Temperature (degree C) | 27.000               |

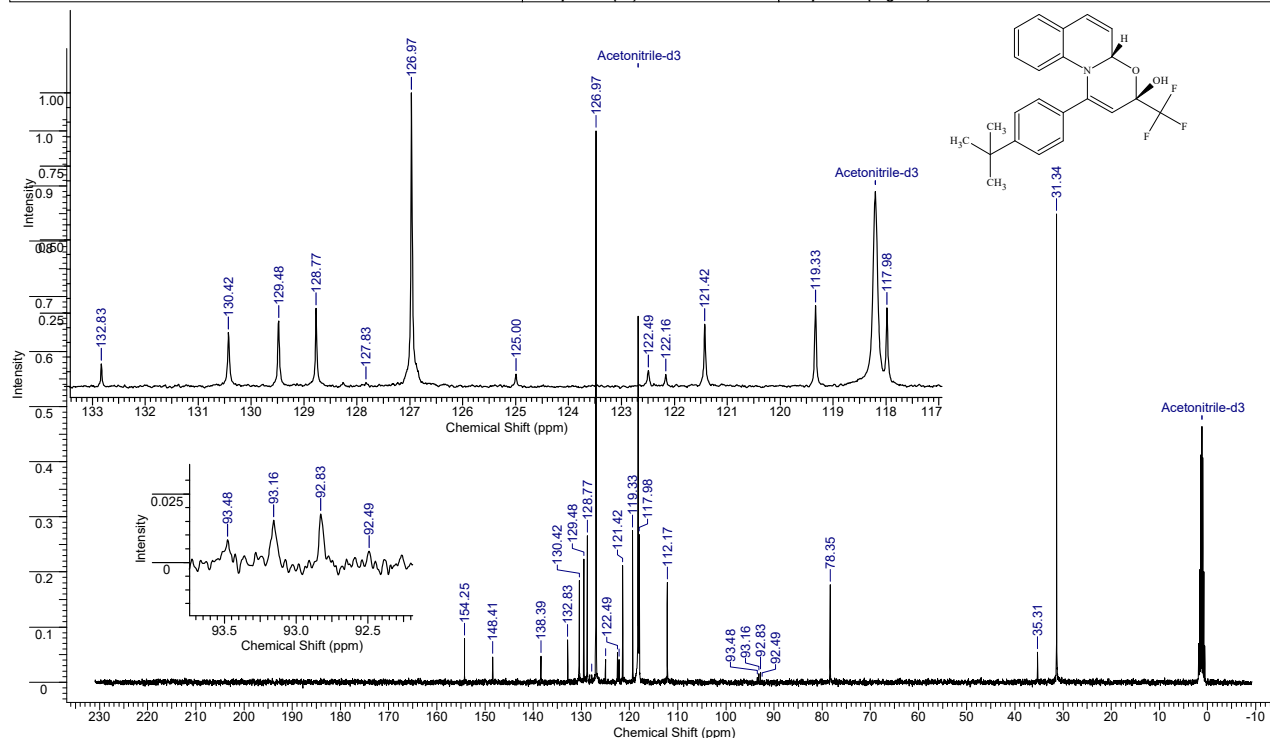<sup>13</sup>C NMR spectrum of (3R\*,4aR\*)-3d (100.6 MHz, CD<sub>3</sub>CN)FW 401.4215 Formula C<sub>23</sub>H<sub>22</sub>F<sub>3</sub>NO<sub>2</sub>

|                        |          |                        |             |                       |                                                                               |
|------------------------|----------|------------------------|-------------|-----------------------|-------------------------------------------------------------------------------|
| Acquisition Time (sec) | 1.0000   | Date                   | Jun 30 2017 | File Name             | D:\BN\Docs (BN)\vasily\SPEC_BM_F\2017.07.06_F\BM-1118_20170630_01\FLUORINE_01 |
| Frequency (MHz)        | 376.31   | Nucleus                | 19F         | Number of Transients  | 16                                                                            |
| Points Count           | 131072   | Pulse Sequence         | s2pul       | Original Points Count | 89286                                                                         |
| Sweep Width (Hz)       | 89285.71 | Temperature (degree C) | 25.000      | Solvent               | ACETONITRILE-D3                                                               |

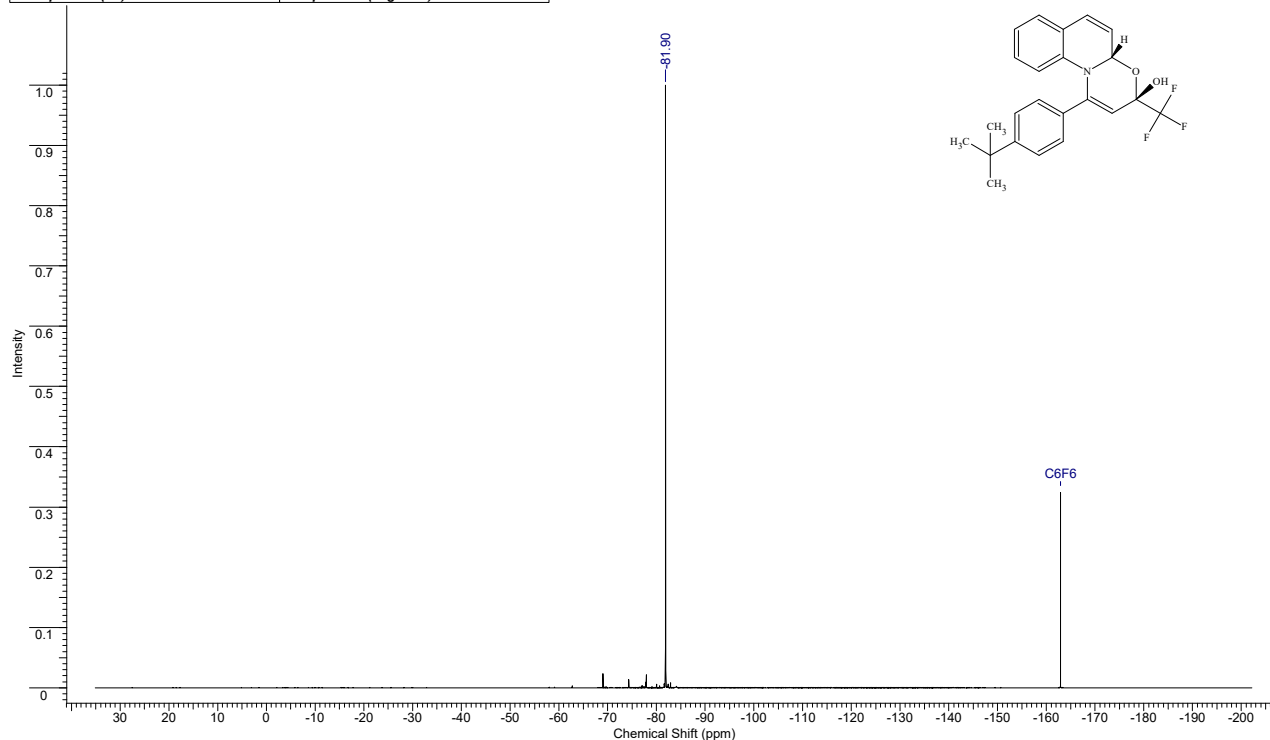<sup>19</sup>F NMR spectrum of (3R\*,4aR\*)-3d (376.3 MHz, CD<sub>3</sub>CN)

FW 375.3412 Formula C<sub>20</sub>H<sub>16</sub>F<sub>3</sub>NO<sub>3</sub>

| Acquisition Time (sec) | 2.5559                                       | Comment                | Imported from UXNMR. | Date           | 01 Jul 2017 13:55:32 |
|------------------------|----------------------------------------------|------------------------|----------------------|----------------|----------------------|
| File Name              | D:\BN\output\20170707.ep.e\BM-1124.H_001001r | Frequency (MHz)        | 400.13               | Nucleus        | <sup>1</sup> H       |
| Original Points Count  | 16384                                        | Points Count           | 65536                | Pulse Sequence | zg30                 |
| Sweep Width (Hz)       | 6410.26                                      | Temperature (degree C) | 27.000               | Solvent        | ACETONITRILE-D3      |

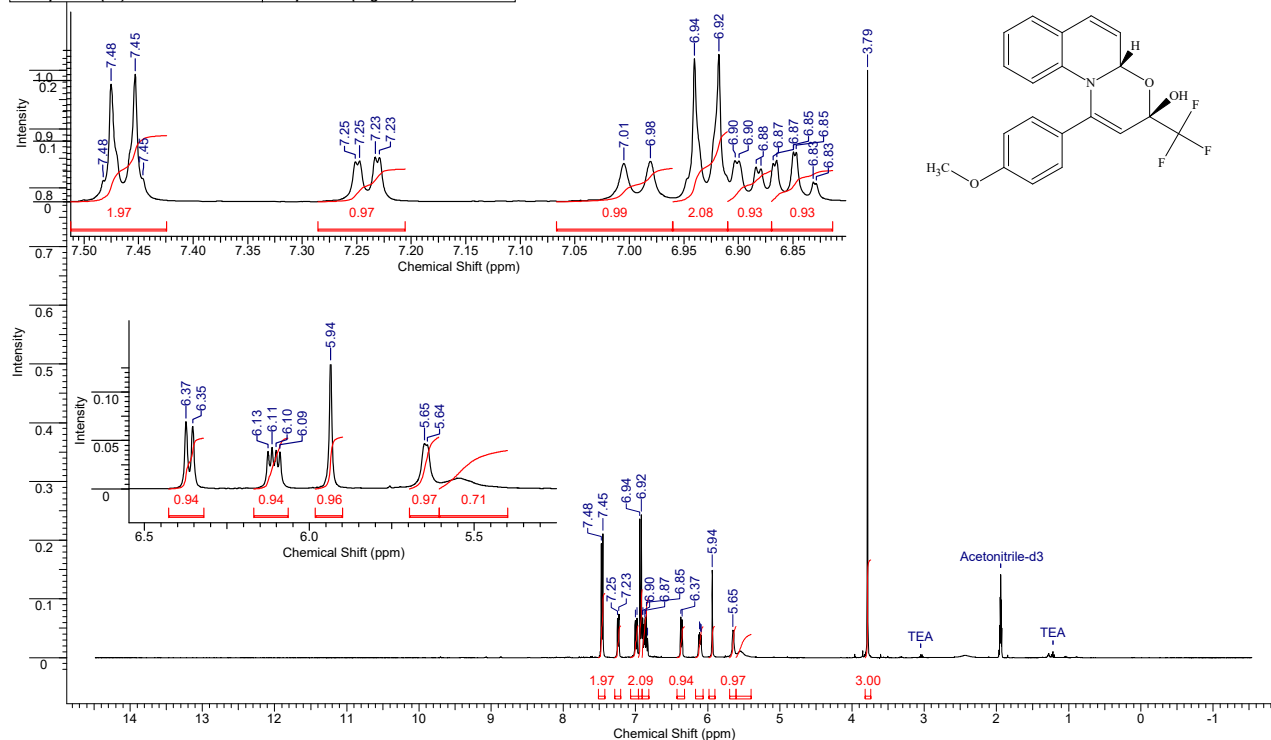**<sup>1</sup>H NMR spectrum of (3R\*,4aR\*)-3e (400.1 MHz, CD<sub>3</sub>CN)**FW 375.3412 Formula C<sub>20</sub>H<sub>16</sub>F<sub>3</sub>NO<sub>3</sub>

| Acquisition Time (sec) | 0.4999                                       | Comment                | Imported from UXNMR. | Date           | 01 Jul 2017 13:58:04 |
|------------------------|----------------------------------------------|------------------------|----------------------|----------------|----------------------|
| File Name              | D:\BN\output\20170707.ep.e\BM-1124.C_002001r | Frequency (MHz)        | 100.61               | Nucleus        | <sup>13</sup> C      |
| Number of Transients   | 64                                           | Original Points Count  | 12076                | Points Count   | 65536                |
| Solvent                | CHLOROFORM-D                                 | Sweep Width (Hz)       | 24154.59             | Pulse Sequence | zgpg30               |
|                        |                                              | Temperature (degree C) | 27.000               |                |                      |

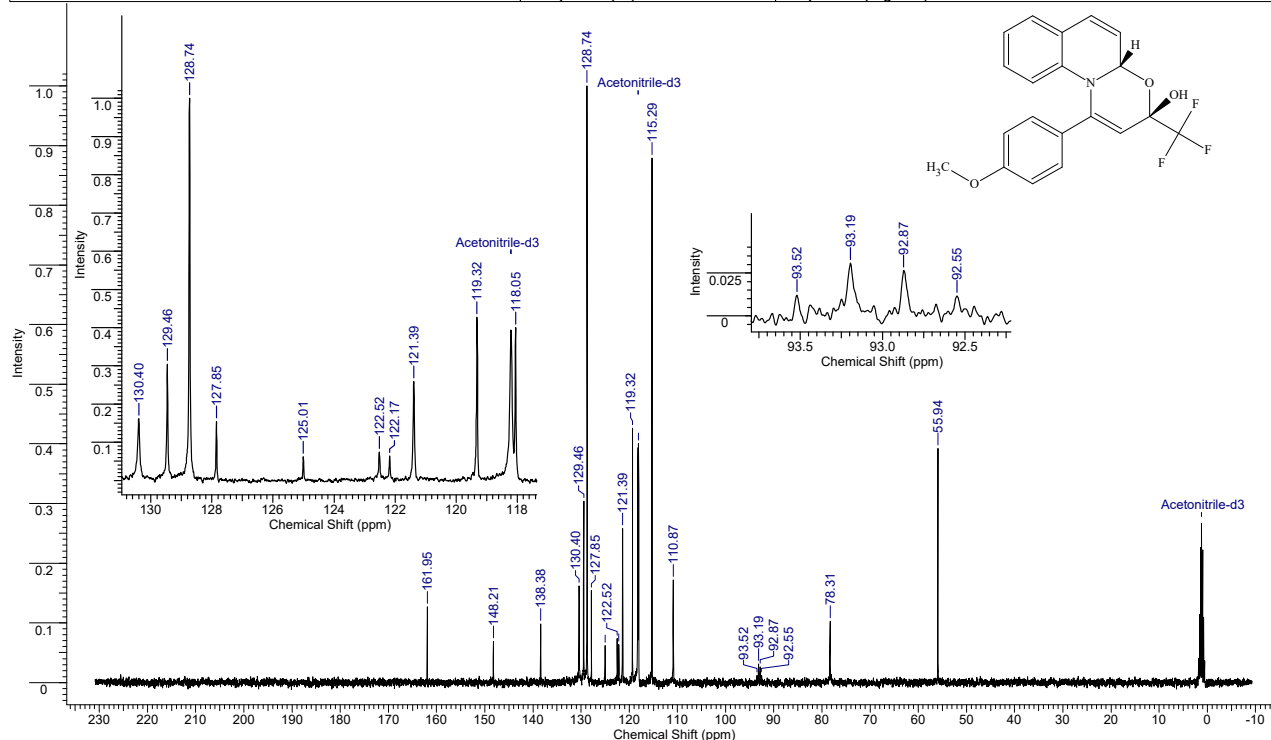**<sup>13</sup>C NMR spectrum of (3R\*,4aR\*)-3e (100.6 MHz, CD<sub>3</sub>CN)**

|                        |                                                                             |                        |                                                                |
|------------------------|-----------------------------------------------------------------------------|------------------------|----------------------------------------------------------------|
| FW                     | 375.3412                                                                    | Formula                | C <sub>20</sub> H <sub>16</sub> F <sub>3</sub> NO <sub>2</sub> |
| Acquisition Time (sec) | 1.5000                                                                      | Date                   | Jul 3 2017                                                     |
| File Name              | D:\BN\Docs (BN)\vasili\SPEC BM F\2017.07.06_FBM-1124_20170703_01FLUORINE_01 |                        |                                                                |
| Frequency (MHz)        | 376.31                                                                      | Nucleus                | 19F                                                            |
| Number of Transients   | 16                                                                          | Original Points Count  | 133929                                                         |
| Points Count           | 262144                                                                      | Pulse Sequence         | s2pul                                                          |
| Solvent                | ACETONITRILE-D3                                                             |                        |                                                                |
| Sweep Width (Hz)       | 89285.71                                                                    | Temperature (degree C) | 25.000                                                         |

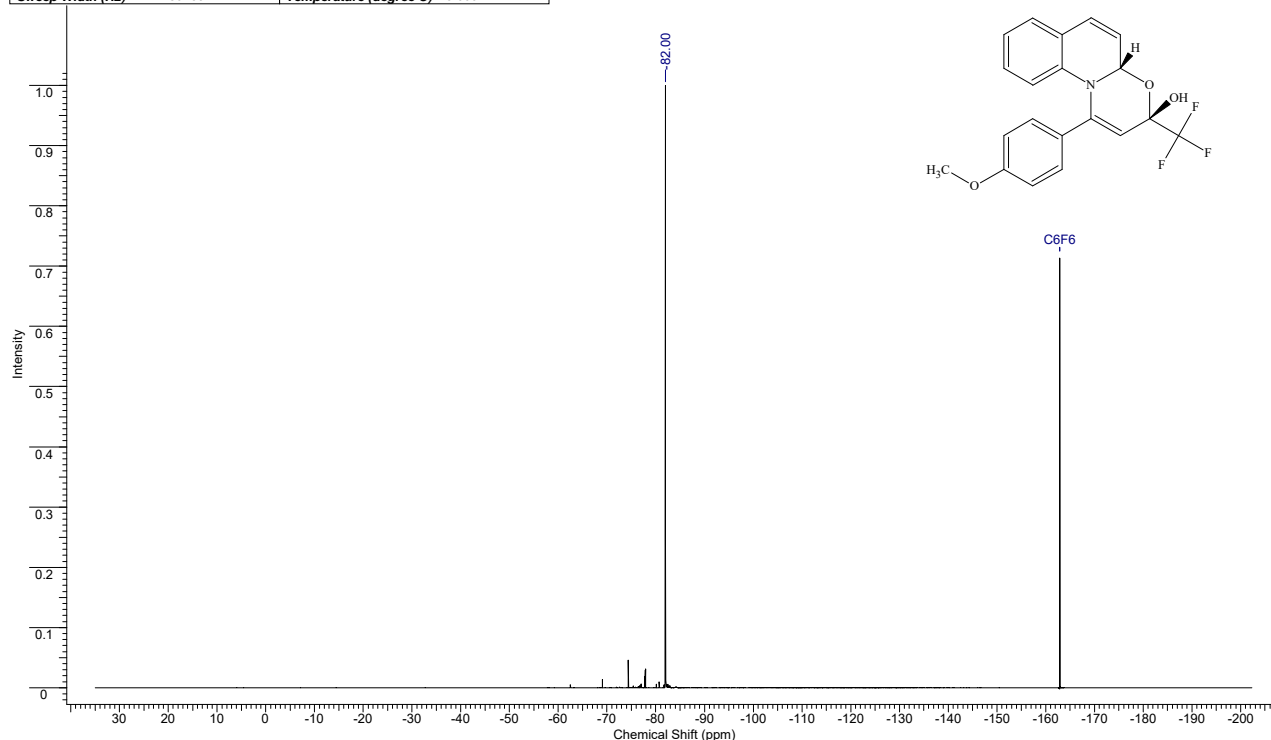

|                        |                                              |                        |                                                                  |
|------------------------|----------------------------------------------|------------------------|------------------------------------------------------------------|
| FW                     | 391.4078                                     | Formula                | C <sub>20</sub> H <sub>16</sub> F <sub>3</sub> NO <sub>2</sub> S |
| Acquisition Time (sec) | 2.5559                                       | Comment                | Imported from UGXNMR.                                            |
| Date                   | 29 Jun 2017 11:53:50                         |                        |                                                                  |
| File Name              | D:\BN\output\2017\06\epi\0\BM-1126.H_001001r |                        |                                                                  |
| Frequency (MHz)        | 400.13                                       | Nucleus                | 1H                                                               |
| Number of Transients   | 4                                            | Pulse Sequence         | zg30                                                             |
| Original Points Count  | 16384                                        | Points Count           | 65536                                                            |
| Solvent                | ACETONITRILE-D3                              |                        |                                                                  |
| Sweep Width (Hz)       | 6410.26                                      | Temperature (degree C) | 27.000                                                           |

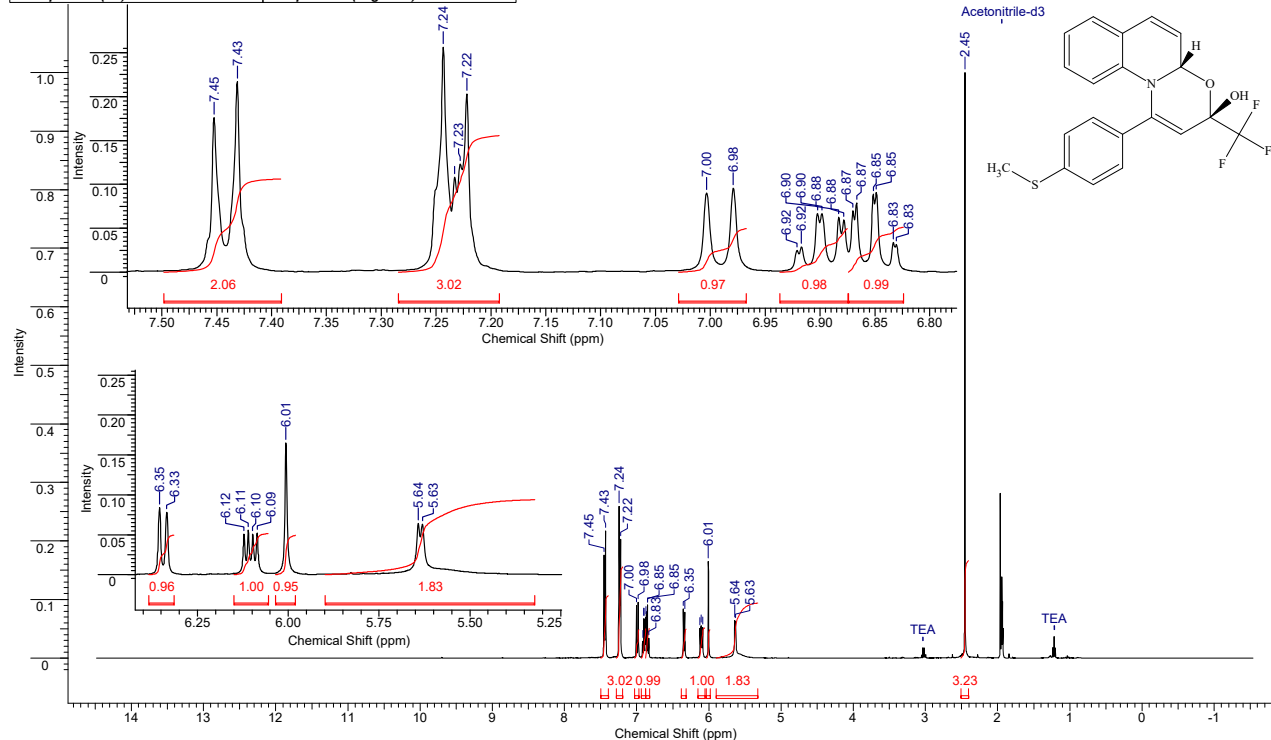

|    |          |         |                                                                  |
|----|----------|---------|------------------------------------------------------------------|
| FW | 391.4078 | Formula | C <sub>20</sub> H <sub>16</sub> F <sub>3</sub> NO <sub>2</sub> S |
|----|----------|---------|------------------------------------------------------------------|

|                        |                                               |                       |                      |                        |                      |
|------------------------|-----------------------------------------------|-----------------------|----------------------|------------------------|----------------------|
| Acquisition Time (sec) | 0.4999                                        | Comment               | Imported from UXNMR. | Date                   | 29 Jun 2017 11:55:58 |
| File Name              | D:\BN\output\2017\06.ep i \IBM-1126.C_002001r | Frequency (MHz)       | 100.61               | Nucleus                | 13C                  |
| Number of Transients   | 45                                            | Original Points Count | 12076                | Pulse Sequence         | zpgg30               |
| Solvent                | CHLOROFORM-D                                  | Sweep Width (Hz)      | 24154.59             | Temperature (degree C) | 27.000               |

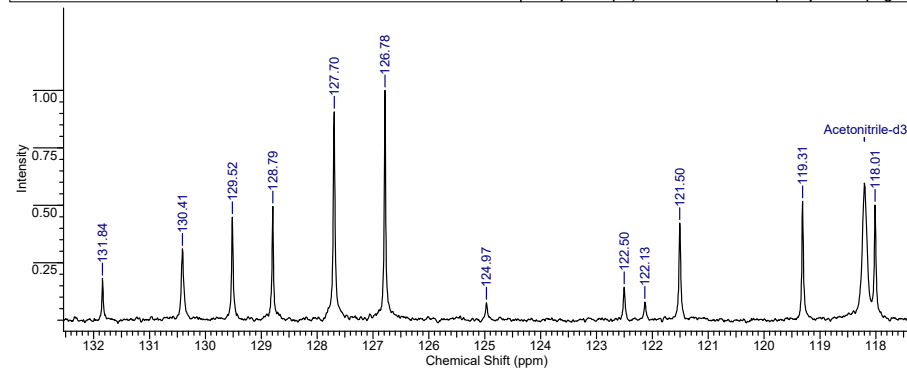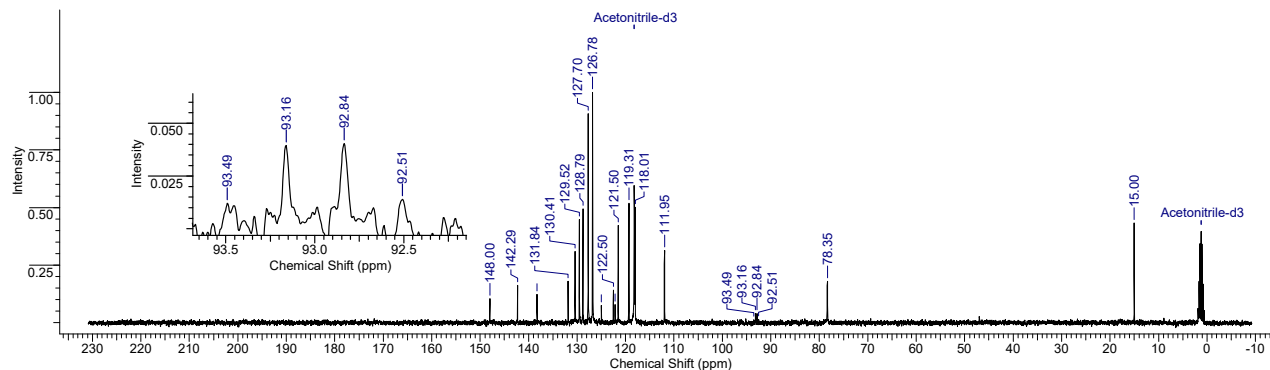

<sup>13</sup>C NMR spectrum of (3*R*\*,4*aR*\*)-3f (100.6 MHz, CD<sub>3</sub>CN)

|    |          |         |                                                                  |
|----|----------|---------|------------------------------------------------------------------|
| FW | 391.4078 | Formula | C <sub>20</sub> H <sub>16</sub> F <sub>3</sub> NO <sub>2</sub> S |
|----|----------|---------|------------------------------------------------------------------|

|                        |           |                        |             |                       |                                                                                 |
|------------------------|-----------|------------------------|-------------|-----------------------|---------------------------------------------------------------------------------|
| Acquisition Time (sec) | 2.6214    | Date                   | Jun 29 2017 | File Name             | D:\BN\Docs (BN)\vasily\SPEC BM F\2017.07.06_FIBM-1126-F_20170629_01\FLUORINE_01 |
| Frequency (MHz)        | 376.31    | Nucleus                | 19F         | Number of Transients  | 8                                                                               |
| Points Count           | 262144    | Pulse Sequence         | s2pul       | Original Points Count | 262144                                                                          |
| Sweep Width (Hz)       | 100000.00 | Temperature (degree C) | 22.000      | Solvent               | ACETONITRILE-D3                                                                 |

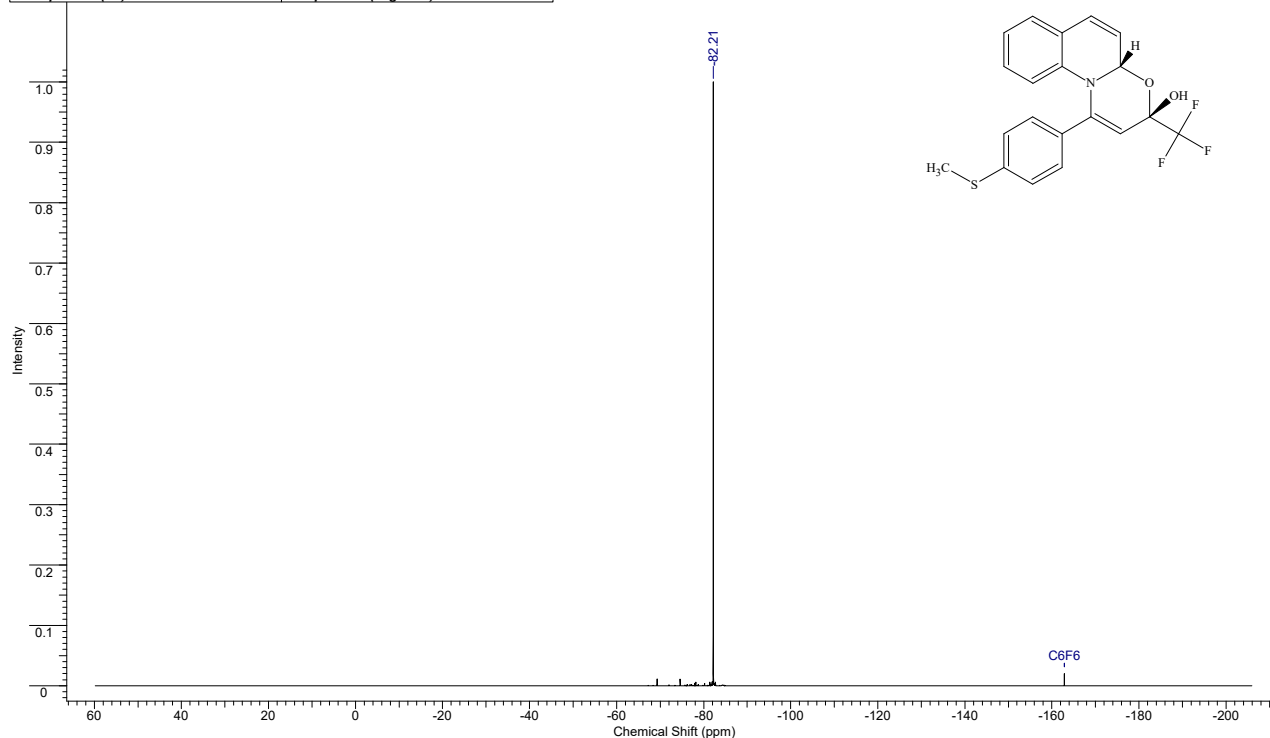

<sup>19</sup>F NMR spectrum of (3*R*\*,4*aR*\*)-3f (376.3 MHz, CD<sub>3</sub>CN)

|    |          |         |                                                                  |
|----|----------|---------|------------------------------------------------------------------|
| FW | 379.7600 | Formula | C <sub>19</sub> H <sub>13</sub> ClF <sub>3</sub> NO <sub>2</sub> |
|----|----------|---------|------------------------------------------------------------------|

| Acquisition Time (sec) | 2.5559                                       | Comment                | Imported from UXNMR. | Date           | 01 Jul 2017 13:43:36 |                      |                 |
|------------------------|----------------------------------------------|------------------------|----------------------|----------------|----------------------|----------------------|-----------------|
| File Name              | D:\BN\output\20170707.ep.e\BM-1123.H_001001r | Frequency (MHz)        | 400.13               | Nucleus        | 1H                   | Number of Transients | 4               |
| Original Points Count  | 16384                                        | Points Count           | 65536                | Pulse Sequence | zg30                 | Solvent              | ACETONITRILE-D3 |
| Sweep Width (Hz)       | 6410.26                                      | Temperature (degree C) | 27.000               |                |                      |                      |                 |

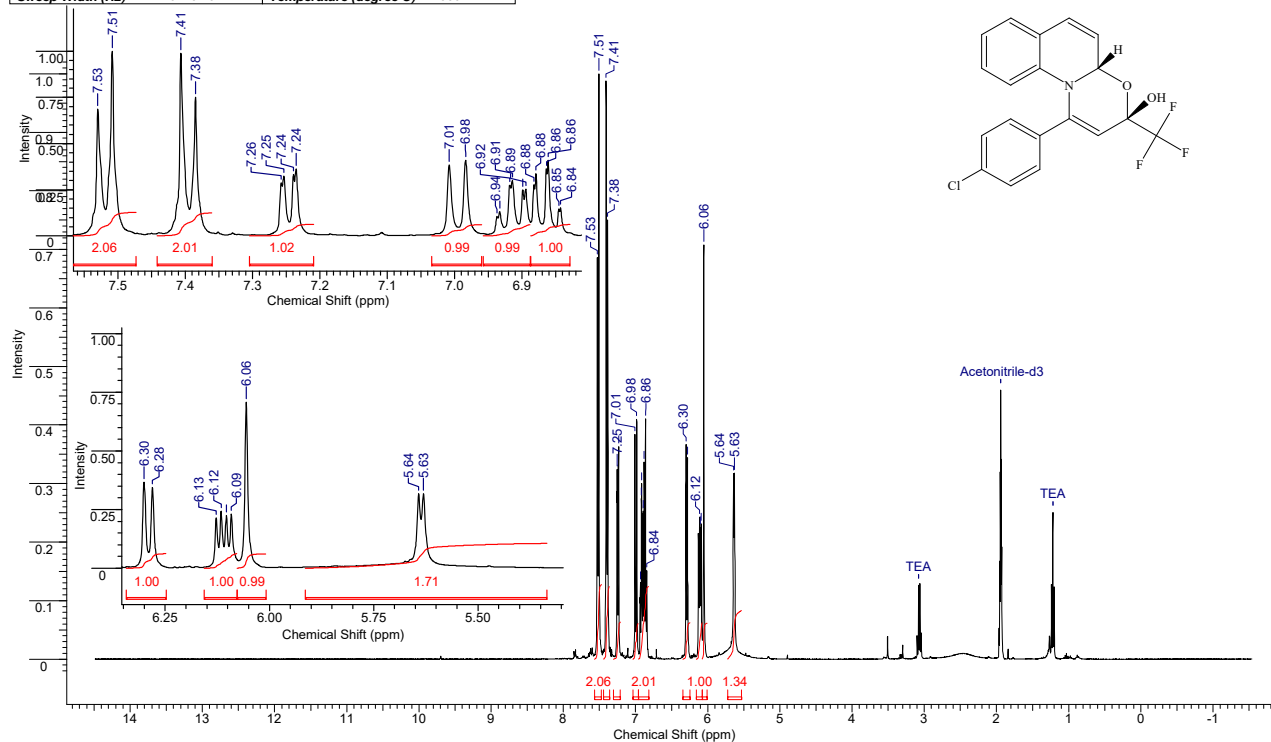

**<sup>1</sup>H NMR spectrum of (3R\*,4aR\*)-3g (400.1 MHz, CD<sub>3</sub>CN)**

|    |          |         |                                                                  |
|----|----------|---------|------------------------------------------------------------------|
| FW | 379.7600 | Formula | C <sub>19</sub> H <sub>13</sub> ClF <sub>3</sub> NO <sub>2</sub> |
|----|----------|---------|------------------------------------------------------------------|

| Acquisition Time (sec) | 0.4999                                       | Comment               | Imported from UXNMR. | Date                   | 01 Jul 2017 13:47:44 |
|------------------------|----------------------------------------------|-----------------------|----------------------|------------------------|----------------------|
| File Name              | D:\BN\output\20170707.ep.e\BM-1123.C_002001r | Frequency (MHz)       | 100.61               | Nucleus                | 13C                  |
| Number of Transients   | 64                                           | Original Points Count | 12076                | Pulse Sequence         | zgpg30               |
| Solvent                | CHLOROFORM-D                                 | Sweep Width (Hz)      | 24154.59             | Temperature (degree C) | 27.000               |

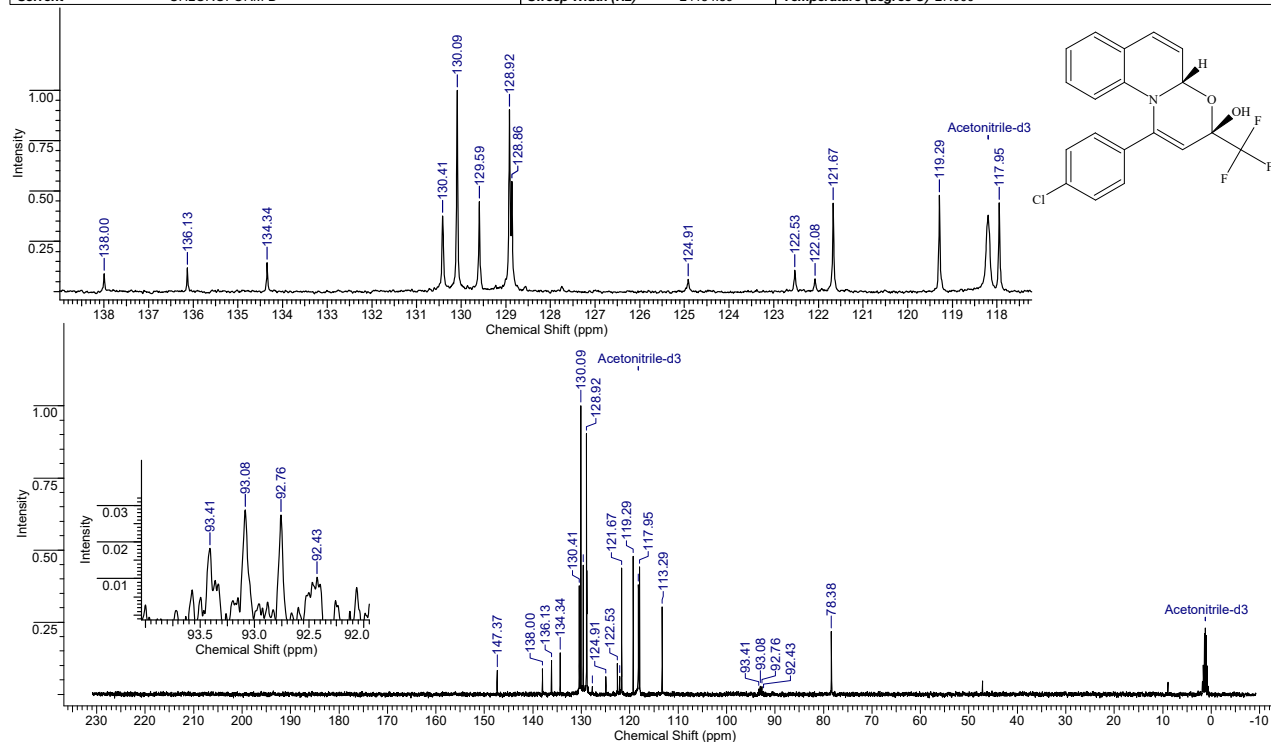

**<sup>13</sup>C NMR spectrum of (3R\*,4aR\*)-3g (100.6 MHz, CD<sub>3</sub>CN)**

|                        |                                                                    |                        |                                                                  |
|------------------------|--------------------------------------------------------------------|------------------------|------------------------------------------------------------------|
| FW                     | 379.7600                                                           | Formula                | C <sub>19</sub> H <sub>13</sub> ClF <sub>3</sub> NO <sub>2</sub> |
| Acquisition Time (sec) | 1.0000                                                             | Date                   | Jun 30 2017                                                      |
| Frequency (MHz)        | 376.31                                                             | Nucleus                | 19F                                                              |
| Points Count           | 131072                                                             | Pulse Sequence         | s2pul                                                            |
| Sweep Width (Hz)       | 89285.71                                                           | Temperature (degree C) | 25.000                                                           |
| File Name              | D:\BN\output\F19\F_2017\2017.06.30\BM-1123_20170630_01\FLUORINE_01 |                        |                                                                  |
| Number of Transients   | 16                                                                 |                        |                                                                  |
| Original Points Count  | 89286                                                              |                        |                                                                  |
| Solvent                | ACETONITRILE-D3                                                    |                        |                                                                  |

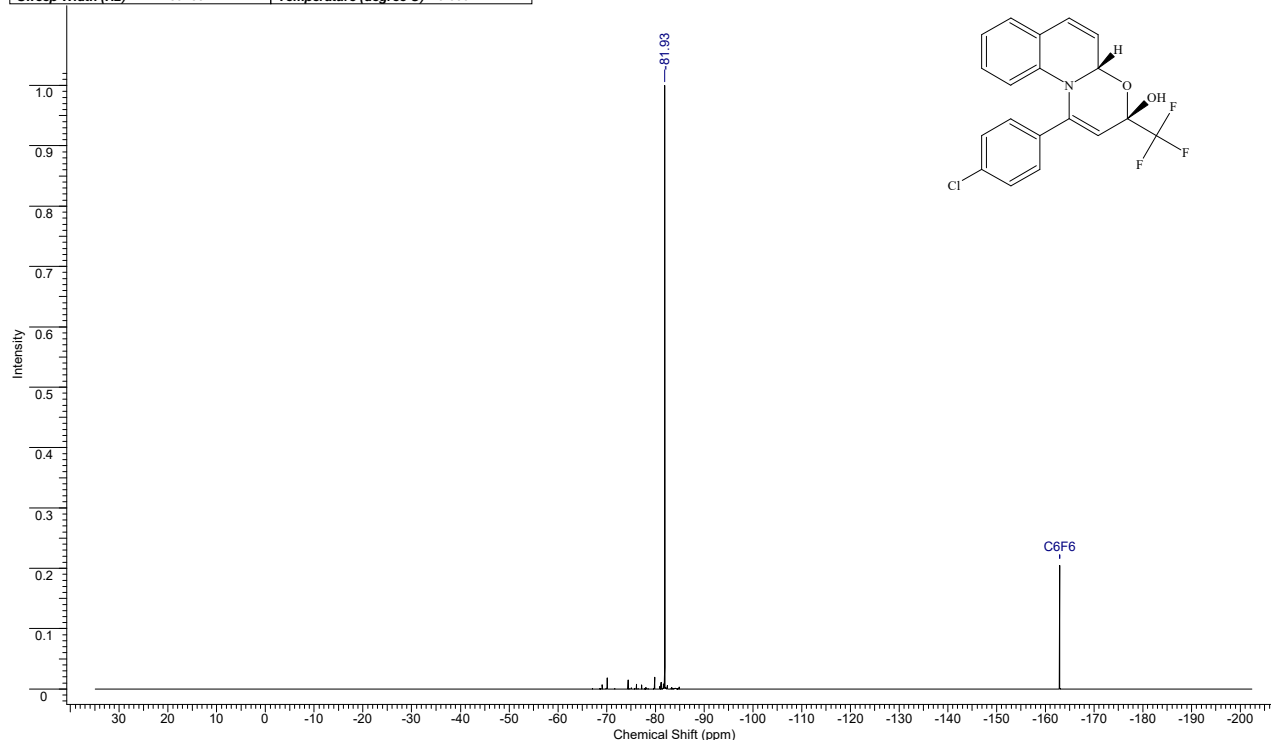

8 Jul 2017

|                        |                                                     |                        |                                                                  |
|------------------------|-----------------------------------------------------|------------------------|------------------------------------------------------------------|
| FW                     | 424.2113                                            | Formula                | C <sub>19</sub> H <sub>13</sub> BrF <sub>3</sub> NO <sub>2</sub> |
| Acquisition Time (sec) | 3.5479                                              | Date                   | 03 Jul 2017 11:28:52                                             |
| Frequency (MHz)        | 600.13                                              | Nucleus                | 1H                                                               |
| Points Count           | 131072                                              | Pulse Sequence         | zg30                                                             |
| Sweep Width (Hz)       | 10162.60                                            | Temperature (degree C) | 20.400                                                           |
| File Name              | D:\BN\output\2017\07.03\BM-1127 (1)\BM-1127_001001r |                        |                                                                  |
| Number of Transients   | 8                                                   |                        |                                                                  |
| Original Points Count  | 36056                                               |                        |                                                                  |
| Solvent                | ACETONITRILE-D3                                     |                        |                                                                  |

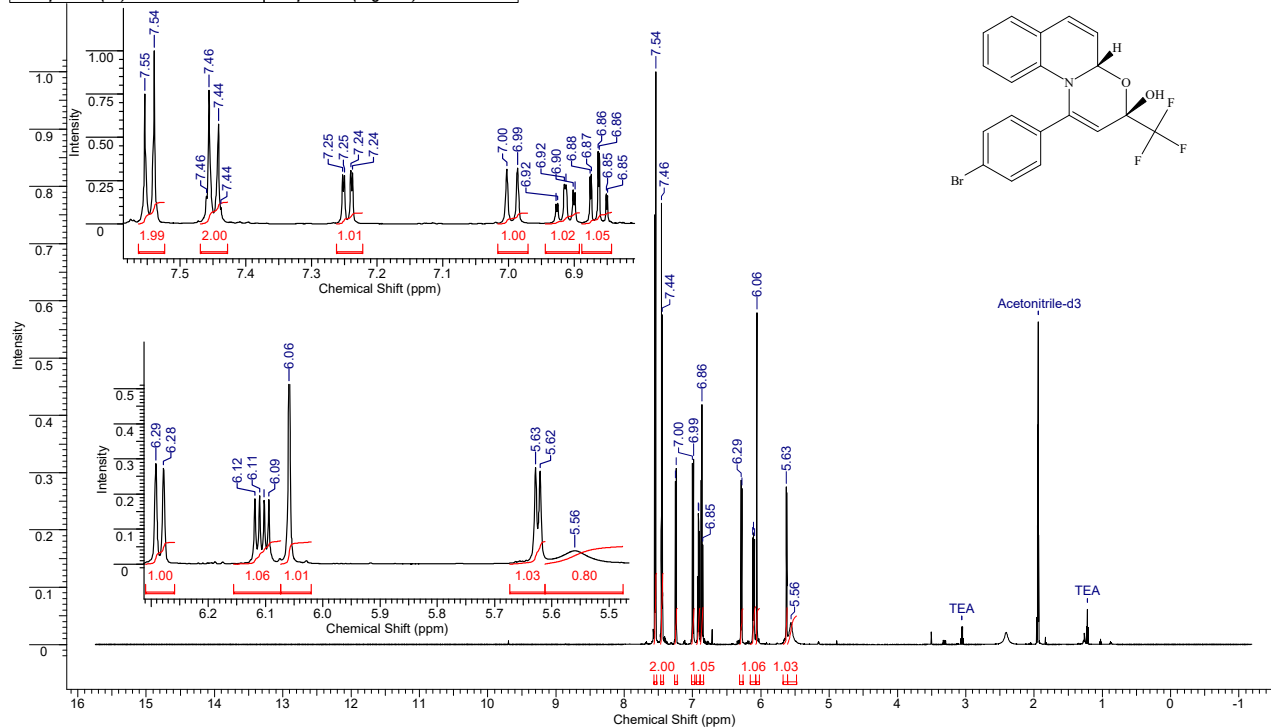

|    |          |         |                         |
|----|----------|---------|-------------------------|
| FW | 424.2113 | Formula | $C_{19}H_{13}BrF_3NO_2$ |
|----|----------|---------|-------------------------|

|                        |                                                       |                       |                      |                        |          |                |        |
|------------------------|-------------------------------------------------------|-----------------------|----------------------|------------------------|----------|----------------|--------|
| Acquisition Time (sec) | 0.4783                                                | Date                  | 03 Jul 2017 11:24:26 |                        |          |                |        |
| File Name              | D:\BN\output\201707.ep.eu\BM-1127 (1)\BM-1127_002001r | Frequency (MHz)       | 150.90               | Nucleus                | $^{13}C$ |                |        |
| Number of Transients   | 350                                                   | Original Points Count | 17983                | Points Count           | 32768    | Pulse Sequence | zgpg30 |
| Solvent                | ACETONITRILE-D3                                       | Sweep Width (Hz)      | 37593.98             | Temperature (degree C) | 25.100   |                |        |

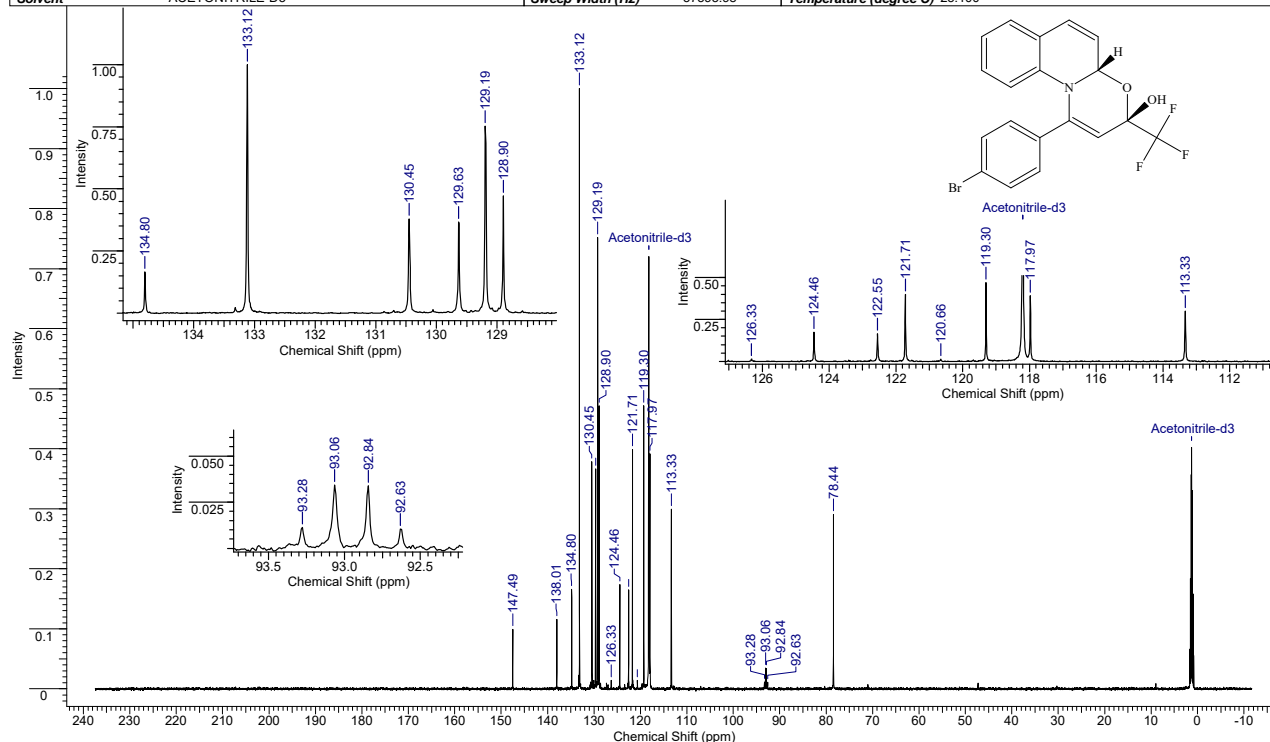

$^{13}C$  NMR spectrum of (3R\*,4aR\*)-3h (100.6 MHz,  $CD_3CN$ )

|    |          |         |                         |
|----|----------|---------|-------------------------|
| FW | 424.2113 | Formula | $C_{19}H_{13}BrF_3NO_2$ |
|----|----------|---------|-------------------------|

|                        |          |                        |            |                      |                                                                     |                       |       |
|------------------------|----------|------------------------|------------|----------------------|---------------------------------------------------------------------|-----------------------|-------|
| Acquisition Time (sec) | 0.7340   | Date                   | Jul 4 2017 | File Name            | D:\BN\output\F19\F 2017\2017.07.04\bm1127-f 20170704_01\FLUORINE_01 |                       |       |
| Frequency (MHz)        | 376.31   | Nucleus                | $^{19}F$   | Number of Transients | 1000                                                                | Original Points Count | 65536 |
| Points Count           | 65536    | Pulse Sequence         | s2pul      | Solvent              | ACETONITRILE-D3                                                     |                       |       |
| Sweep Width (Hz)       | 89285.71 | Temperature (degree C) | 25.000     |                      |                                                                     |                       |       |

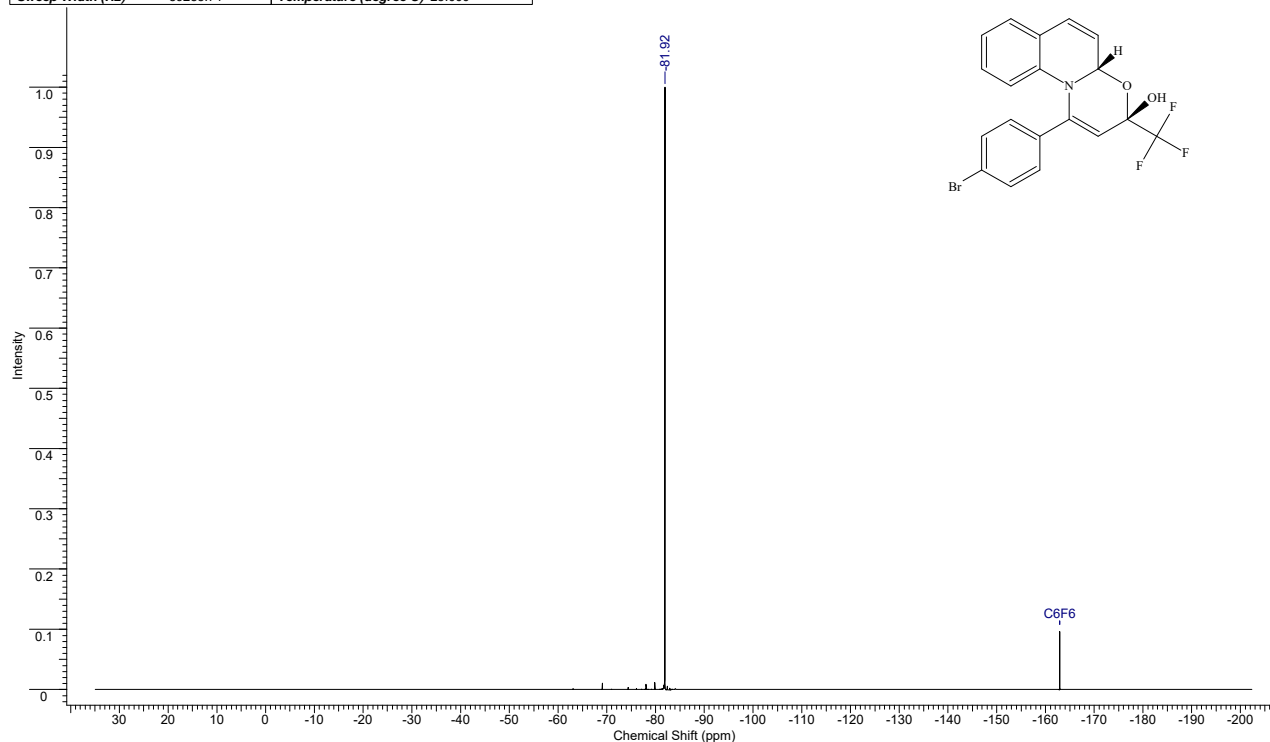

$^{19}F$  NMR spectrum of (3R\*,4aR\*)-3h (376.3 MHz,  $CD_3CN$ )

FW 425.3999 Formula C<sub>24</sub>H<sub>18</sub>F<sub>3</sub>NO<sub>3</sub>

| Acquisition Time (sec) | 2.5559                                       | Comment                | Imported from UXNMR. | Date           | 01 Jul 2017 13:50:12 |
|------------------------|----------------------------------------------|------------------------|----------------------|----------------|----------------------|
| File Name              | D:\BN\output\20170707.ep.e\BM-1119.H_001001r | Frequency (MHz)        | 400.13               | Nucleus        | <sup>1</sup> H       |
| Original Points Count  | 16384                                        | Points Count           | 65536                | Pulse Sequence | zg30                 |
| Sweep Width (Hz)       | 6410.26                                      | Temperature (degree C) | 27.000               | Solvent        | ACETONITRILE-D3      |

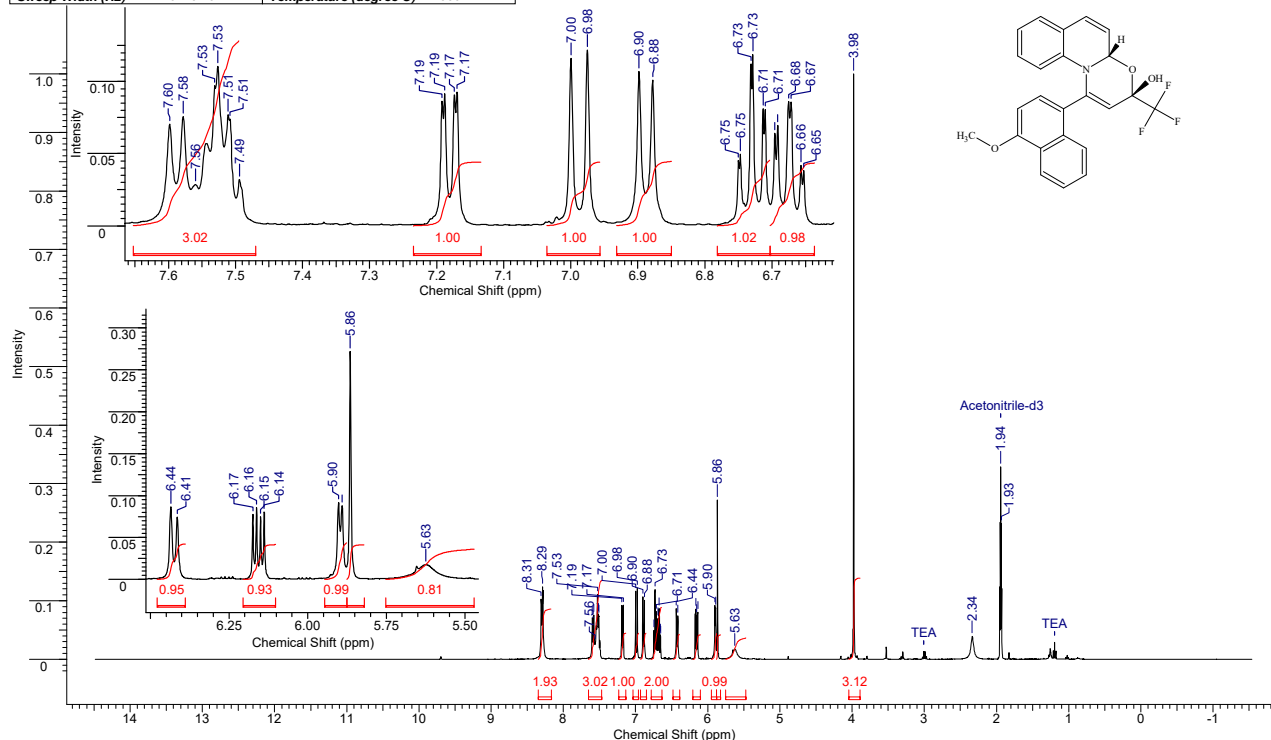<sup>1</sup>H NMR spectrum of (3*R*\*,4*aR*\*)-3i (400.1 MHz, CD<sub>3</sub>CN)

8 Sep 2017

FW 425.3999 Formula C<sub>24</sub>H<sub>18</sub>F<sub>3</sub>NO<sub>3</sub>

| Acquisition Time (sec) | 0.4999                                       | Comment                | Imported from UXNMR. | Date           | 01 Jul 2017 13:53:14 |
|------------------------|----------------------------------------------|------------------------|----------------------|----------------|----------------------|
| File Name              | D:\BN\output\20170707.ep.e\BM-1119.C_002001r | Frequency (MHz)        | 100.61               | Nucleus        | <sup>13</sup> C      |
| Number of Transients   | 82                                           | Original Points Count  | 12076                | Points Count   | 65536                |
| Solvent                | CHLOROFORM-D                                 | Sweep Width (Hz)       | 24154.59             | Pulse Sequence | zgpg30               |
|                        |                                              | Temperature (degree C) | 27.000               |                |                      |

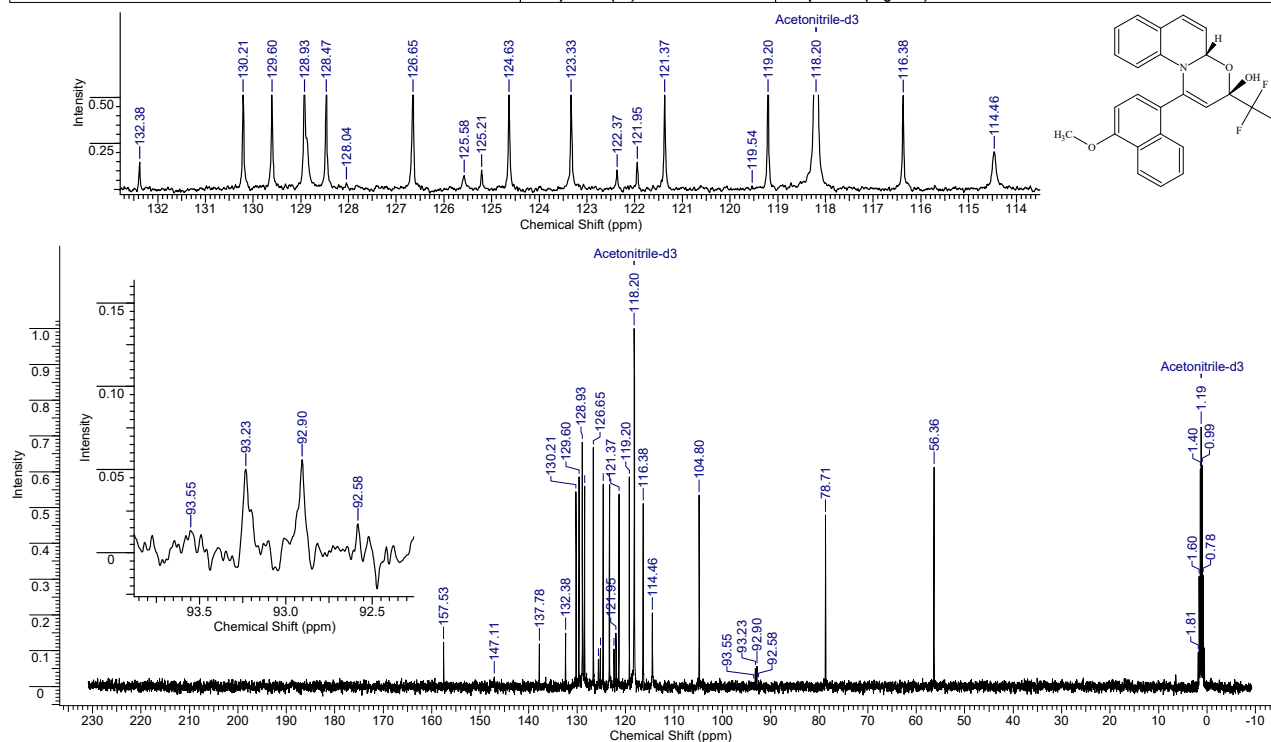<sup>13</sup>C NMR spectrum of (3*R*\*,4*aR*\*)-3i (100.6 MHz, CD<sub>3</sub>CN)



FW 425.3999 Formula C<sub>24</sub>H<sub>18</sub>F<sub>3</sub>NO<sub>2</sub>

|                        |          |                        |            |                       |                                                                               |
|------------------------|----------|------------------------|------------|-----------------------|-------------------------------------------------------------------------------|
| Acquisition Time (sec) | 1.5000   | Date                   | Jul 3 2017 | File Name             | D:\BN\Docs (BN)\vasili\SPEC BM F\2017.07.06_FIBM-1119_20170703_01\FLUORINE 01 |
| Frequency (MHz)        | 376.31   | Nucleus                | 19F        | Number of Transients  | 16                                                                            |
| Points Count           | 262144   | Pulse Sequence         | s2pul      | Solvent               | ACETONITRILE-D3                                                               |
| Sweep Width (Hz)       | 89285.71 | Temperature (degree C) | 25.000     | Original Points Count | 133929                                                                        |

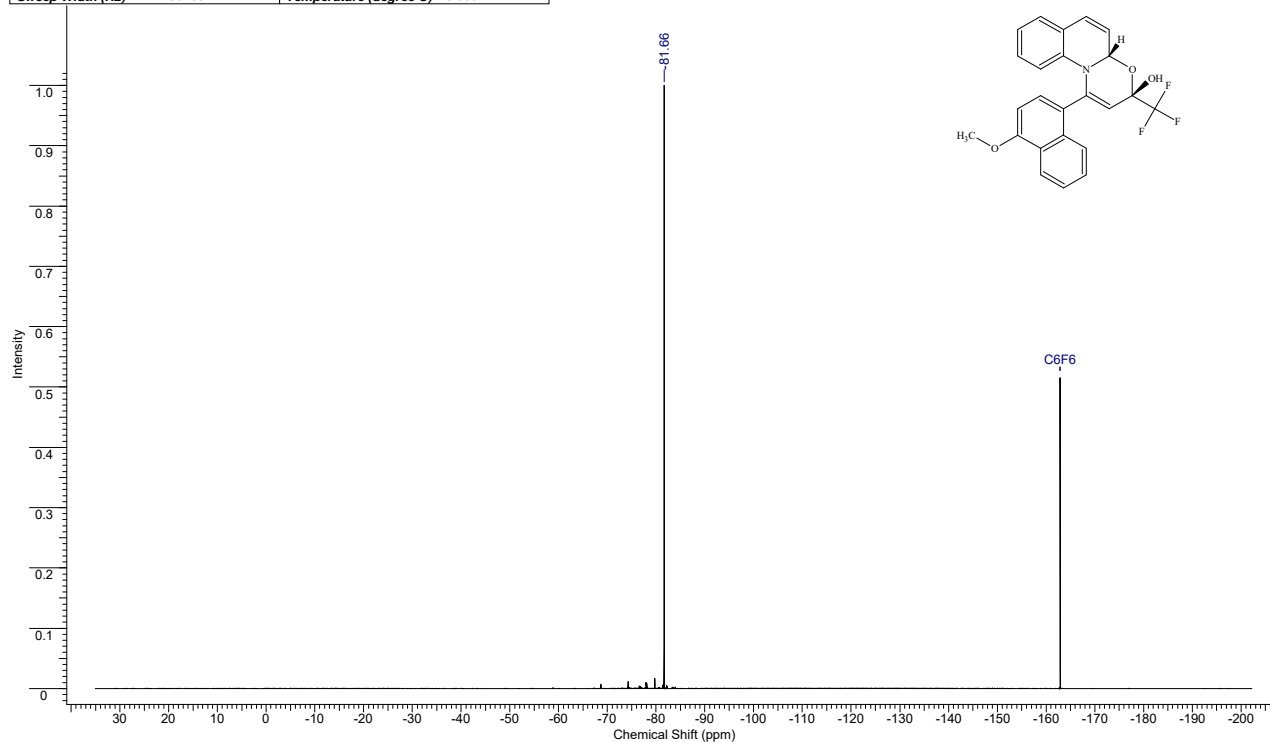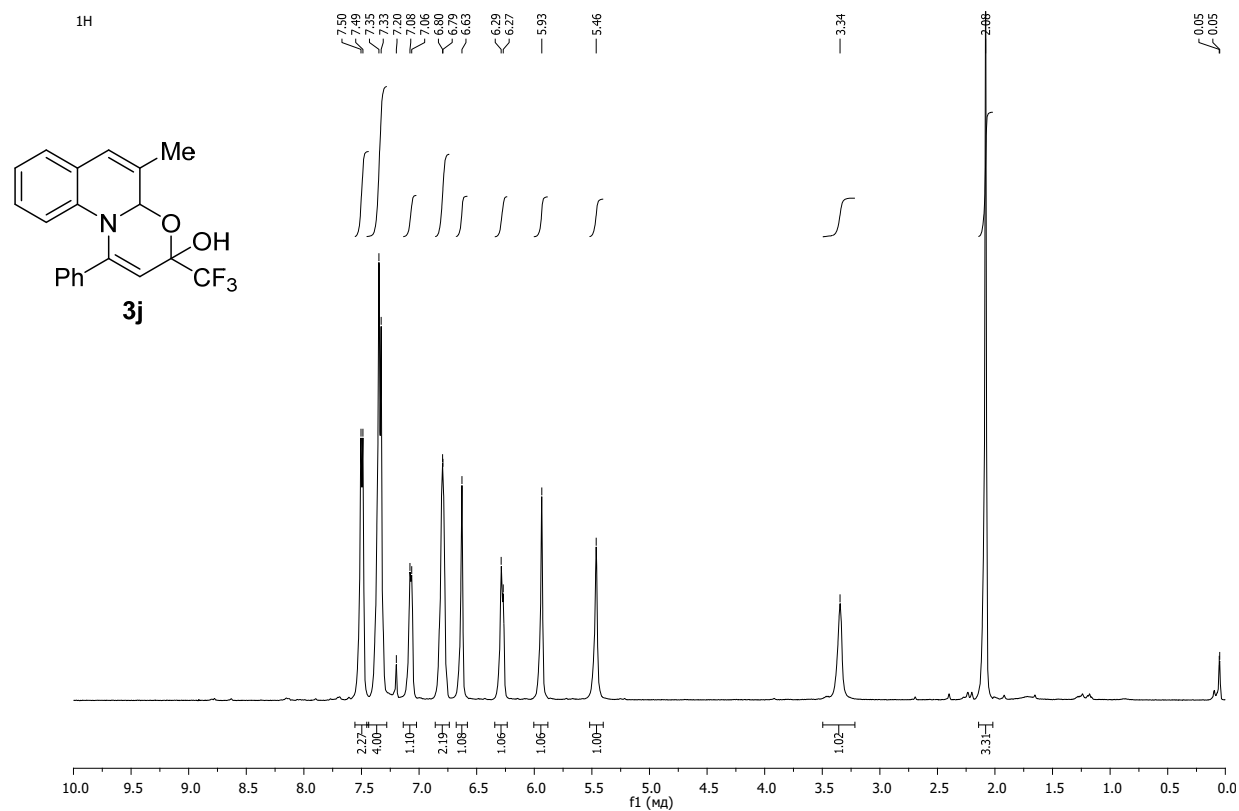

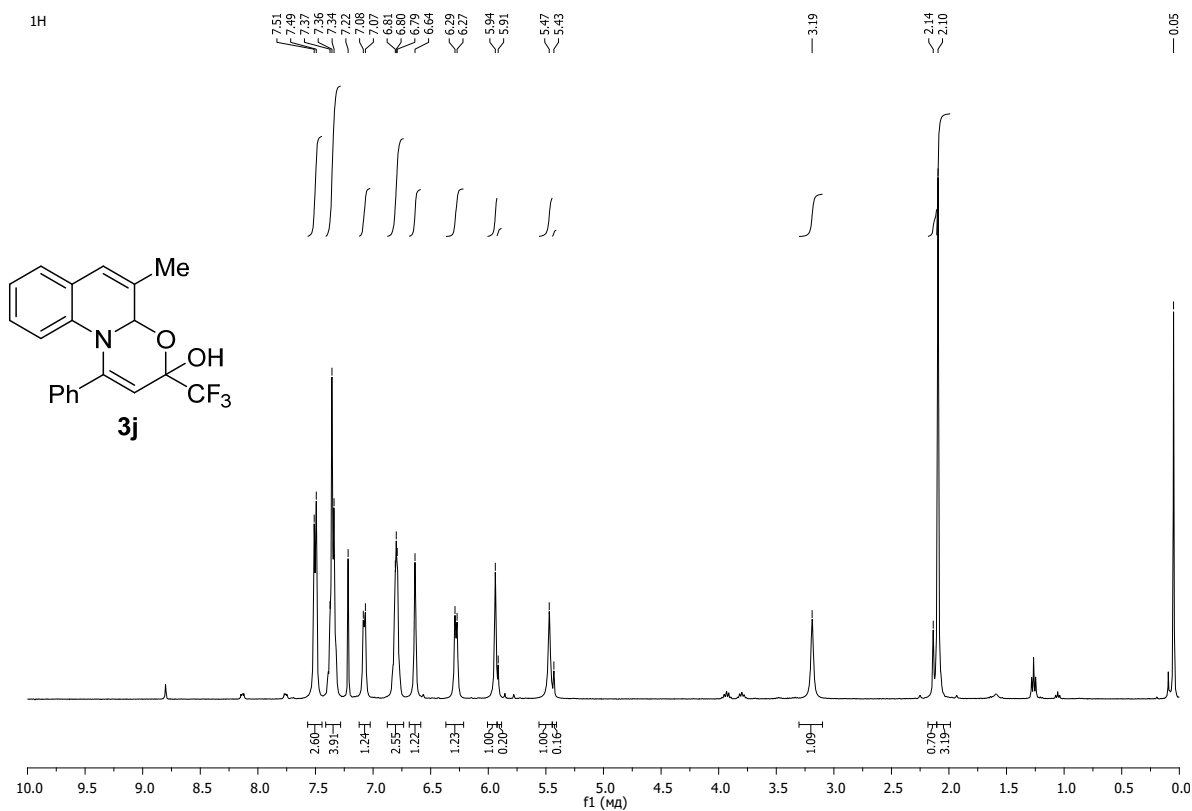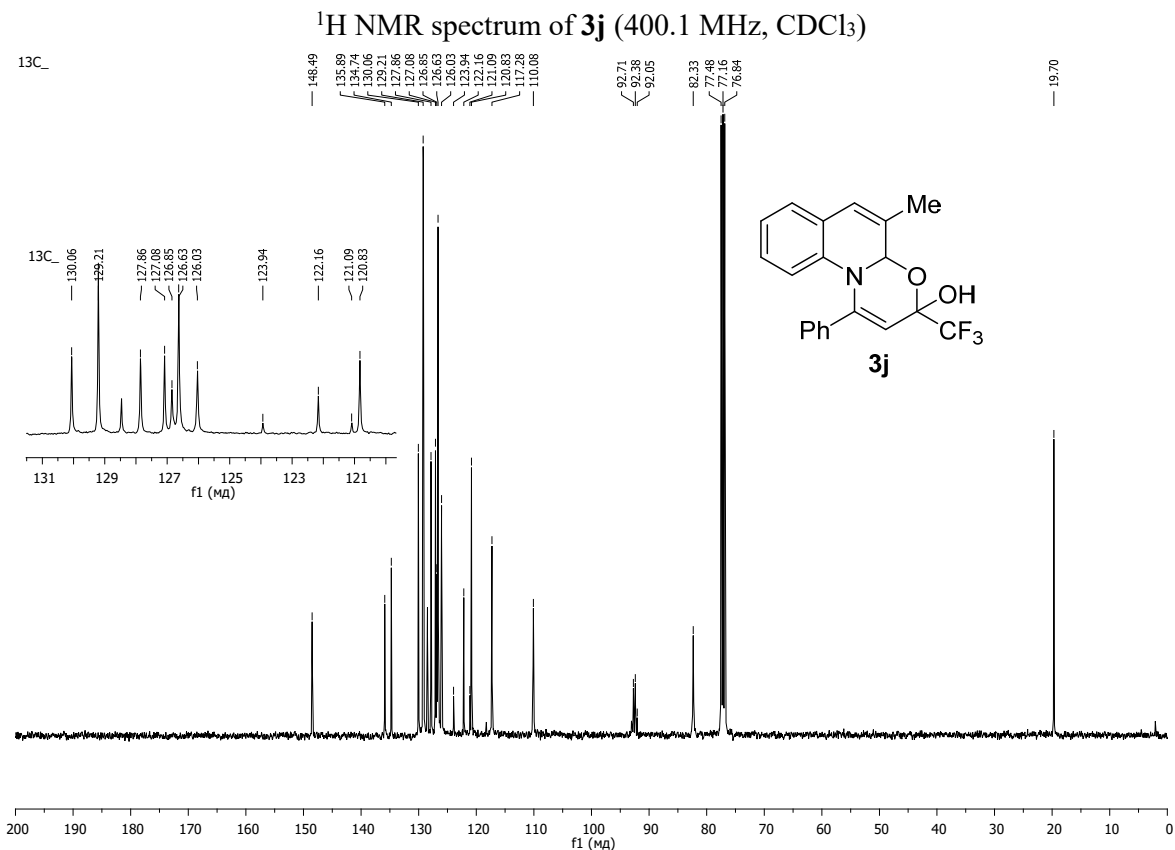

19F\_  
F19

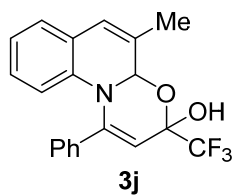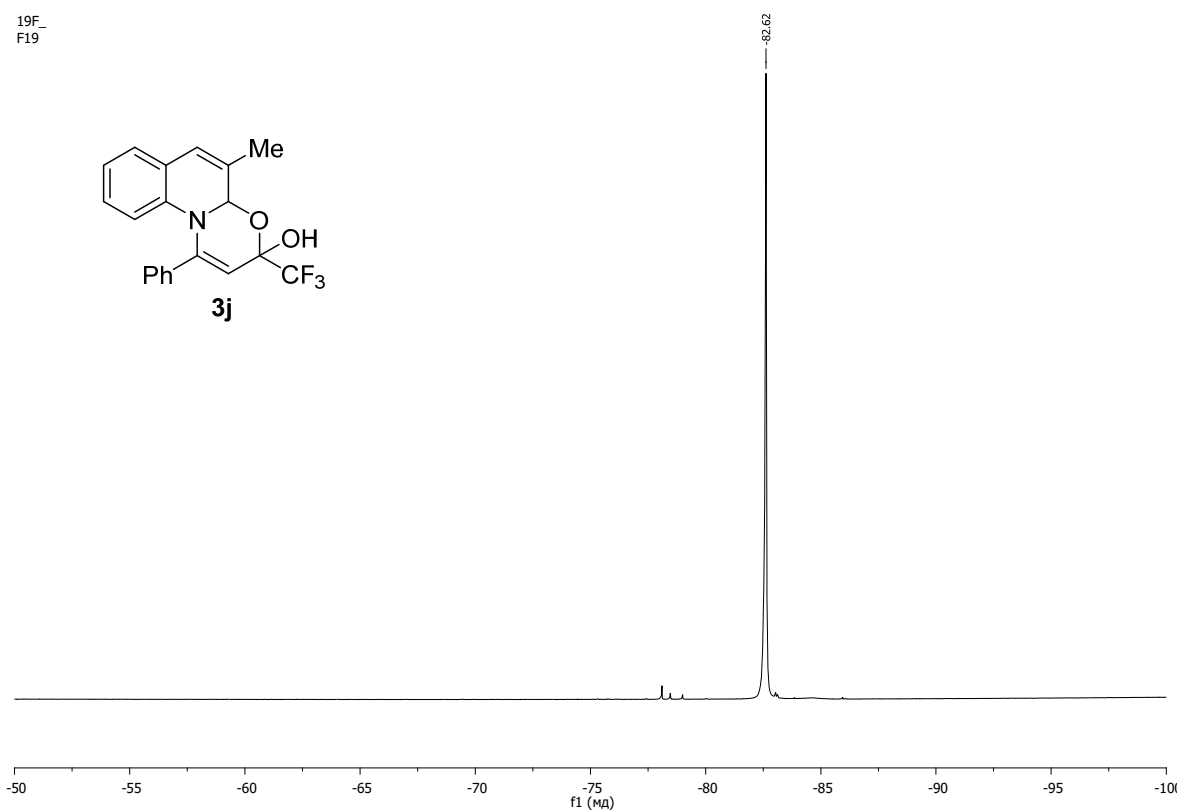

<sup>19</sup>F NMR spectrum of (3*R*\*,4*aR*\*)-**3j** (376.5 MHz, CDCl<sub>3</sub>)

19F\_  
F19

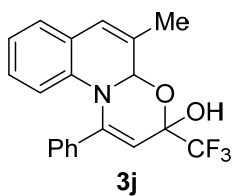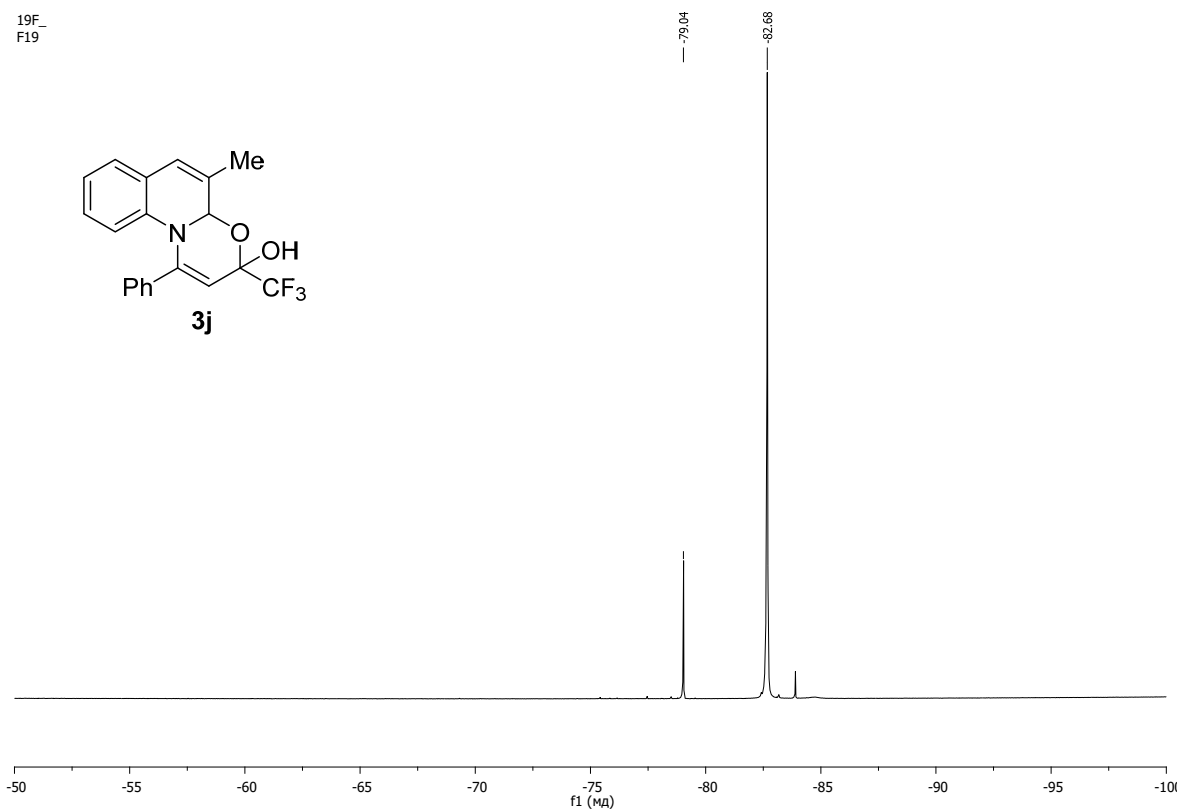

<sup>19</sup>F NMR spectrum of **3j** (376.5 MHz, CDCl<sub>3</sub>)

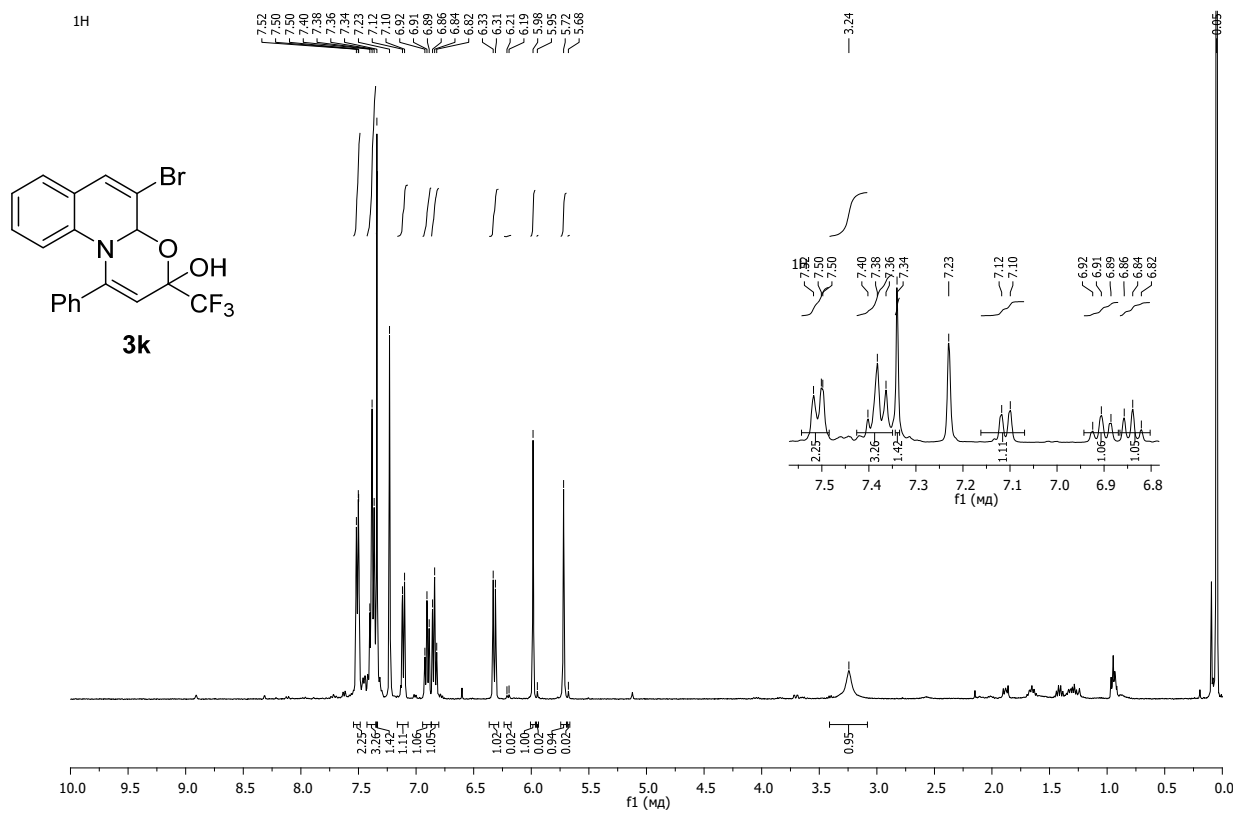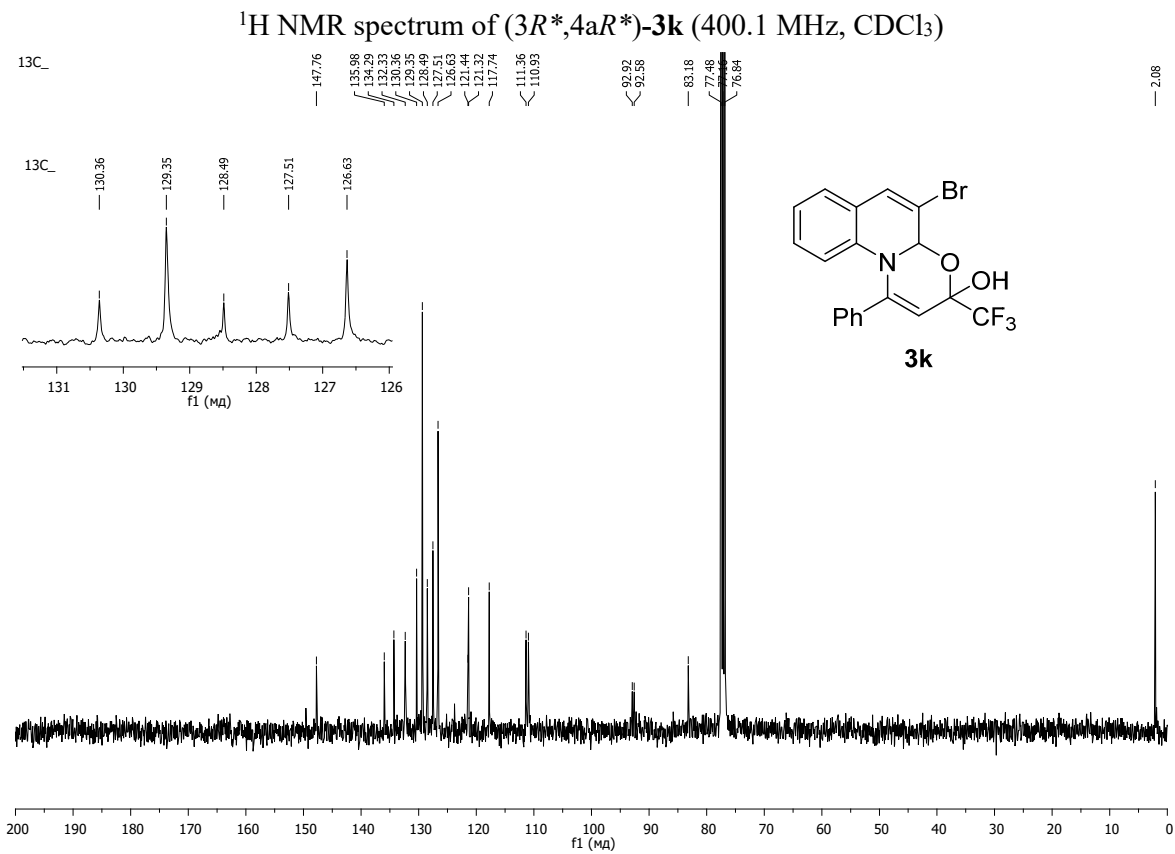

19F\_  
F19

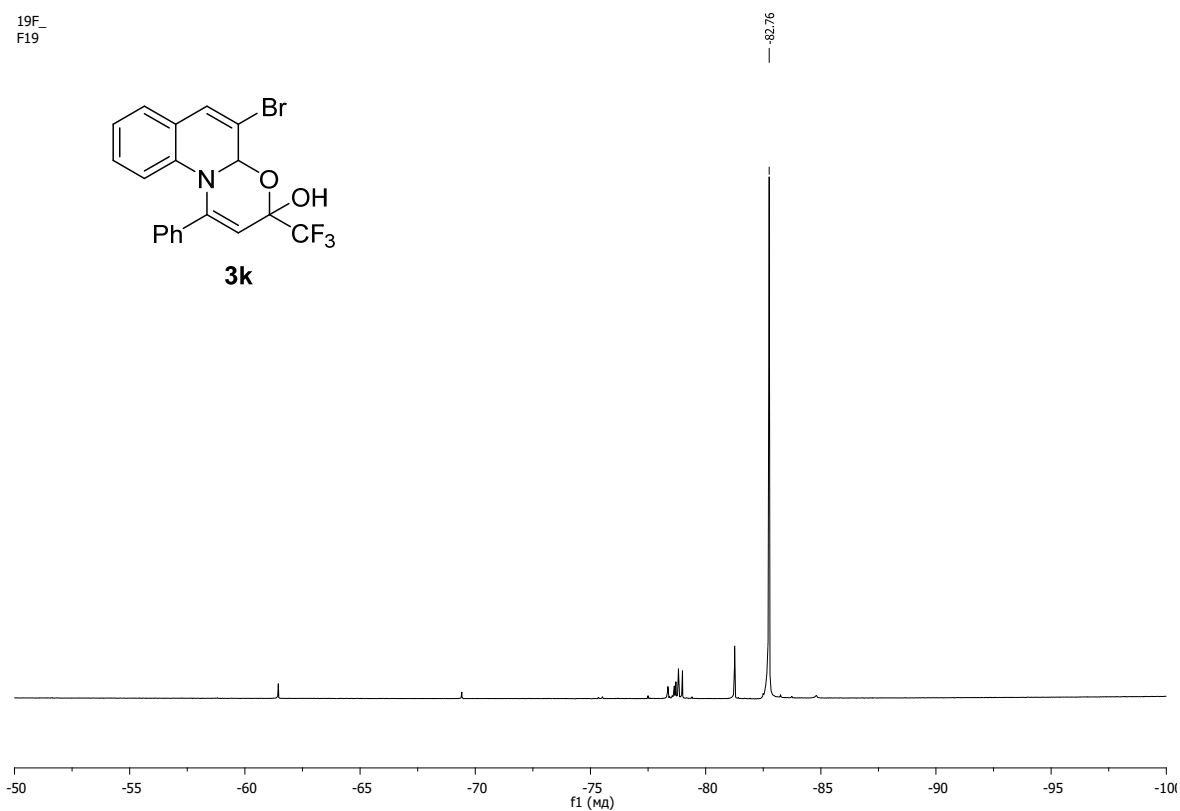

<sup>19</sup>F NMR spectrum of (3*R*\*,4*aR*\*)-**3k** (376.5 MHz, CDCl<sub>3</sub>)

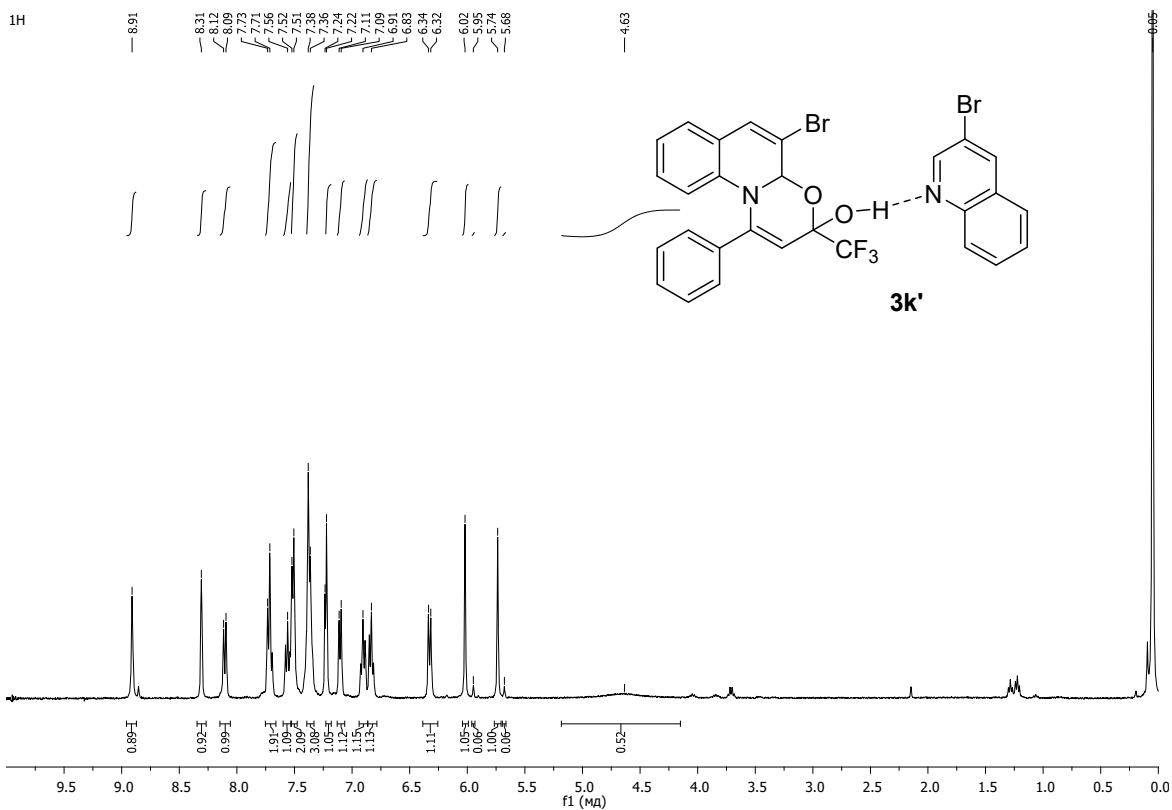

<sup>1</sup>H NMR spectrum of (3*R*\*,4*aR*\*)-**3k'** (400.1 MHz, CDCl<sub>3</sub>)

13C\_

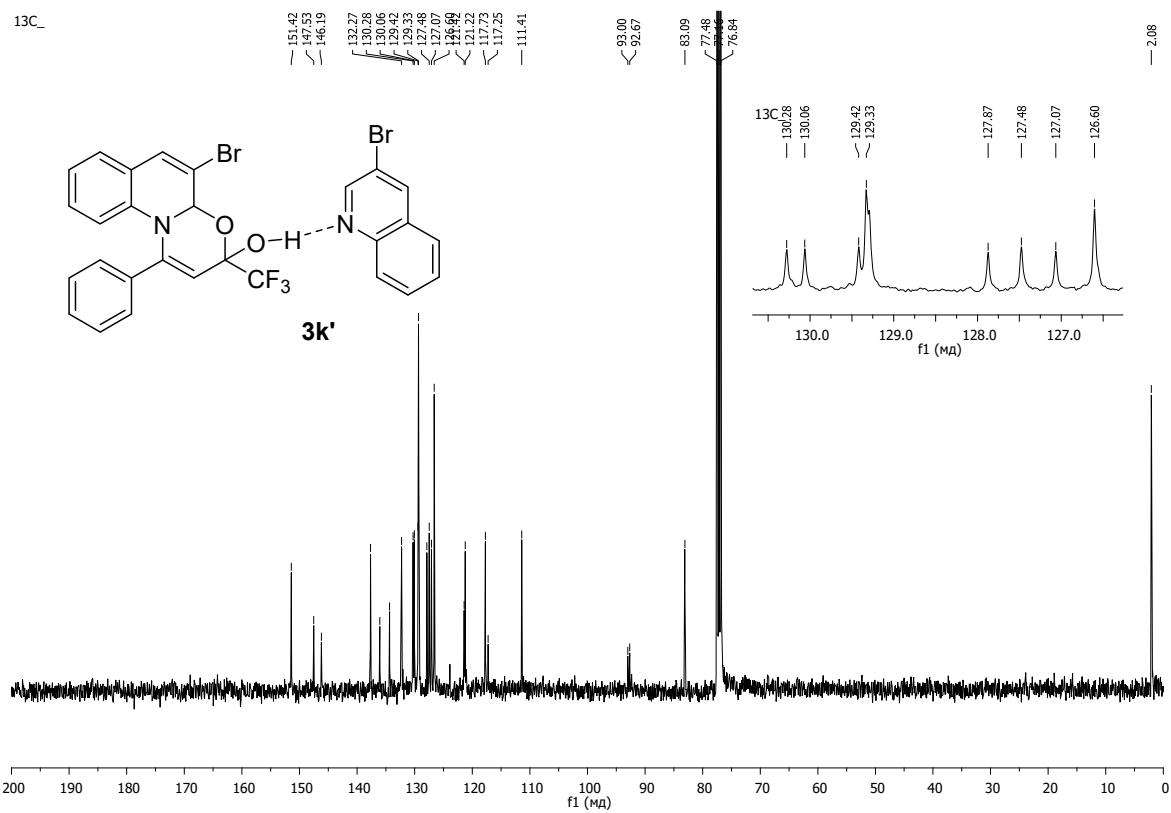

19F\_ F19

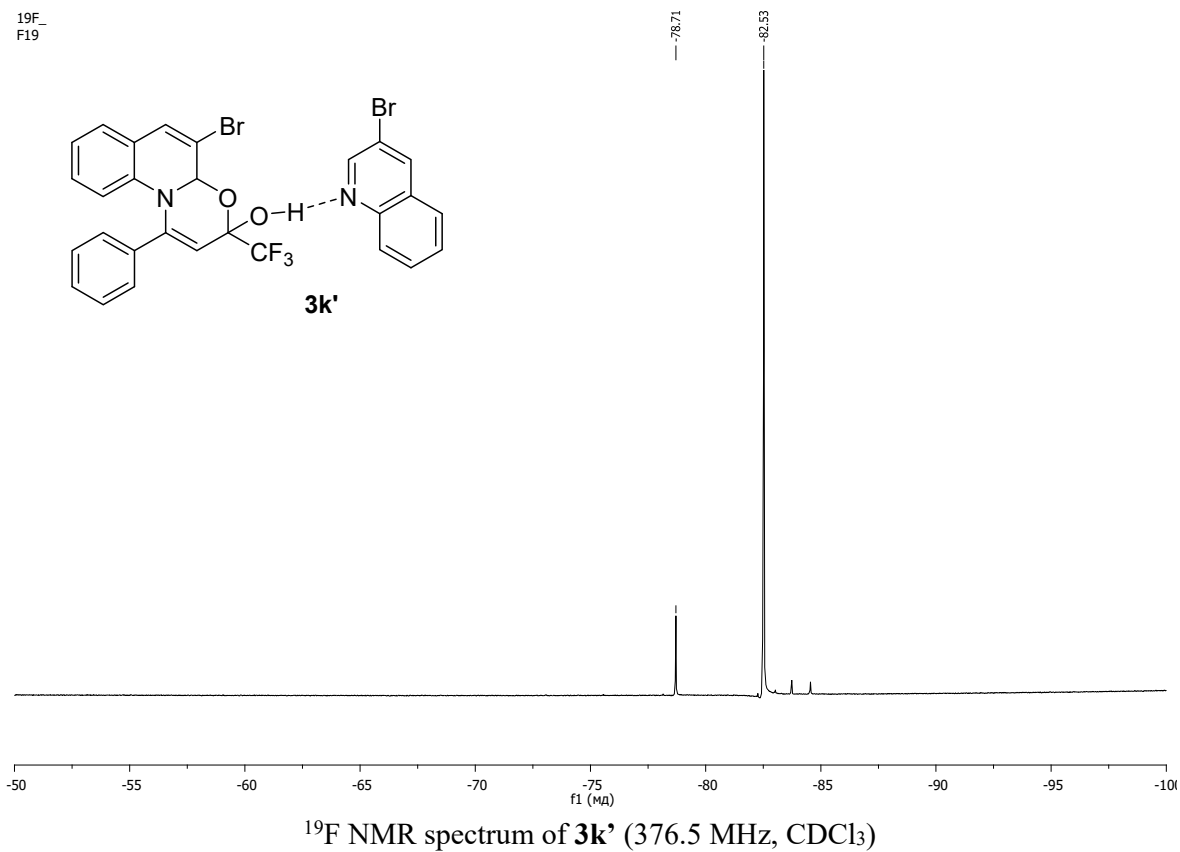

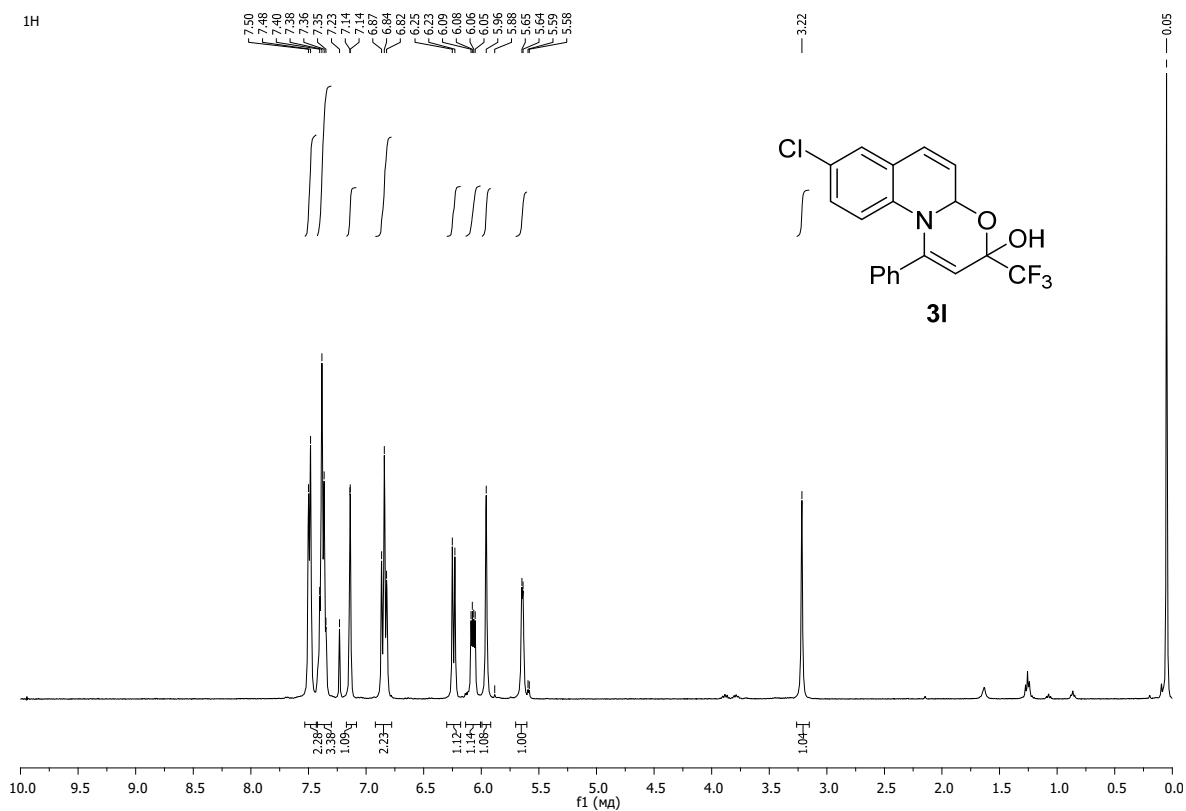

<sup>1</sup>H NMR spectrum of (3*R*\*,4*aR*\*)-**3I** in (400.1 MHz, CDCl<sub>3</sub>)

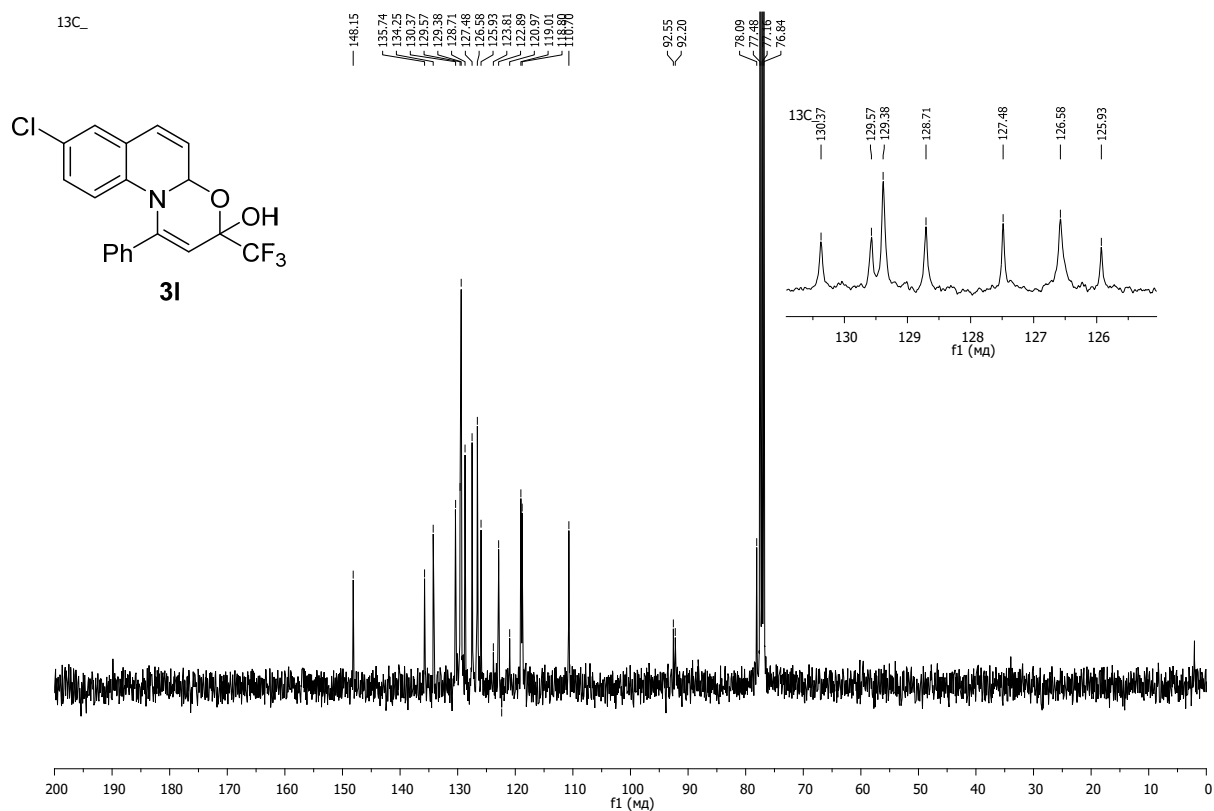

<sup>13</sup>C NMR spectrum of (3*R*\*,4*aR*\*)-**3I** (100.6 MHz, CDCl<sub>3</sub>)

19F  
F19

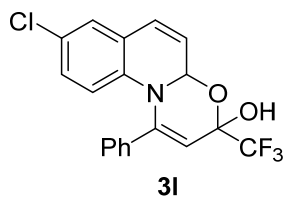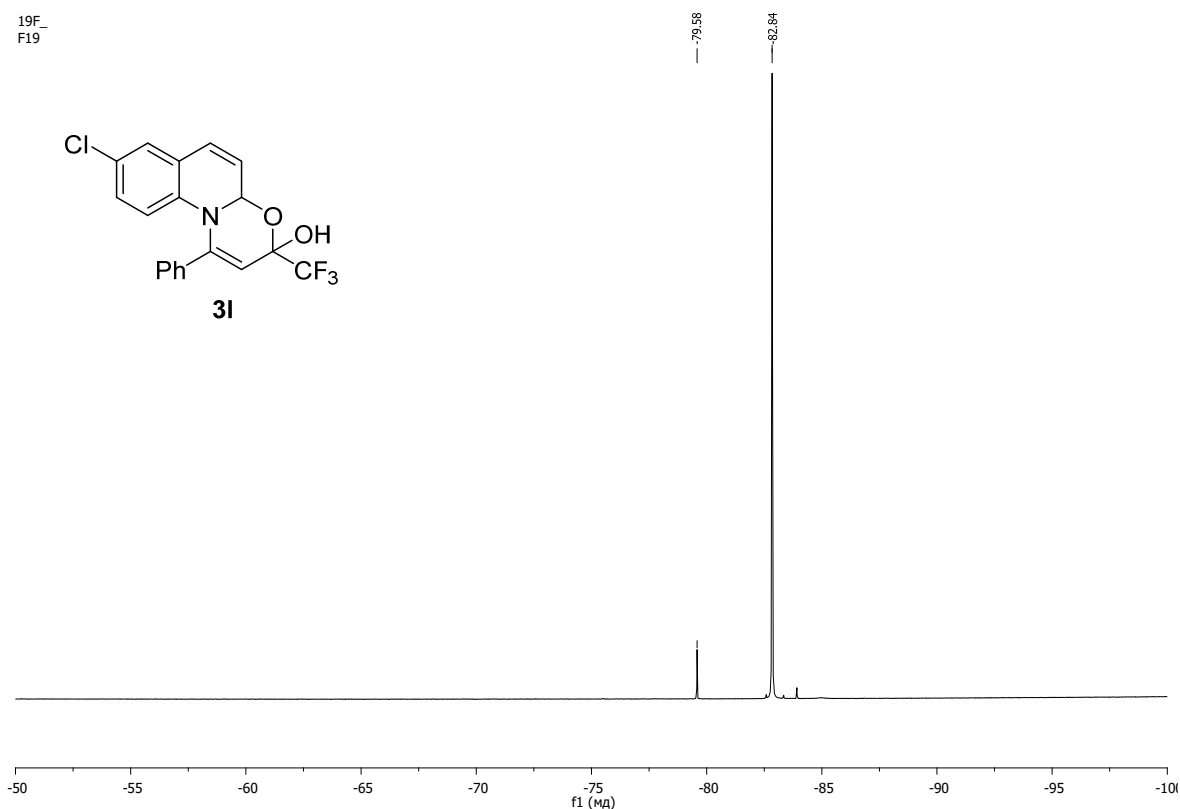

<sup>19</sup>F NMR spectrum of **3I** (376.5 MHz, CDCl<sub>3</sub>)

8 Sep 2017

|                        |                                                 |                        |                                                                                |
|------------------------|-------------------------------------------------|------------------------|--------------------------------------------------------------------------------|
| FW                     | 414.2047                                        | Formula                | C <sub>19</sub> H <sub>12</sub> Cl <sub>2</sub> F <sub>3</sub> NO <sub>2</sub> |
| Acquisition Time (sec) | 2.5559                                          | Comment                | Imported from UXNMR.                                                           |
| File Name              | D:\BN\output\2017\07.ep.eu\BM-1080-1a.H_001001r | Frequency (MHz)        | 400.13                                                                         |
| Number of Transients   | 4                                               | Original Points Count  | 16384                                                                          |
| Solvent                | ACETONITRILE-D3                                 | Points Count           | 65536                                                                          |
|                        |                                                 | Sweep Width (Hz)       | 6410.26                                                                        |
|                        |                                                 | Temperature (degree C) | 27.000                                                                         |
|                        |                                                 | Date                   | 04 Jul 2017 14:11:22                                                           |
|                        |                                                 | Nucleus                | 1H                                                                             |
|                        |                                                 | Pulse Sequence         | zg30                                                                           |

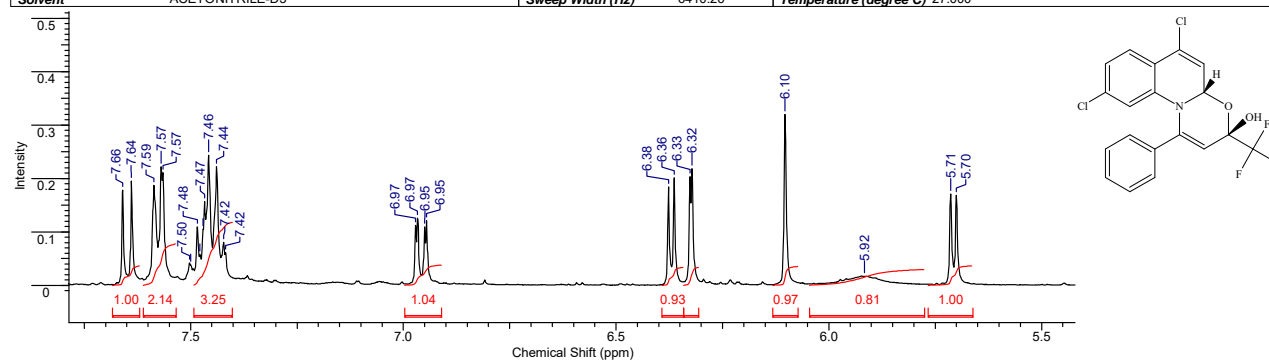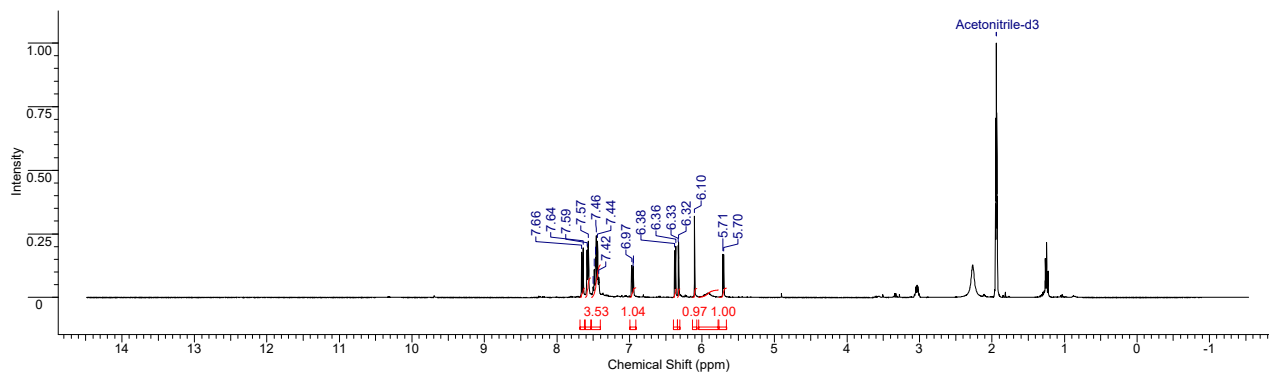

<sup>1</sup>H NMR spectrum of (3*R*\*,4*aR*\*)-**3m** (400.1 MHz, CD<sub>3</sub>CN)



|                        |                                                  |                      |                                                                                |
|------------------------|--------------------------------------------------|----------------------|--------------------------------------------------------------------------------|
| FW                     | 414.2047                                         | Formula              | C <sub>18</sub> H <sub>12</sub> Cl <sub>2</sub> F <sub>3</sub> NO <sub>2</sub> |
| Acquisition Time (sec) | 0.4999                                           | Comment              | Imported from UXNMR.                                                           |
| File Name              | D:\BN\output\20170707.ep.eu\BM-1080-1a.C_002001r | Frequency (MHz)      | 100.61                                                                         |
| Original Points Count  | 12076                                            | Points Count         | 65536                                                                          |
| Temperature (degree C) | 27.000                                           | Pulse Sequence       | zpgg30                                                                         |
|                        |                                                  | Solvent              | DMSO-D6                                                                        |
|                        |                                                  | Nucleus              | 13C                                                                            |
|                        |                                                  | Number of Transients | 401                                                                            |
|                        |                                                  | Sweep Width (Hz)     | 24154.59                                                                       |

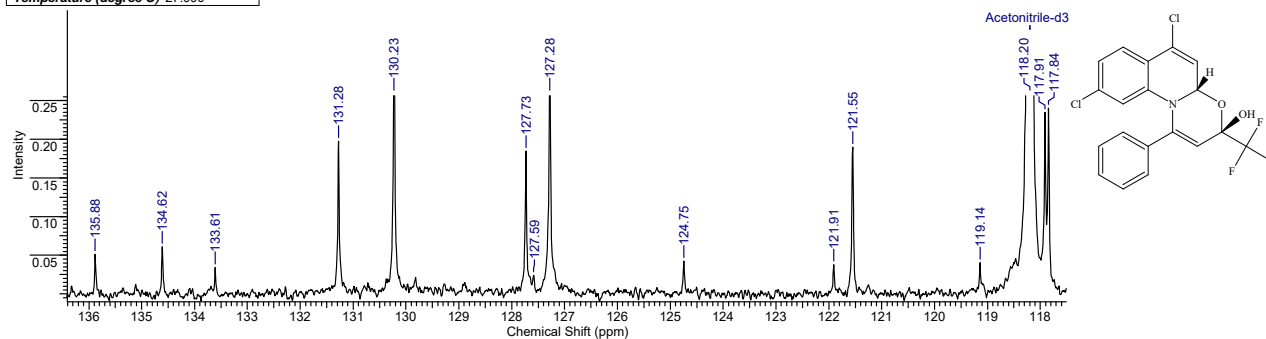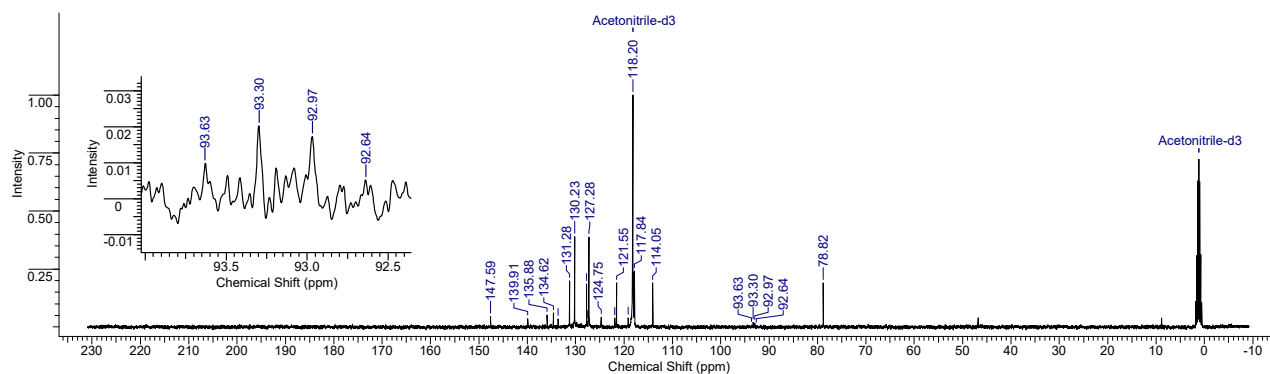

<sup>13</sup>C NMR spectrum of (3R\*,4aR\*)-3m (100.6 MHz, CD<sub>3</sub>CN)

|                        |          |                        |                                                                                 |
|------------------------|----------|------------------------|---------------------------------------------------------------------------------|
| FW                     | 414.2047 | Formula                | C <sub>18</sub> H <sub>12</sub> Cl <sub>2</sub> F <sub>3</sub> NO <sub>2</sub>  |
| Acquisition Time (sec) | 1.5000   | Date                   | Jul 3 2017                                                                      |
| Frequency (MHz)        | 376.31   | Nucleus                | 19F                                                                             |
| Points Count           | 262144   | Pulse Sequence         | s2pul                                                                           |
| Sweep Width (Hz)       | 89285.71 | Temperature (degree C) | 25.000                                                                          |
|                        |          | File Name              | D:\BN\Docs (BN)\vasily\SPEC_BM_F\2017.07.06_F\BM-1080-1a_20170703_01FLUORINE_01 |
|                        |          | Number of Transients   | 16                                                                              |
|                        |          | Original Points Count  | 133929                                                                          |
|                        |          | Solvent                | ACETONITRILE-D3                                                                 |

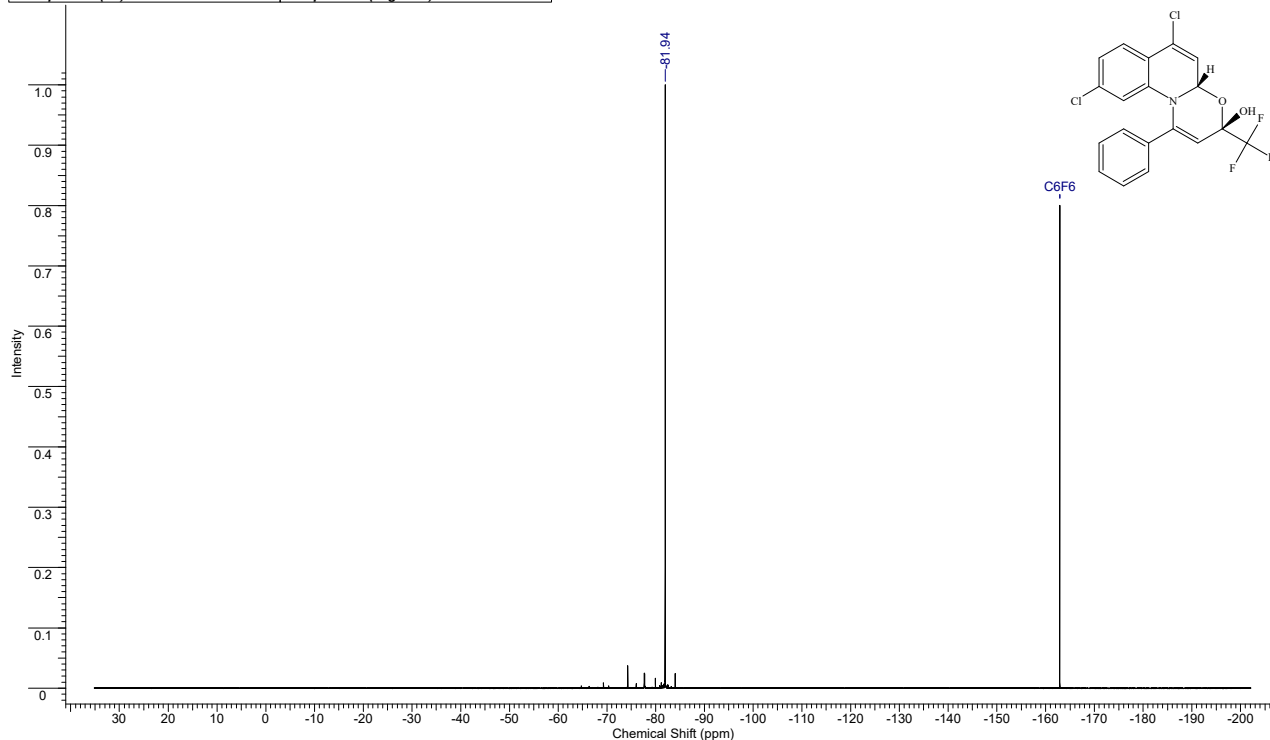

<sup>19</sup>F NMR spectrum of (3R\*,4aR\*)-3m (376.3 MHz, CD<sub>3</sub>CN)

|    |          |         |                                                                  |
|----|----------|---------|------------------------------------------------------------------|
| FW | 424.2113 | Formula | C <sub>19</sub> H <sub>12</sub> BrF <sub>3</sub> NO <sub>2</sub> |
|----|----------|---------|------------------------------------------------------------------|

| Acquisition Time (sec) | 2.5559                                        | Comment                | Imported from UXNMR. | Date           | 07 Jul 2017 15:29:14 |                      |                 |
|------------------------|-----------------------------------------------|------------------------|----------------------|----------------|----------------------|----------------------|-----------------|
| File Name              | D:\BN\output\20170707.epi\BM-1087-a.H_001001r | Frequency (MHz)        | 400.13               | Nucleus        | <sup>1</sup> H       | Number of Transients | 6               |
| Original Points Count  | 16384                                         | Points Count           | 65536                | Pulse Sequence | zg30                 | Solvent              | ACETONITRILE-D3 |
| Sweep Width (Hz)       | 6410.26                                       | Temperature (degree C) | 27.000               |                |                      |                      |                 |

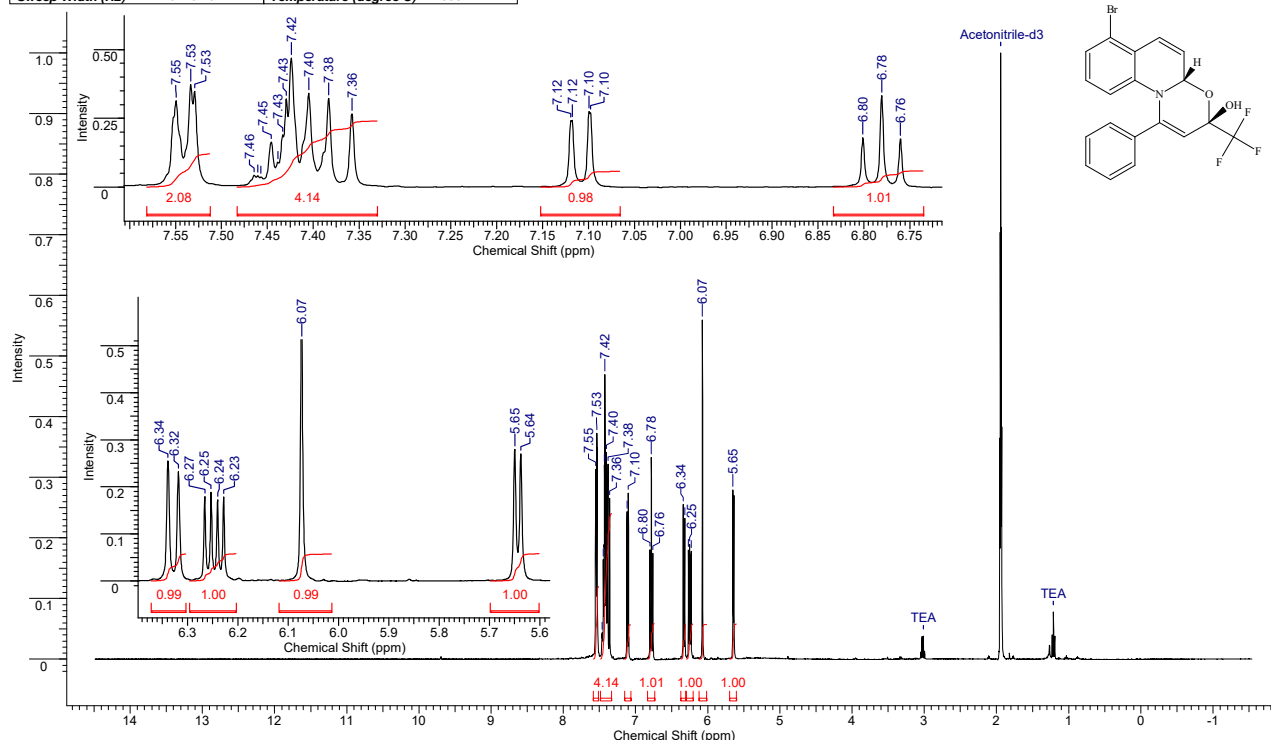

|    |          |         |                                                                  |
|----|----------|---------|------------------------------------------------------------------|
| FW | 424.2113 | Formula | C <sub>19</sub> H <sub>12</sub> BrF <sub>3</sub> NO <sub>2</sub> |
|----|----------|---------|------------------------------------------------------------------|

| Acquisition Time (sec) | 0.4999                                    | Comment               | Imported from UXNMR. | Date                   | 30 Jun 2017 15:54:04 |                |        |
|------------------------|-------------------------------------------|-----------------------|----------------------|------------------------|----------------------|----------------|--------|
| File Name              | D:\BN\output\20170606.p\BM-1087.C_002001r | Frequency (MHz)       | 100.61               | Nucleus                | <sup>13</sup> C      |                |        |
| Number of Transients   | 35                                        | Original Points Count | 12076                | Points Count           | 65536                | Pulse Sequence | zgpg30 |
| Solvent                | CHLOROFORM-D                              | Sweep Width (Hz)      | 24154.59             | Temperature (degree C) | 27.000               |                |        |

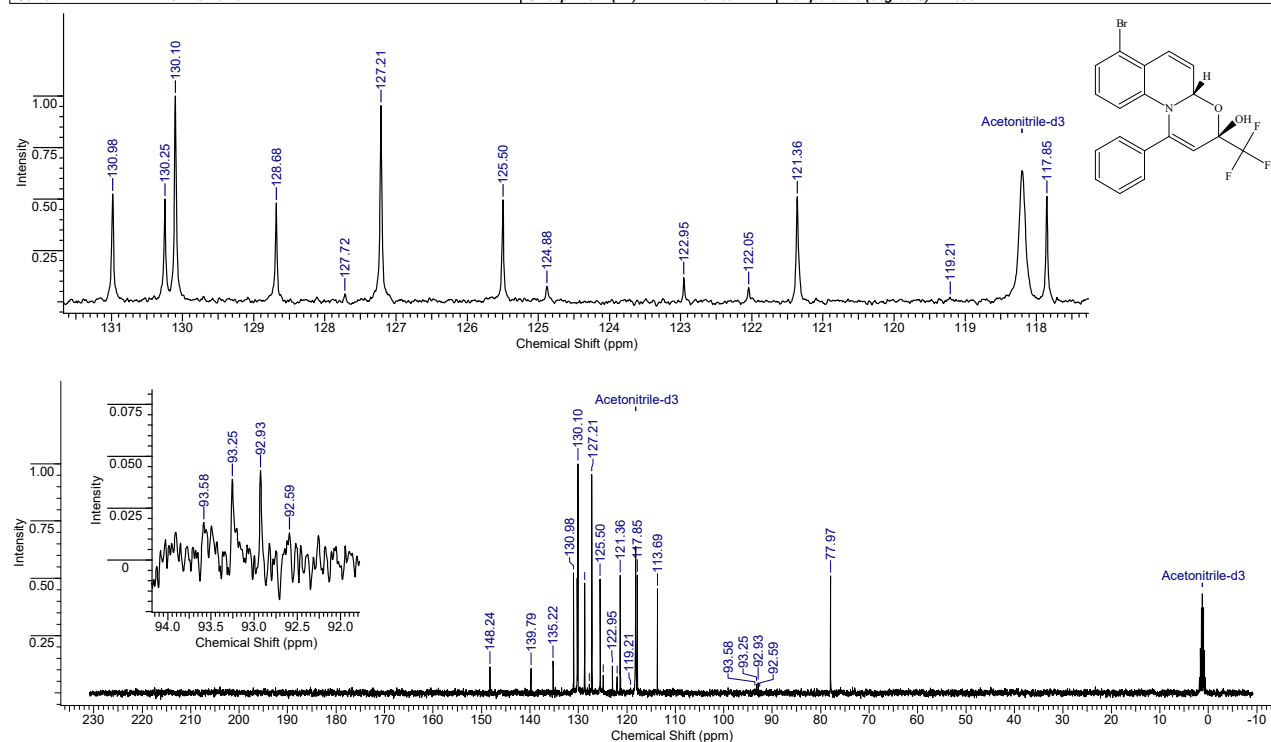

|    |          |         |                                                                                |
|----|----------|---------|--------------------------------------------------------------------------------|
| FW | 424.2113 | Formula | C <sub>19</sub> H <sub>13</sub> BrF <sub>3</sub> N <sub>2</sub> O <sub>2</sub> |
|----|----------|---------|--------------------------------------------------------------------------------|

|                        |          |                        |             |                       |                                                                             |
|------------------------|----------|------------------------|-------------|-----------------------|-----------------------------------------------------------------------------|
| Acquisition Time (sec) | 1.0000   | Date                   | Jun 30 2017 | File Name             | D:\BN\Docs (BN)\vasili\SPEC BM F2017.07.06 FIBM-1087_20170630_01FLUORINE 01 |
| Frequency (MHz)        | 376.31   | Nucleus                | 19F         | Number of Transients  | 16                                                                          |
| Points Count           | 131072   | Pulse Sequence         | s2pul       | Original Points Count | 89286                                                                       |
| Sweep Width (Hz)       | 89285.71 | Temperature (degree C) | 25.000      | Solvent               | ACETONITRILE-D3                                                             |

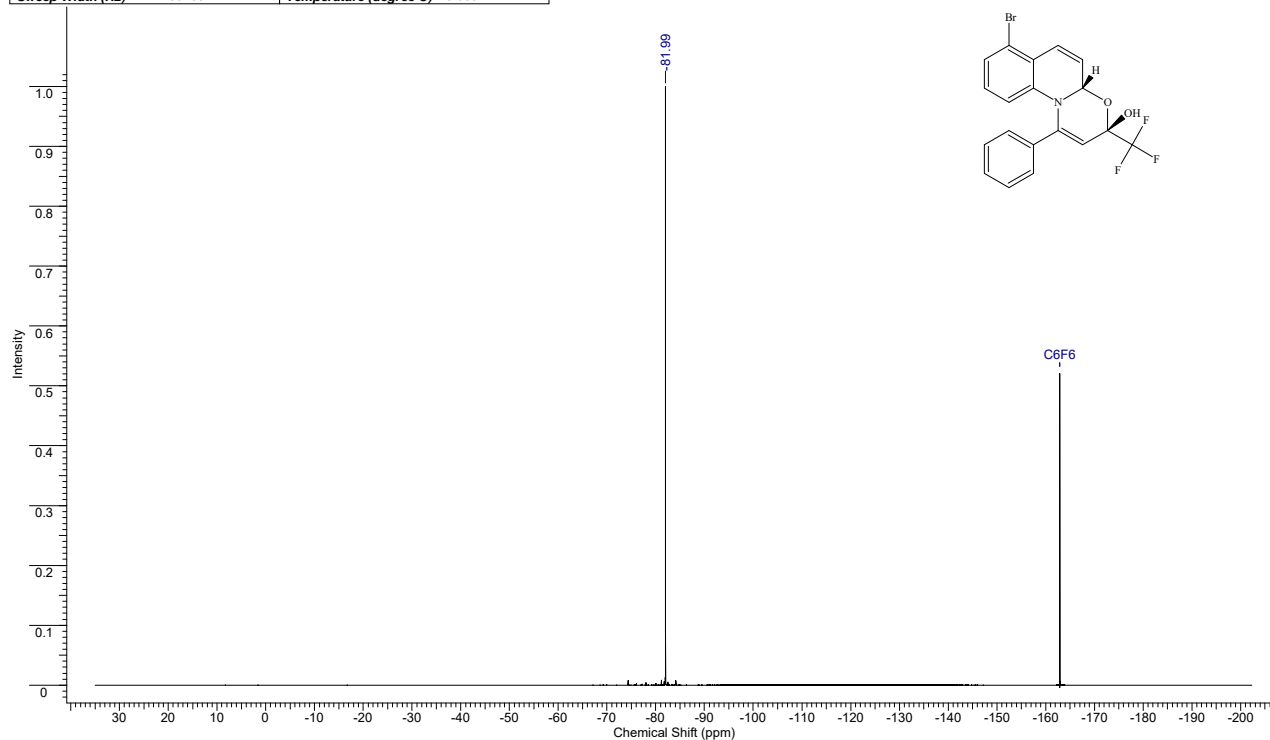

|    |          |         |                                                                              |
|----|----------|---------|------------------------------------------------------------------------------|
| FW | 370.3247 | Formula | C <sub>20</sub> H <sub>13</sub> F <sub>3</sub> N <sub>2</sub> O <sub>2</sub> |
|----|----------|---------|------------------------------------------------------------------------------|

|                        |                                                |                        |                      |                |                      |
|------------------------|------------------------------------------------|------------------------|----------------------|----------------|----------------------|
| Acquisition Time (sec) | 2.5559                                         | Comment                | Imported from UXNMR. | Date           | 30 Jun 2017 15:45:52 |
| File Name              | D:\BN\output\2017.06.ep i 0\IBM-1086.H 001001r | Frequency (MHz)        | 400.13               | Nucleus        | 1H                   |
| Original Points Count  | 16384                                          | Points Count           | 65536                | Pulse Sequence | zg30                 |
| Sweep Width (Hz)       | 6410.26                                        | Temperature (degree C) | 27.000               | Solvent        | ACETONITRILE-D3      |

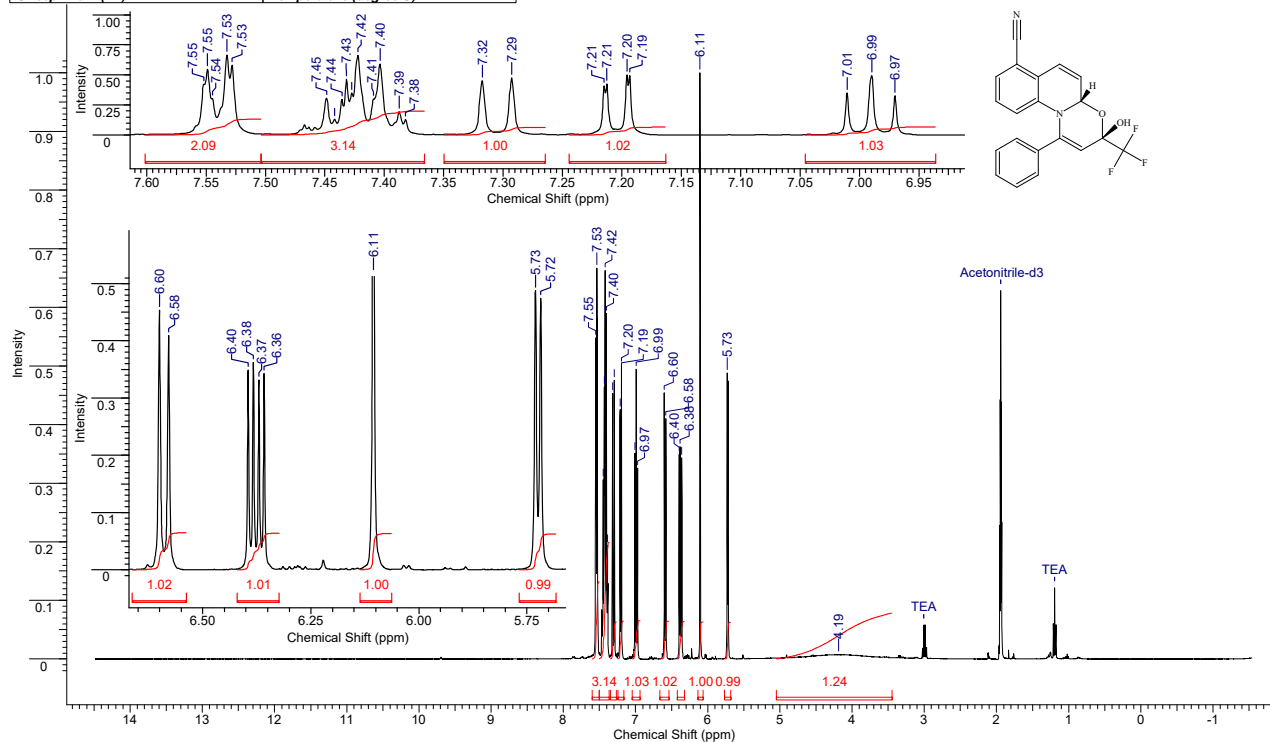

|    |          |         |                                                                              |
|----|----------|---------|------------------------------------------------------------------------------|
| FW | 370.3247 | Formula | C <sub>20</sub> H <sub>13</sub> F <sub>3</sub> N <sub>2</sub> O <sub>2</sub> |
|----|----------|---------|------------------------------------------------------------------------------|

|                        |                                              |                       |                      |                        |                      |
|------------------------|----------------------------------------------|-----------------------|----------------------|------------------------|----------------------|
| Acquisition Time (sec) | 0.4999                                       | Comment               | Imported from UXNMR. | Date                   | 30 Jun 2017 15:50:00 |
| File Name              | D:\BN\output\201706.ep i \iBM-1086.C_002001r | Frequency (MHz)       | 100.61               | Nucleus                | 13C                  |
| Number of Transients   | 64                                           | Original Points Count | 12076                | Points Count           | 65536                |
| Solvent                | CHLOROFORM-D                                 | Sweep Width (Hz)      | 24154.59             | Pulse Sequence         | zpgg30               |
|                        |                                              |                       |                      | Temperature (degree C) | 27.000               |

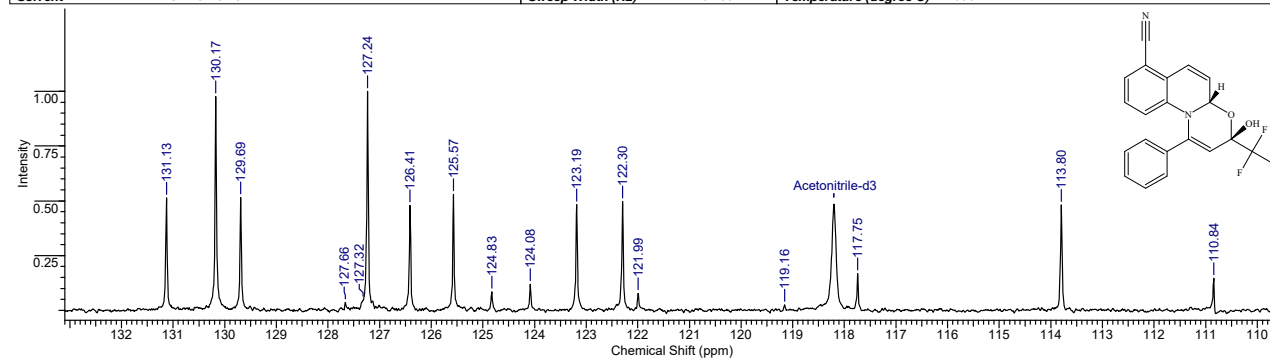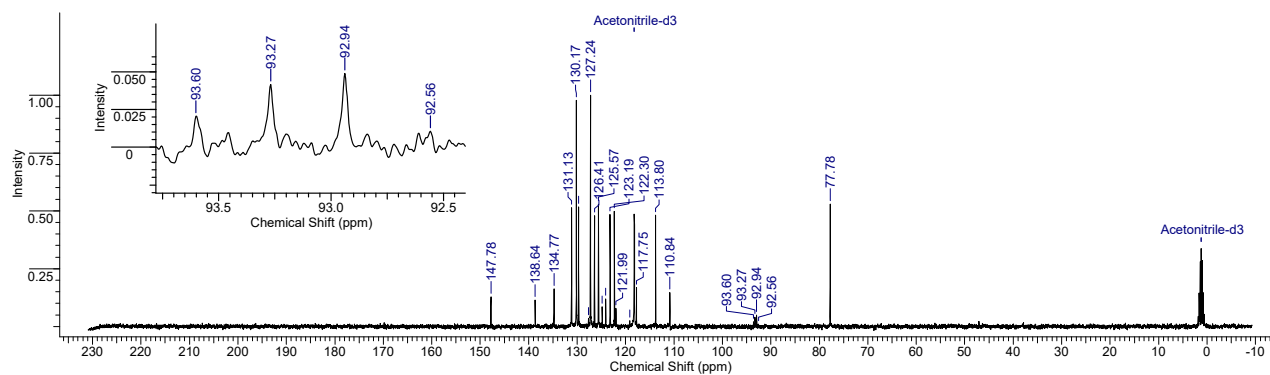

<sup>13</sup>C NMR spectrum of (3R\*,4aR\*)-3o (100.6 MHz, CD<sub>3</sub>CN)

|    |          |         |                                                                              |
|----|----------|---------|------------------------------------------------------------------------------|
| FW | 370.3247 | Formula | C <sub>20</sub> H <sub>13</sub> F <sub>3</sub> N <sub>2</sub> O <sub>2</sub> |
|----|----------|---------|------------------------------------------------------------------------------|

|                        |          |                        |             |                       |                                                                                |
|------------------------|----------|------------------------|-------------|-----------------------|--------------------------------------------------------------------------------|
| Acquisition Time (sec) | 1.0000   | Date                   | Jun 30 2017 | File Name             | D:\BN\Docs (BN)\vasily\SPEC_BM_F\2017.07.06_F\iBM-1086_20170630_01\FLUORINE_01 |
| Frequency (MHz)        | 376.31   | Nucleus                | 19F         | Number of Transients  | 16                                                                             |
| Points Count           | 131072   | Pulse Sequence         | s2pul       | Original Points Count | 89286                                                                          |
| Sweep Width (Hz)       | 89285.71 | Temperature (degree C) | 25.000      | Solvent               | ACETONITRILE-D3                                                                |

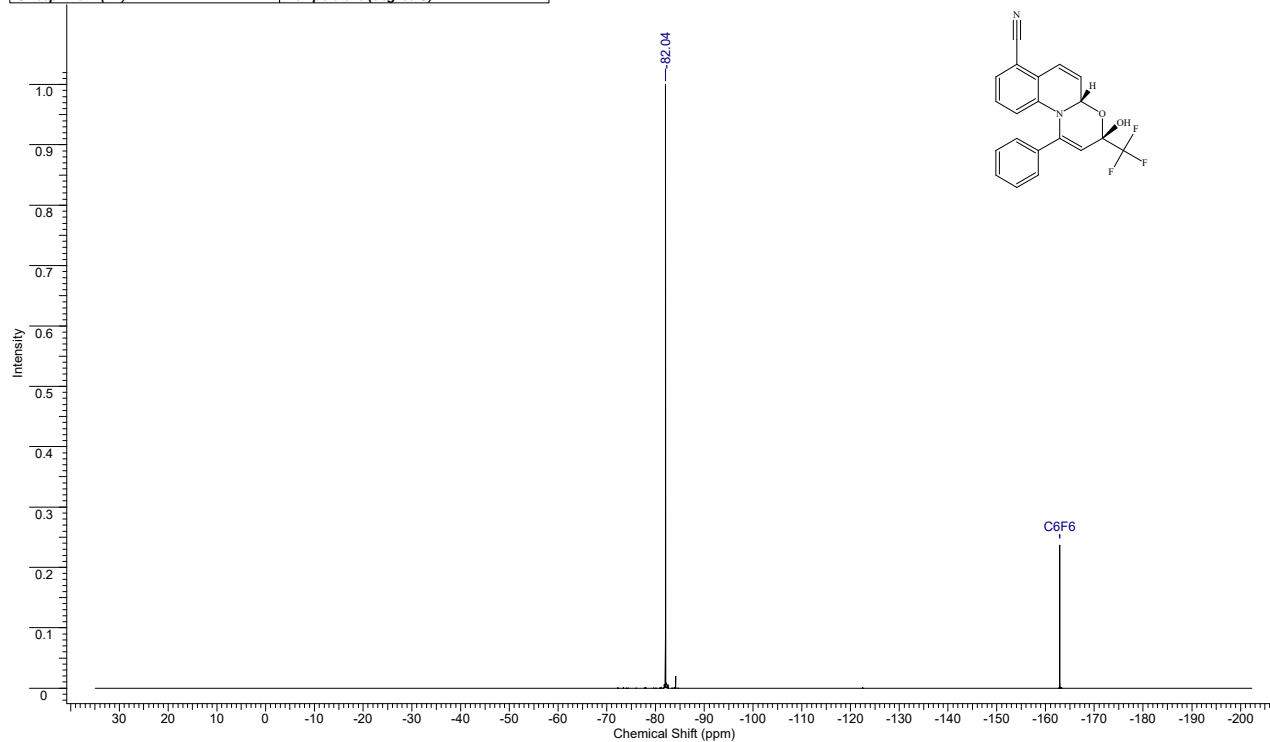

<sup>19</sup>F NMR spectrum of (3R\*,4aR\*)-3o (376.3 MHz, CD<sub>3</sub>CN)

|                        |                                                |                        |                                                                               |
|------------------------|------------------------------------------------|------------------------|-------------------------------------------------------------------------------|
| FW                     | 347.3193                                       | Formula                | C <sub>19</sub> H <sub>12</sub> D <sub>2</sub> F <sub>3</sub> NO <sub>2</sub> |
| Acquisition Time (sec) | 2.5559                                         | Comment                | Imported from UGXNMR                                                          |
| File Name              | D:\BN\output\2017\07.ep\01\BM-1109-2.H_001001r | Frequency (MHz)        | 400.13                                                                        |
| Original Points Count  | 16384                                          | Points Count           | 65536                                                                         |
| Sweep Width (Hz)       | 6410.26                                        | Temperature (degree C) | 27.000                                                                        |
|                        |                                                | Date                   | 01 Jul 2017 14:00:30                                                          |
|                        |                                                | Nucleus                | 1H                                                                            |
|                        |                                                | Number of Transients   | 4                                                                             |
|                        |                                                | Pulse Sequence         | zg30                                                                          |
|                        |                                                | Solvent                | ACETONITRILE-D3                                                               |

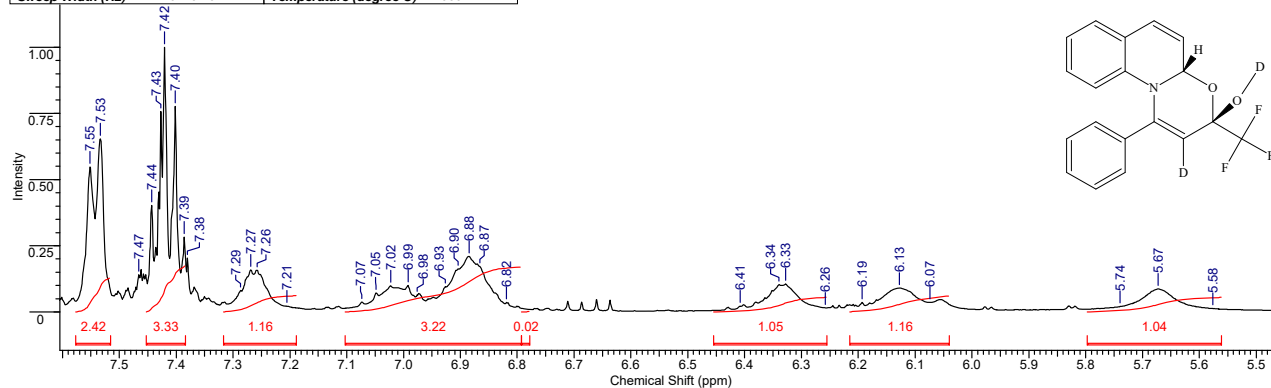

<sup>1</sup>H NMR spectrum of (3R\*,4aR\*)-3' (400.1 MHz, CD<sub>3</sub>CN)

|                        |                                                |                        |                                                                               |
|------------------------|------------------------------------------------|------------------------|-------------------------------------------------------------------------------|
| FW                     | 347.3193                                       | Formula                | C <sub>19</sub> H <sub>12</sub> D <sub>2</sub> F <sub>3</sub> NO <sub>2</sub> |
| Acquisition Time (sec) | 2.5559                                         | Comment                | Imported from UGXNMR                                                          |
| File Name              | D:\BN\output\2017\06.ep\1\BM-1109-R2.H_001001r | Frequency (MHz)        | 400.13                                                                        |
| Original Points Count  | 16384                                          | Points Count           | 65536                                                                         |
| Sweep Width (Hz)       | 6410.26                                        | Temperature (degree C) | 27.000                                                                        |
|                        |                                                | Date                   | 16 Jun 2017 15:14:54                                                          |
|                        |                                                | Nucleus                | 1H                                                                            |
|                        |                                                | Pulse Sequence         | zg30                                                                          |
|                        |                                                | Solvent                | CHLOROFORM-D                                                                  |

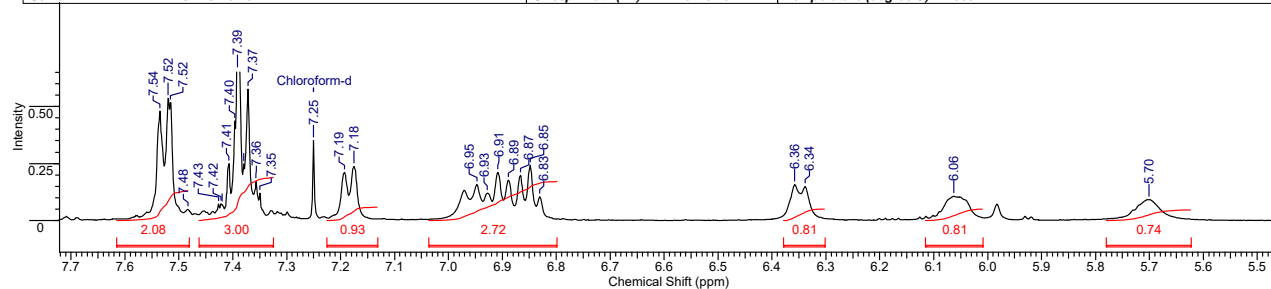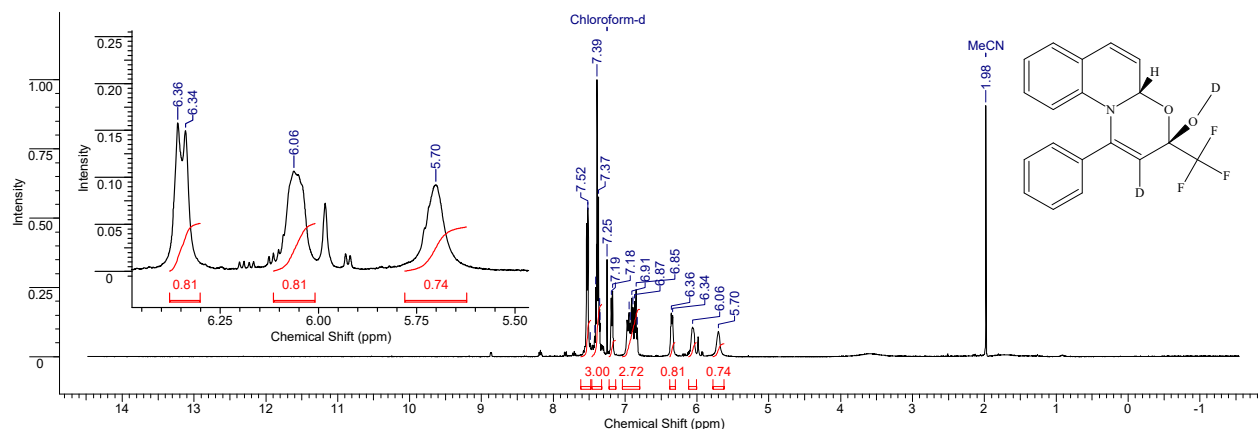

<sup>1</sup>H NMR spectrum of (3R\*,4aR\*)-3' (400.1 MHz, CDCl<sub>3</sub>)

|    |          |         |                                                                               |
|----|----------|---------|-------------------------------------------------------------------------------|
| FW | 347.3193 | Formula | C <sub>19</sub> H <sub>12</sub> D <sub>2</sub> F <sub>3</sub> NO <sub>2</sub> |
|----|----------|---------|-------------------------------------------------------------------------------|

|                        |                                                 |                       |                      |                        |                      |
|------------------------|-------------------------------------------------|-----------------------|----------------------|------------------------|----------------------|
| Acquisition Time (sec) | 0.4999                                          | Comment               | Imported from UXNMR. | Date                   | 01 Jul 2017 14:15:08 |
| File Name              | D:\BN\output\20170707.ep.eu\BM-1109-2.C.002001r | Frequency (MHz)       | 100.61               | Nucleus                | 13C                  |
| Number of Transients   | 513                                             | Original Points Count | 12076                | Points Count           | 65536                |
| Solvent                | CHLOROFORM-D                                    | Sweep Width (Hz)      | 24154.59             | Pulse Sequence         | zgpg30               |
|                        |                                                 |                       |                      | Temperature (degree C) | 27.000               |

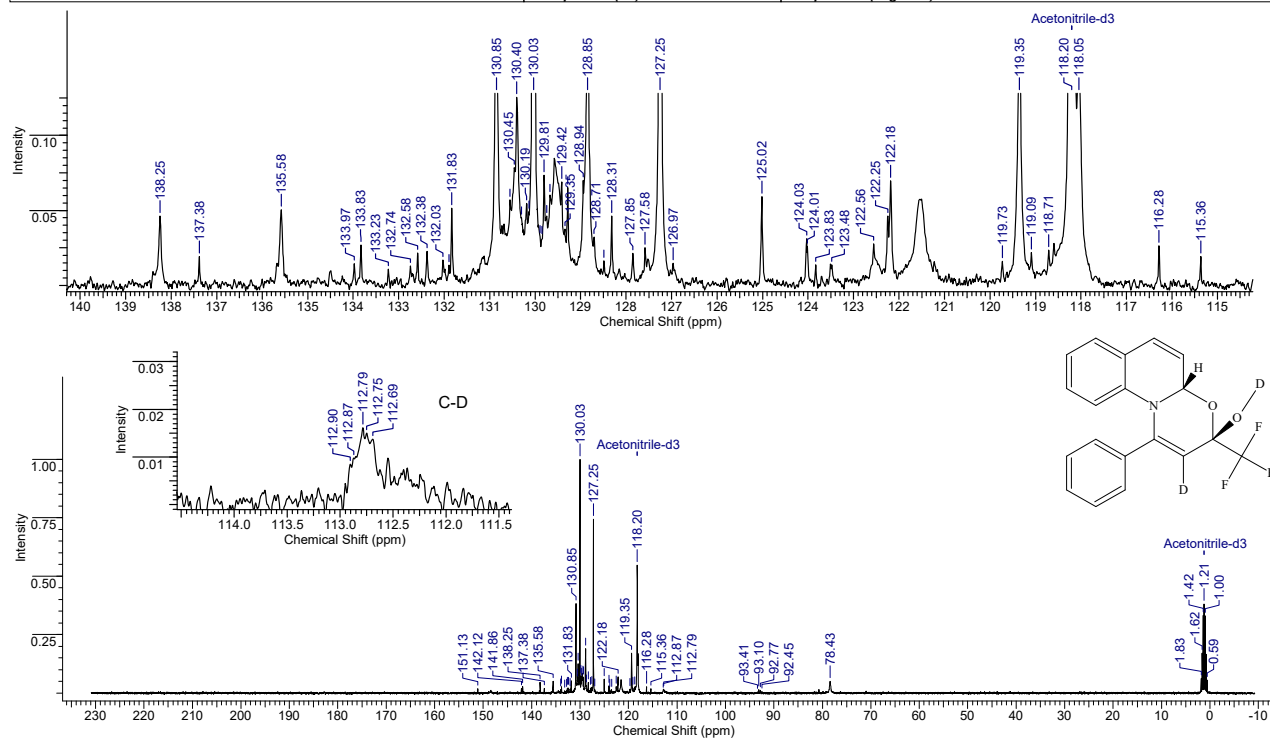

<sup>13</sup>C NMR spectrum of (3R\*,4aR\*)-3' (100.6 MHz, CD<sub>3</sub>CN)

12 Jul 2017

|    |          |         |                                                                               |
|----|----------|---------|-------------------------------------------------------------------------------|
| FW | 347.3193 | Formula | C <sub>19</sub> H <sub>12</sub> D <sub>2</sub> F <sub>3</sub> NO <sub>2</sub> |
|----|----------|---------|-------------------------------------------------------------------------------|

|                        |                                                 |                       |                      |                        |                      |
|------------------------|-------------------------------------------------|-----------------------|----------------------|------------------------|----------------------|
| Acquisition Time (sec) | 0.4999                                          | Comment               | Imported from UXNMR. | Date                   | 16 Jun 2017 15:31:16 |
| File Name              | D:\BN\output\20170606.ep.i\BM-1109-R2.C.002001r | Frequency (MHz)       | 100.61               | Nucleus                | 13C                  |
| Number of Transients   | 505                                             | Original Points Count | 12076                | Points Count           | 65536                |
| Solvent                | CHLOROFORM-D                                    | Sweep Width (Hz)      | 24154.59             | Pulse Sequence         | zgpg30               |
|                        |                                                 |                       |                      | Temperature (degree C) | 27.000               |

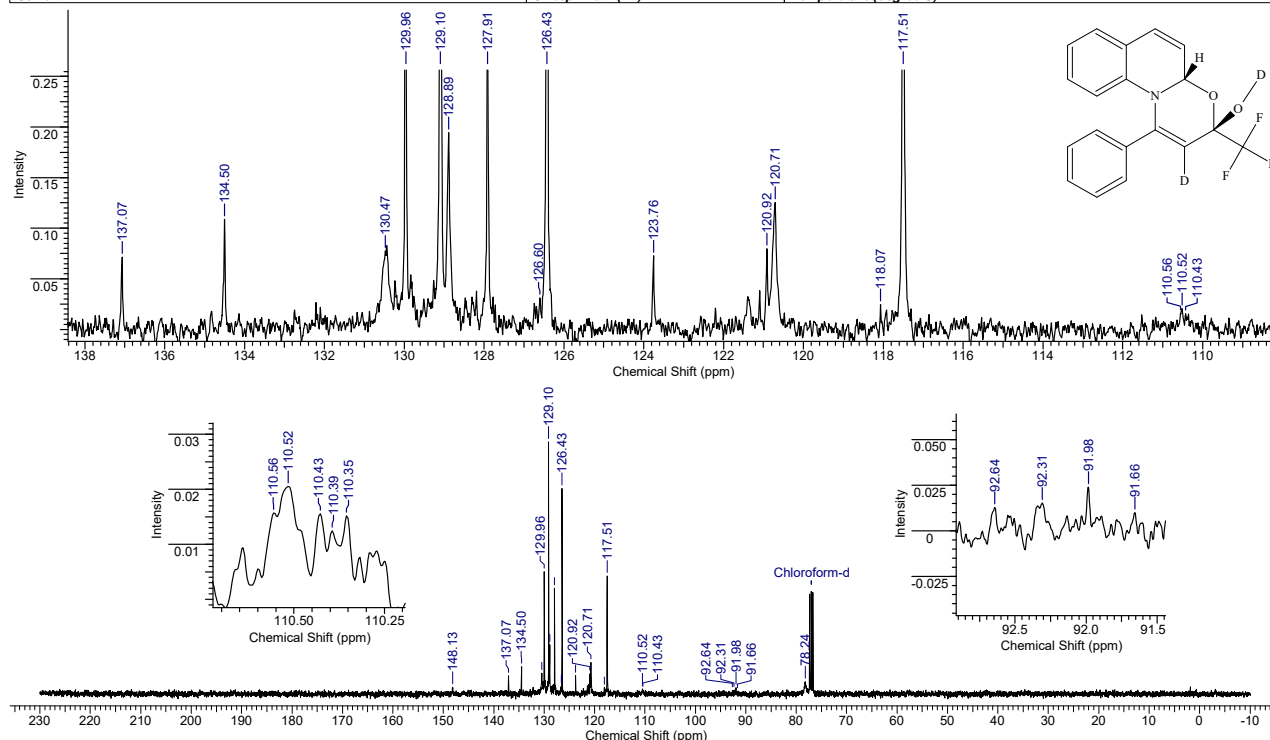

<sup>13</sup>C NMR spectrum of (3R\*,4aR\*)-3' (100.6 MHz, CDCl<sub>3</sub>)

|                        |                                                                                  |                        |                                                                               |
|------------------------|----------------------------------------------------------------------------------|------------------------|-------------------------------------------------------------------------------|
| FW                     | 347.3193                                                                         | Formula                | C <sub>19</sub> H <sub>12</sub> D <sub>2</sub> F <sub>3</sub> NO <sub>2</sub> |
| Acquisition Time (sec) | 1.5000                                                                           | Date                   | Jun 14 2017                                                                   |
| File Name              | D:\BN\Docs (BN)\vasiliy\SPEC_BM_FI2017.07.06_FIBM-1109-R_20170614_01\FLUORINE_01 |                        |                                                                               |
| Frequency (MHz)        | 376.31                                                                           | Nucleus                | 19F                                                                           |
| Points Count           | 262144                                                                           | Pulse Sequence         | s2pul                                                                         |
| Number of Transients   | 16                                                                               | Original Points Count  | 133929                                                                        |
| Sweep Width (Hz)       | 89285.71                                                                         | Temperature (degree C) | 25.000                                                                        |
| Solvent                | CHLOROFORM-D                                                                     |                        |                                                                               |

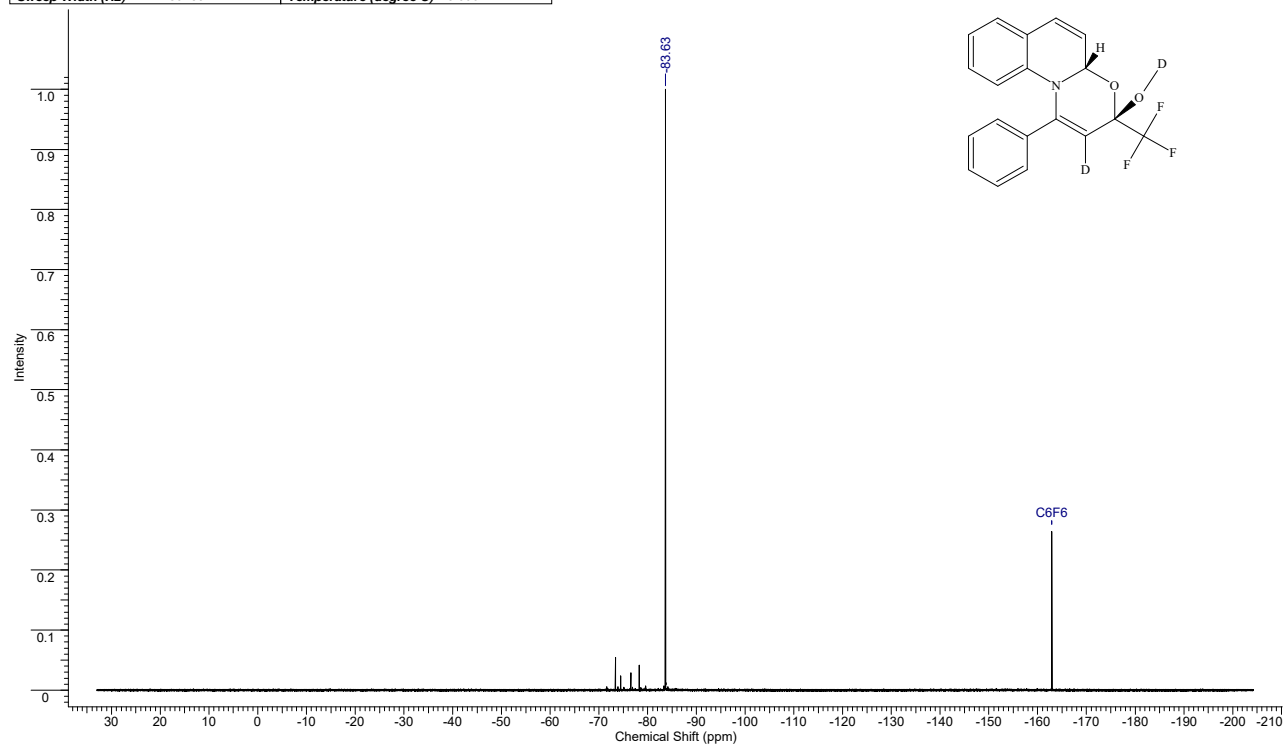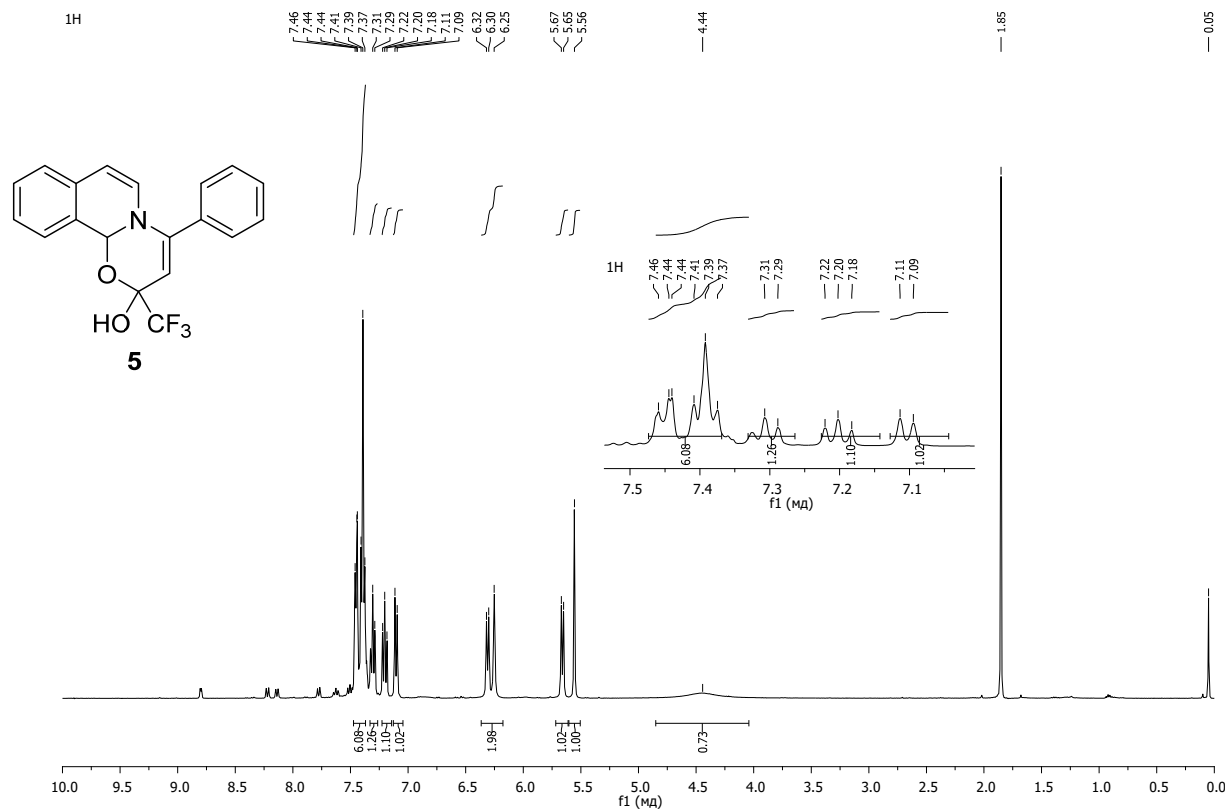

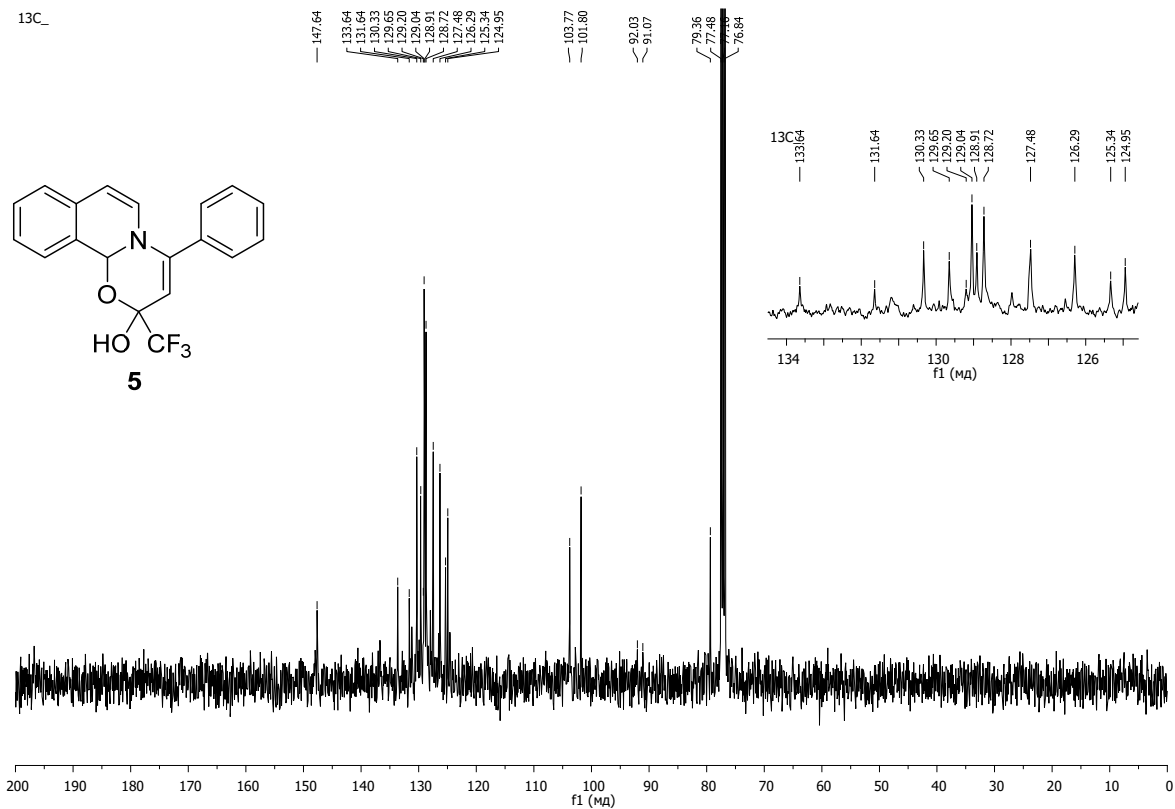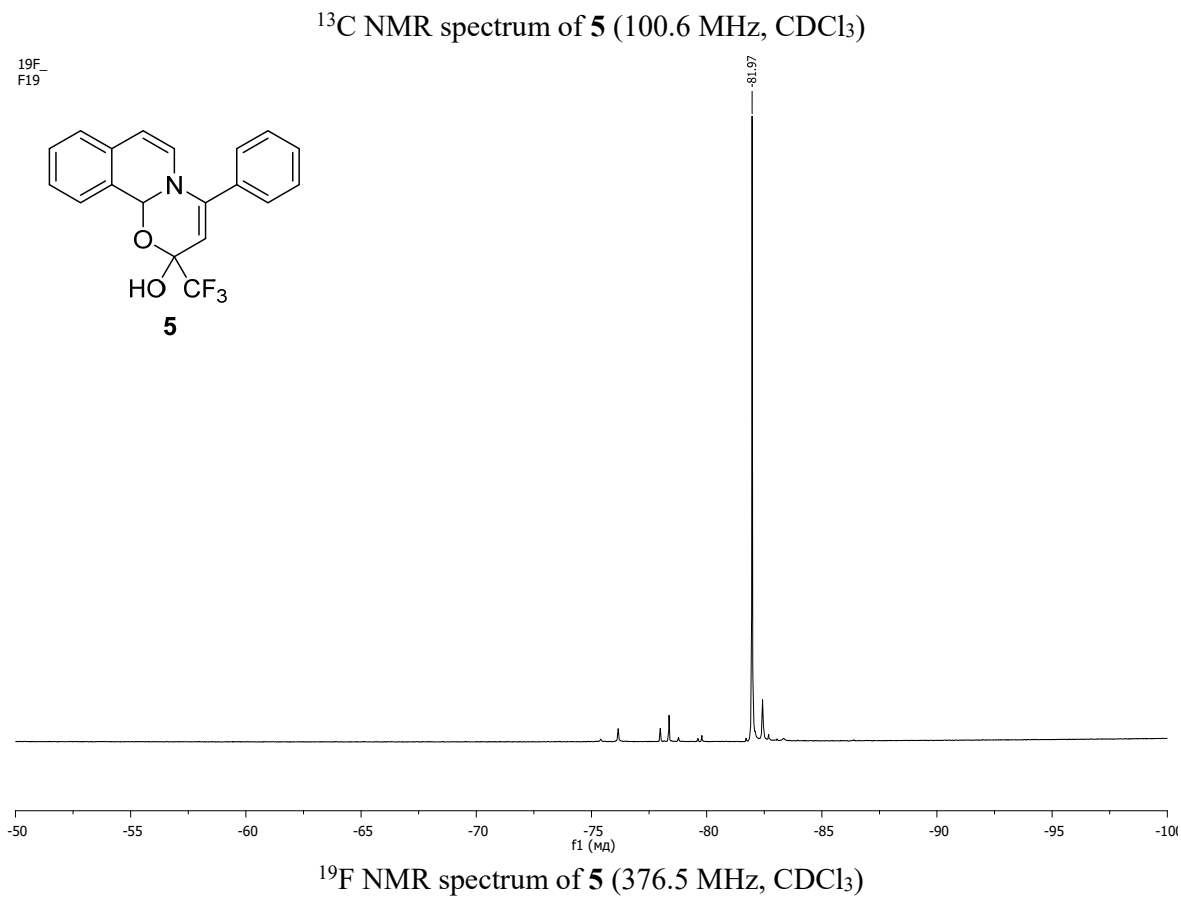



|    |          |         |                                                                              |
|----|----------|---------|------------------------------------------------------------------------------|
| FW | 346.3033 | Formula | C <sub>18</sub> H <sub>13</sub> F <sub>3</sub> N <sub>2</sub> O <sub>2</sub> |
|----|----------|---------|------------------------------------------------------------------------------|

|                        |                                                            |                      |                     |                       |                      |
|------------------------|------------------------------------------------------------|----------------------|---------------------|-----------------------|----------------------|
| Acquisition Time (sec) | 2.5559                                                     | Comment              | Imported from UXNMR | Date                  | 22 Jan 2018 15:42:48 |
| File Name              | D:\Comp_316\BN\output\2018\22.01.2018\BM-1286-R2.H_001001r |                      |                     | Frequency (MHz)       | 400.13               |
| Nucleus                | <sup>1</sup> H                                             | Number of Transients | 4                   | Original Points Count | 16384                |
| Pulse Sequence         | zg30                                                       | Solvent              | ACETONITRILE-D3     | Sweep Width (Hz)      | 6410.26              |
| Temperature (degree C) | 27.000                                                     |                      |                     |                       |                      |

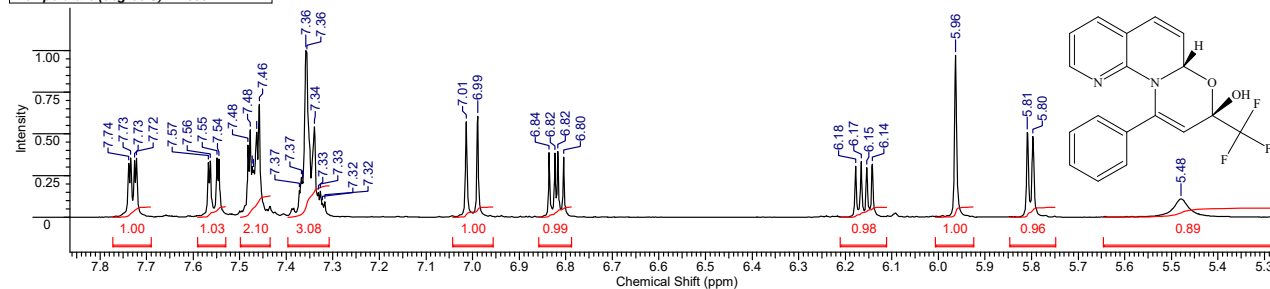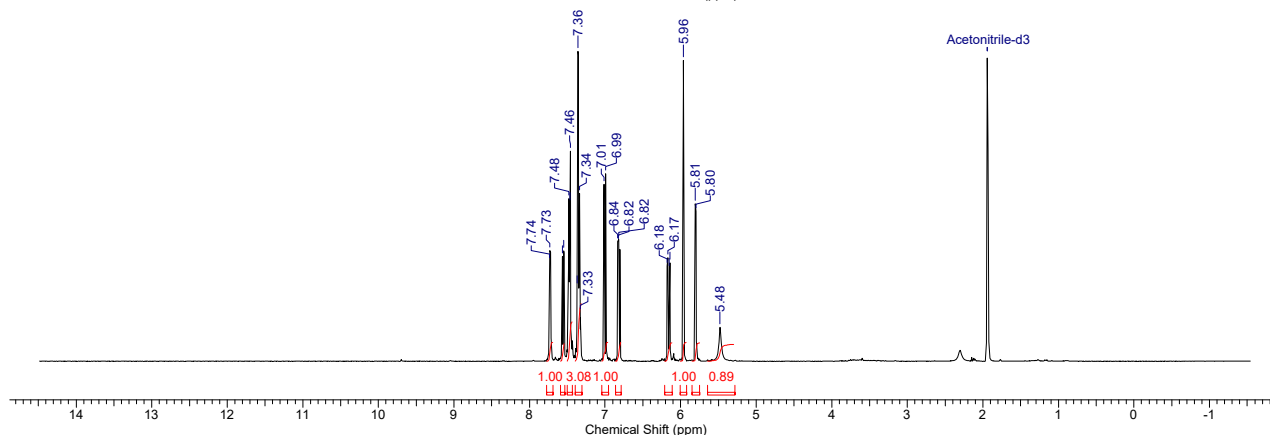

<sup>1</sup>H NMR spectrum of 7 (400.1 MHz, CD<sub>3</sub>CN)

|    |          |         |                                                                              |
|----|----------|---------|------------------------------------------------------------------------------|
| FW | 346.3033 | Formula | C <sub>18</sub> H <sub>13</sub> F <sub>3</sub> N <sub>2</sub> O <sub>2</sub> |
|----|----------|---------|------------------------------------------------------------------------------|

|                        |                                                            |                      |                     |                       |                      |
|------------------------|------------------------------------------------------------|----------------------|---------------------|-----------------------|----------------------|
| Acquisition Time (sec) | 0.4999                                                     | Comment              | Imported from UXNMR | Date                  | 22 Jan 2018 15:48:18 |
| File Name              | D:\Comp_316\BN\output\2018\22.01.2018\BM-1286-R2.C_002001r |                      |                     | Frequency (MHz)       | 100.61               |
| Nucleus                | <sup>13</sup> C                                            | Number of Transients | 147                 | Original Points Count | 12076                |
| Pulse Sequence         | zgpg30                                                     | Solvent              | DEUTERIUM OXIDE     | Sweep Width (Hz)      | 24154.59             |
| Temperature (degree C) | 27.000                                                     |                      |                     |                       |                      |

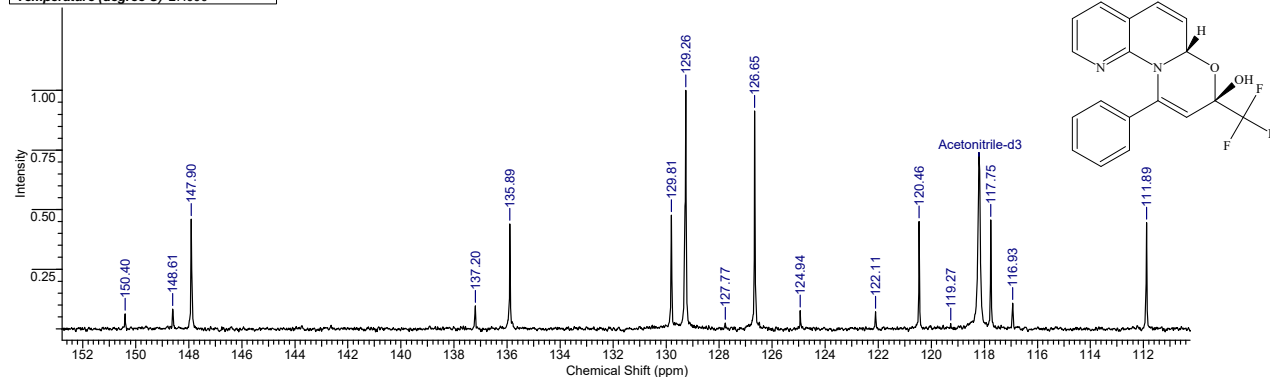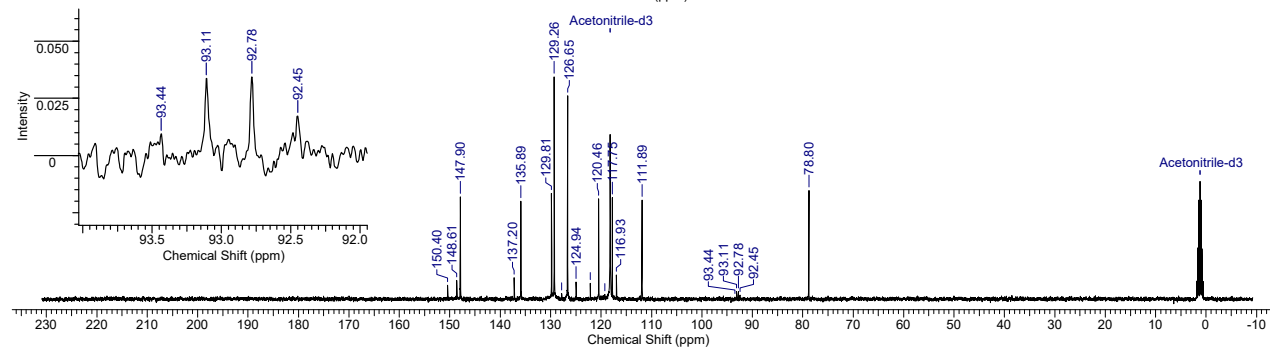

<sup>13</sup>C NMR spectrum of 7 (100.6 MHz, CD<sub>3</sub>CN)

|    |          |         |                                                                              |
|----|----------|---------|------------------------------------------------------------------------------|
| FW | 346.3033 | Formula | C <sub>18</sub> H <sub>13</sub> F <sub>3</sub> N <sub>2</sub> O <sub>2</sub> |
|----|----------|---------|------------------------------------------------------------------------------|

|                        |          |                        |                 |                      |                                                                                 |                       |        |
|------------------------|----------|------------------------|-----------------|----------------------|---------------------------------------------------------------------------------|-----------------------|--------|
| Acquisition Time (sec) | 2.4117   | Date                   | Jan 22 2018     | File Name            | D:\Comp_316\BN\output\F19\F_2018\2018.01.22\BM-1286-R-F_20180122_01\FLUORINE_01 |                       |        |
| Frequency (MHz)        | 376.31   | Nucleus                | <sup>19</sup> F | Number of Transients | 8                                                                               | Original Points Count | 231897 |
| Points Count           | 262144   | Pulse Sequence         | s2pul           | Solvent              | CHLOROFORM-D                                                                    |                       |        |
| Sweep Width (Hz)       | 96153.84 | Temperature (degree C) | 5.000           |                      |                                                                                 |                       |        |

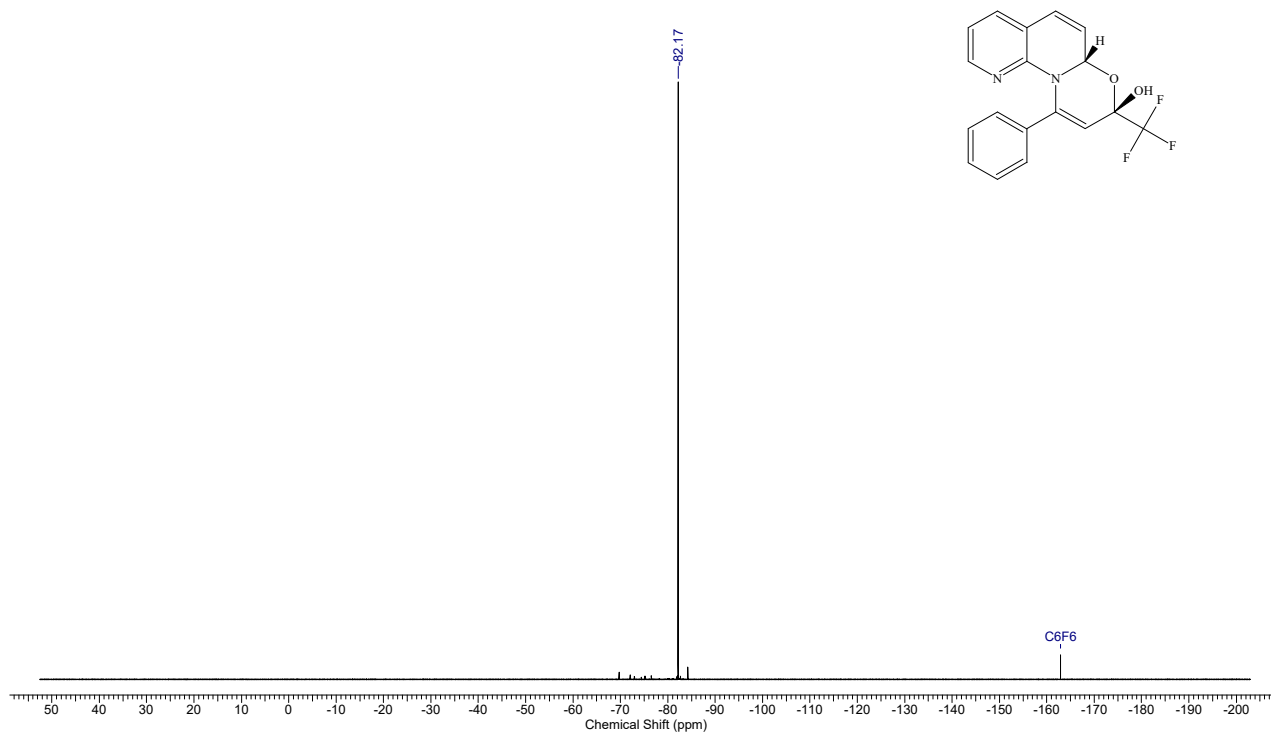

## Monitoring of the reaction mixture by $^{19}\text{F}$ NMR spectrum

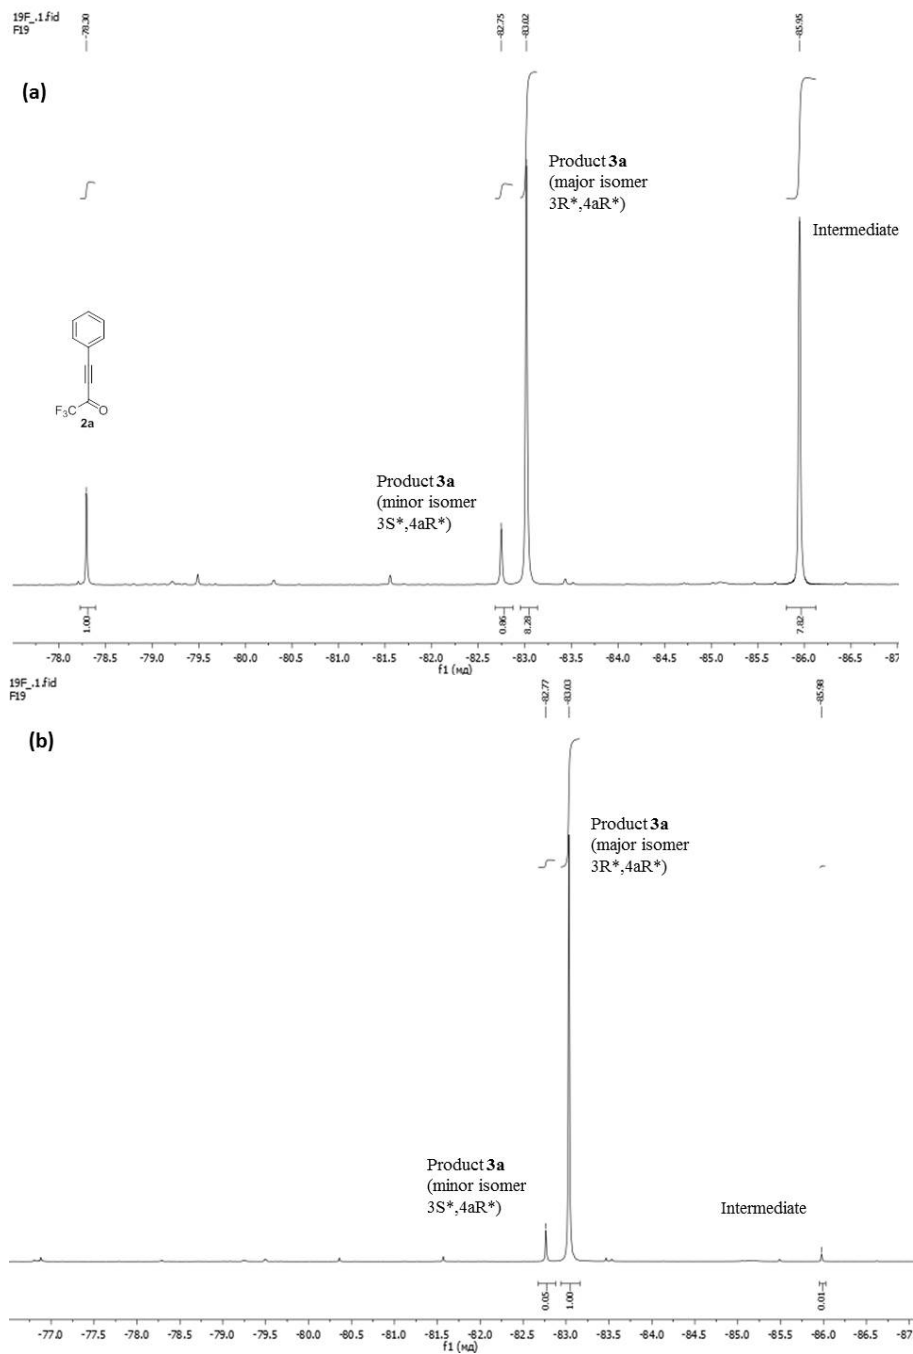

**Fig. 1.** The  $^{19}\text{F}$  NMR spectrum of mixture of quinoline **1a** phenyltrifluoroacetylacetylene **2a** with after 4 hours (**a**) and after 40 hours (**b**).

## X-ray diffraction structural analysis data

The X-ray diffraction structural analysis was carried out on a Bruker D8 Venture monocrystal diffractometer with a Photon 100 detector using  $\omega$ - $2\theta$  scanning. The reflection intensities were integrated using the Bruker SAINT monitoring program. X-ray absorption by the crystal was taken into account by analysis of the intensities of equivalent reflections. After averaging the intensities of equivalent reflections, only independent reflections were used. The search for a model was carried out using the SHELXS program (G. M. Sheldrick, *Acta Crystallogr., Sect. A: Found. Crystallogr.* **2008**, *A64*, 112) and direct methods, which gave the coordinates of all the non-hydrogen atoms. The structures obtained were refined by method of least squares using the SHELXL program.

The determination of the unit cell and the data collection for 1-phenyl-3-(trifluoromethyl)-3*H*,4*aH*-[1,3]oxazino[3,2-*a*]quinolin-3-ol (**3a**) (Fig. 2) was performed at 100.0(2) K using the  $\omega$ - $\phi$  scan technique. A specimen of  $C_{19}H_{14}NO_2F_3$ , approximate dimensions 0.210 mm x 0.330 mm x 0.470 mm, pale, yellow, irregular crystal was used for the X-ray crystallographic analysis. The X-ray intensity data were measured. The integration of the data using an monoclinic unit cell with *C2/c* space group yielded a total of 21815 reflections to a maximum  $\theta$  angle of 26.14° (0.81 Å resolution), of which 3200 were independent (average redundancy 6.817, completeness = 99.4%,  $R_{int}$  = 2.54%,  $R_{sig}$  = 1.53%) and 2855 (89.22%) were greater than  $2\sigma(F_2)$ . The final cell constants of  $a = 19.9333(7)$  Å,  $b = 9.8491(3)$  Å,  $c = 16.6571(6)$  Å,  $\beta = 98.9990(10)^\circ$ ,  $Z = 8$ , volume = 3229.95(19) Å<sup>3</sup>, are based upon the refinement of the XYZ-centroids of 9996 reflections above  $20 \sigma(I)$  with  $4.952^\circ < 2\theta < 52.27^\circ$ . Data were corrected for absorption effects using the multi-scan method (SADABS). The ratio of minimum to maximum apparent transmission was 0.912. The H atoms were determined from a difference Fourier synthesis. The unit cell is presented by 2 enantiomers: (3*R*,4*aR*)- and (3*S*,4*aS*)-1-phenyl-3-(trifluoromethyl)-3*H*,4*aH*-[1,3]oxazino[3,2-*a*]quinolin-3-ol (**3a**).

The final anisotropic full-matrix least-squares refinement on  $F_2$  with 229 variables converged at  $R_1 = 3.34\%$ , for the observed data and  $wR_2 = 9.00\%$  for all data. The goodness-of-fit was 1.032. The largest peak in the final difference electron density synthesis was 0.34 e<sup>-</sup>/Å<sup>3</sup> and the largest hole was -0.240 e<sup>-</sup>/Å<sup>3</sup> with an RMS deviation of 0.055 e<sup>-</sup>/Å<sup>3</sup>. On the basis of the final model, the calculated density was 1.420 g/cm<sup>3</sup> and  $F(000)$ , 1424 e<sup>-</sup>. CCDC 1545030.

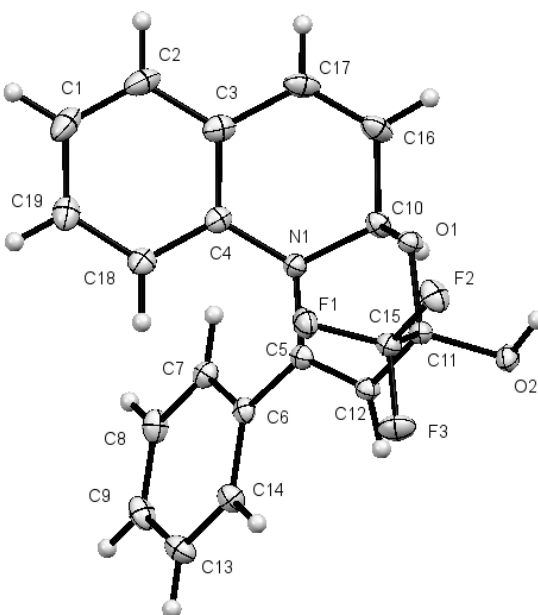

Figure 2. X-ray structure of 1-phenyl-3-(trifluoromethyl)-3*H*,4*aH*-[1,3]oxazino[3,2-*a*]quinolin-3-ol (3a). Thermal ellipsoids set at 50% probability.

Table S2. Bond Lengths for 3a.

| Atom | Atom | Length/Å   | Atom | Atom | Length/Å   |
|------|------|------------|------|------|------------|
| F1   | C15  | 1.3341(14) | C4   | C18  | 1.3992(18) |
| F2   | C15  | 1.3452(14) | C5   | C6   | 1.4824(16) |
| F3   | C15  | 1.3422(14) | C5   | C12  | 1.3398(18) |
| O1   | C10  | 1.4758(15) | C6   | C7   | 1.3989(18) |
| O1   | C11  | 1.4217(15) | C6   | C14  | 1.3967(18) |
| O2   | C11  | 1.3961(15) | C7   | C8   | 1.3889(18) |
| N1   | C4   | 1.4097(16) | C8   | C9   | 1.385(2)   |
| N1   | C5   | 1.4146(16) | C9   | C13  | 1.388(2)   |
| N1   | C10  | 1.4383(15) | C10  | C16  | 1.4881(17) |
| C1   | C2   | 1.386(2)   | C11  | C12  | 1.5068(16) |
| C1   | C19  | 1.389(2)   | C11  | C15  | 1.5429(18) |
| C2   | C3   | 1.3952(19) | C13  | C14  | 1.3895(18) |
| C3   | C4   | 1.4091(18) | C16  | C17  | 1.330(2)   |
| C3   | C17  | 1.4537(19) | C18  | C19  | 1.3912(19) |

Table S3. Bond Angles for 3a.

| Atom | Atom | Atom | Angle/° | Atom | Atom | Atom | Angle/° |
|------|------|------|---------|------|------|------|---------|
|------|------|------|---------|------|------|------|---------|

|     |     |     |            |     |     |     |            |
|-----|-----|-----|------------|-----|-----|-----|------------|
| C11 | O1  | C10 | 111.43(9)  | N1  | C10 | O1  | 108.50(9)  |
| C4  | N1  | C5  | 123.03(10) | N1  | C10 | C16 | 113.67(11) |
| C4  | N1  | C10 | 120.56(10) | O1  | C11 | C12 | 113.57(10) |
| C5  | N1  | C10 | 111.27(10) | O1  | C11 | C15 | 103.48(9)  |
| C2  | C1  | C19 | 119.64(13) | O2  | C11 | O1  | 112.08(9)  |
| C1  | C2  | C3  | 120.75(13) | O2  | C11 | C12 | 108.62(10) |
| C2  | C3  | C4  | 119.29(13) | O2  | C11 | C15 | 109.41(10) |
| C2  | C3  | C17 | 121.89(12) | C12 | C11 | C15 | 109.53(10) |
| C4  | C3  | C17 | 118.69(12) | C5  | C12 | C11 | 122.45(11) |
| C3  | C4  | N1  | 117.88(11) | C9  | C13 | C14 | 120.32(12) |
| C18 | C4  | N1  | 122.43(11) | C13 | C14 | C6  | 120.38(12) |
| C18 | C4  | C3  | 119.68(12) | F1  | C15 | F2  | 107.35(10) |
| N1  | C5  | C6  | 117.99(11) | F1  | C15 | F3  | 107.30(10) |
| C12 | C5  | N1  | 117.11(11) | F1  | C15 | C11 | 111.94(10) |
| C12 | C5  | C6  | 124.33(11) | F2  | C15 | C11 | 111.60(10) |
| C7  | C6  | C5  | 120.29(11) | F3  | C15 | F2  | 106.95(10) |
| C14 | C6  | C5  | 120.65(11) | F3  | C15 | C11 | 111.43(10) |
| C14 | C6  | C7  | 118.98(11) | C17 | C16 | C10 | 121.19(12) |
| C8  | C7  | C6  | 120.14(12) | C16 | C17 | C3  | 121.63(12) |
| C9  | C8  | C7  | 120.61(12) | C19 | C18 | C4  | 119.63(12) |
| C8  | C9  | C13 | 119.57(12) | C1  | C19 | C18 | 120.78(13) |
| O1  | C10 | C16 | 108.12(10) |     |     |     |            |

**Table S4. Torsion Angles for 3a.**

| A  | B   | C   | D   | Angle/°     | A   | B   | C   | D   | Angle/°     |
|----|-----|-----|-----|-------------|-----|-----|-----|-----|-------------|
| O1 | C10 | C16 | C17 | -106.99(14) | C5  | N1  | C10 | C16 | 175.54(10)  |
| O1 | C11 | C12 | C5  | -15.32(16)  | C5  | C6  | C7  | C8  | 176.73(11)  |
| O1 | C11 | C15 | F1  | 61.72(12)   | C5  | C6  | C14 | C13 | -176.90(11) |
| O1 | C11 | C15 | F2  | -58.63(12)  | C6  | C5  | C12 | C11 | -175.68(11) |
| O1 | C11 | C15 | F3  | -178.12(9)  | C6  | C7  | C8  | C9  | 0.49(19)    |
| O2 | C11 | C12 | C5  | -140.75(12) | C7  | C6  | C14 | C13 | 0.00(18)    |
| O2 | C11 | C15 | F1  | -178.66(9)  | C7  | C8  | C9  | C13 | -0.6(2)     |
| O2 | C11 | C15 | F2  | 60.99(13)   | C8  | C9  | C13 | C14 | 0.4(2)      |
| O2 | C11 | C15 | F3  | -58.49(13)  | C9  | C13 | C14 | C6  | -0.1(2)     |
| N1 | C4  | C18 | C19 | -175.01(11) | C10 | O1  | C11 | O2  | 101.39(11)  |
| N1 | C5  | C6  | C7  | 19.79(16)   | C10 | O1  | C11 | C12 | -22.17(13)  |
| N1 | C5  | C6  | C14 | -163.35(11) | C10 | O1  | C11 | C15 | -140.83(9)  |
| N1 | C5  | C12 | C11 | 13.24(17)   | C10 | N1  | C4  | C3  | 27.92(16)   |
| N1 | C10 | C16 | C17 | 13.54(18)   | C10 | N1  | C4  | C18 | -152.58(12) |
| C1 | C2  | C3  | C4  | 2.3(2)      | C10 | N1  | C5  | C6  | -144.80(11) |
| C1 | C2  | C3  | C17 | -173.53(13) | C10 | N1  | C5  | C12 | 26.86(15)   |
| C2 | C1  | C19 | C18 | -2.7(2)     | C10 | C16 | C17 | C3  | 2.9(2)      |
| C2 | C3  | C4  | N1  | 174.08(11)  | C11 | O1  | C10 | N1  | 61.23(12)   |
| C2 | C3  | C4  | C18 | -5.43(18)   | C11 | O1  | C10 | C16 | -175.06(10) |
| C2 | C3  | C17 | C16 | 170.74(13)  | C12 | C5  | C6  | C7  | -151.22(13) |

|    |     |     |     |             |     |     |     |     |            |
|----|-----|-----|-----|-------------|-----|-----|-----|-----|------------|
| C3 | C4  | C18 | C19 | 4.48(18)    | C12 | C5  | C6  | C14 | 25.64(18)  |
| C4 | N1  | C5  | C6  | 60.56(15)   | C12 | C11 | C15 | F1  | -59.71(13) |
| C4 | N1  | C5  | C12 | -127.78(12) | C12 | C11 | C15 | F2  | 179.94(10) |
| C4 | N1  | C10 | O1  | 91.21(13)   | C12 | C11 | C15 | F3  | 60.46(13)  |
| C4 | N1  | C10 | C16 | -29.10(16)  | C14 | C6  | C7  | C8  | -0.19(18)  |
| C4 | C3  | C17 | C16 | -5.14(19)   | C15 | C11 | C12 | C5  | 99.81(14)  |
| C4 | C18 | C19 | C1  | -0.39(19)   | C17 | C3  | C4  | N1  | -9.93(17)  |
| C5 | N1  | C4  | C3  | -179.69(11) | C17 | C3  | C4  | C18 | 170.56(12) |
| C5 | N1  | C4  | C18 | -0.19(18)   | C19 | C1  | C2  | C3  | 1.8(2)     |
| C5 | N1  | C10 | O1  | -64.14(12)  |     |     |     |     |            |

The determination of the unit cell and the data collection for 5-bromo-1-phenyl-3-(trifluoromethyl)-3*H*,4*aH*-dihydro-[1,3]oxazino[3,2-*a*]quinolin-3-ol (**3k'**) (Fig. 3) was performed at 296.15(2) K using the  $\omega$ - $\phi$  scan technique. A specimen of  $C_{19}H_{13}N_1O_2F_3Br_1 \cdot C_9H_6N_1Br_1$ , approximate dimensions 0.228 mm x 0.315 mm x 0.513 mm, lustrous, light, block-like crystal was used for the X-ray crystallographic analysis. The X-ray intensity data were measured. The integration of the data using an monoclinic unit cell with  $P2_1/n$  space group yielded a total of 52763 reflections to a maximum  $\theta$  angle of 26.73° (0.79 Å resolution), of which 5518 were independent (average redundancy 9.562, completeness = 99.7%,  $R_{int} = 5.89\%$ ,  $R_{sig} = 3.76\%$ ) and 3696 (66.98%) were greater than  $2\sigma(F_2)$ . The final cell constants of  $a = 10.054(5)$  Å,  $b = 15.229(9)$  Å,  $c = 17.101(10)$  Å,  $\beta = 95.46(2)^\circ$ ,  $Z = 4$ , volume = 2606.3 Å<sup>3</sup>, are based upon the refinement of the XYZ-centroids of 9890 reflections above  $20 \sigma(I)$  with  $4.541^\circ < 2\theta < 47.61^\circ$ . Data were corrected for absorption effects using the multi-scan method (SADABS). The ratio of minimum to maximum apparent transmission was 0.543. The calculated minimum and maximum transmission coefficients (based on crystal size) are 0.2940 and 0.5330. The structure was solved and refined using the Bruker SHELXTL Software Package (G. M. Sheldrick, *Acta Crystallogr., Sect. A: Found. Crystallogr.* **2008**, *A64*, 112). The H atoms were determined from a difference Fourier synthesis. The unit cell is presented by 2 enantiomers: (3*R*,4*aR*)- and (3*S*,4*aS*)-5-bromo-1-phenyl-3-(trifluoromethyl)-3*H*,4*aH*-dihydro-[1,3]oxazino[3,2-*a*]quinolin-3-ol (**3k'**).

The final anisotropic full-matrix least-squares refinement on F2 with 337 variables converged at  $R_1 = 4.45\%$ , for the observed data and  $wR_2 = 8.89\%$  for all data. The goodness-of-fit was 1.021. The largest peak in the final difference electron density synthesis was 0.56 e<sup>-</sup>/Å<sup>3</sup> and the largest hole was -0.460 e<sup>-</sup>/Å<sup>3</sup> with an RMS deviation of 0.076 e<sup>-</sup>/Å<sup>3</sup>. On the basis of the final model, the calculated density was 1.611 g/cm<sup>3</sup> and F(000), 1256 e<sup>-</sup>. CCDC 1545031.

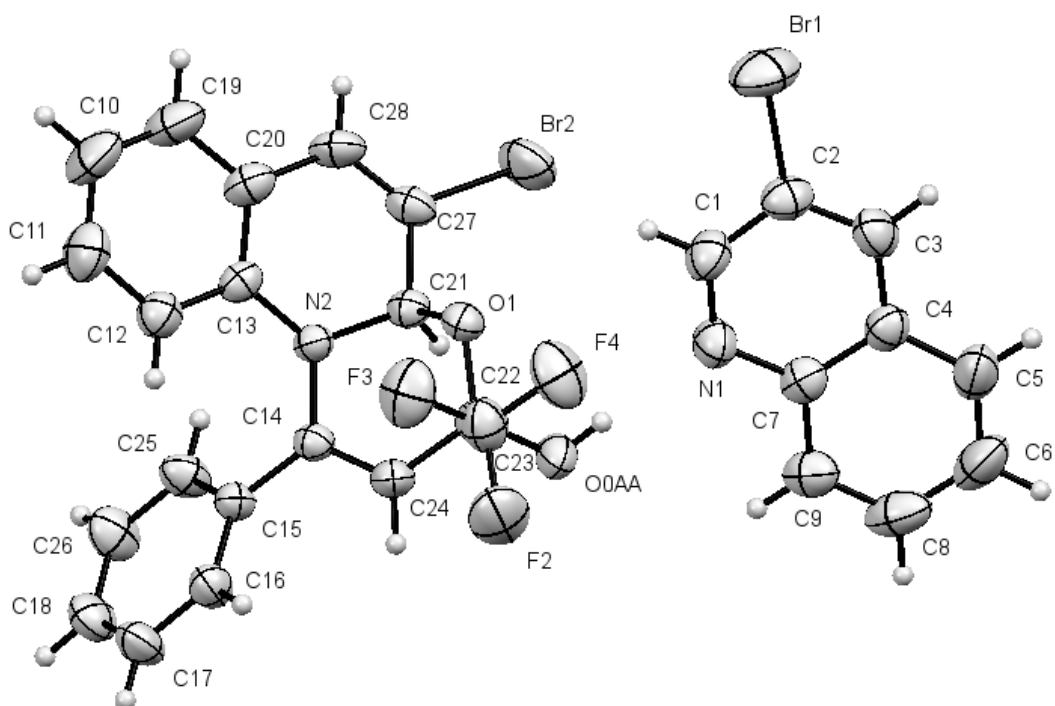

Figure 3. X-ray structure of 5-bromo-1-phenyl-3-(trifluoromethyl)-3*H*,4*aH*-dihydro-[1,3]oxazino[3,2-*a*]quinolin-3-ol (**3k'**). Thermal ellipsoids set at 50% probability.

Table S5. Bond Lengths for **3k'**.

| Atom | Atom | Length/Å | Atom | Atom | Length/Å |
|------|------|----------|------|------|----------|
| Br1  | C2   | 1.893(3) | C8   | C9   | 1.360(5) |
| Br2  | C27  | 1.892(3) | C10  | C11  | 1.375(5) |
| O1   | C21  | 1.455(3) | C10  | C19  | 1.366(5) |
| O1   | C22  | 1.419(3) | C11  | C12  | 1.390(5) |
| F2   | C23  | 1.342(4) | C12  | C13  | 1.394(4) |
| F3   | C23  | 1.328(4) | C13  | C20  | 1.402(4) |
| F4   | C23  | 1.335(4) | C14  | C15  | 1.480(4) |
| O0AA | C22  | 1.387(3) | C14  | C24  | 1.339(4) |
| N1   | C1   | 1.313(4) | C15  | C16  | 1.389(4) |
| N1   | C7   | 1.372(4) | C15  | C25  | 1.384(4) |
| N2   | C13  | 1.413(3) | C16  | C17  | 1.379(4) |
| N2   | C14  | 1.425(3) | C17  | C18  | 1.364(5) |
| N2   | C21  | 1.439(3) | C18  | C26  | 1.367(5) |
| C1   | C2   | 1.394(5) | C19  | C20  | 1.399(5) |
| C2   | C3   | 1.352(5) | C20  | C28  | 1.449(4) |
| C3   | C4   | 1.423(4) | C21  | C27  | 1.490(4) |
| C4   | C5   | 1.412(5) | C22  | C23  | 1.535(4) |
| C4   | C7   | 1.411(4) | C22  | C24  | 1.504(4) |
| C5   | C6   | 1.354(5) | C25  | C26  | 1.385(4) |
| C6   | C8   | 1.398(6) | C27  | C28  | 1.322(4) |
| C7   | C9   | 1.411(4) |      |      |          |



Table S6. Bond Angles for 3k'.

| Atom | Atom | Atom | Angle/°  | Atom | Atom | Atom | Angle/°  |
|------|------|------|----------|------|------|------|----------|
| C22  | O1   | C21  | 110.2(2) | C25  | C15  | C16  | 118.1(3) |
| C1   | N1   | C7   | 118.1(3) | C17  | C16  | C15  | 120.5(3) |
| C13  | N2   | C14  | 122.4(2) | C18  | C17  | C16  | 120.6(3) |
| C13  | N2   | C21  | 120.5(2) | C17  | C18  | C26  | 120.0(3) |
| C14  | N2   | C21  | 110.7(2) | C10  | C19  | C20  | 120.9(3) |
| N1   | C1   | C2   | 123.2(3) | C13  | C20  | C28  | 119.0(3) |
| C1   | C2   | Br1  | 117.7(2) | C19  | C20  | C13  | 119.4(3) |
| C3   | C2   | Br1  | 122.1(3) | C19  | C20  | C28  | 121.5(3) |
| C3   | C2   | C1   | 120.3(3) | O1   | C21  | C27  | 108.5(2) |
| C2   | C3   | C4   | 118.9(3) | N2   | C21  | O1   | 110.2(2) |
| C5   | C4   | C3   | 123.9(3) | N2   | C21  | C27  | 112.2(2) |
| C7   | C4   | C3   | 117.2(3) | O1   | C22  | C23  | 104.3(2) |
| C7   | C4   | C5   | 118.8(3) | O1   | C22  | C24  | 112.4(2) |
| C6   | C5   | C4   | 120.6(4) | O0AA | C22  | O1   | 112.5(2) |
| C5   | C6   | C8   | 120.3(4) | O0AA | C22  | C23  | 109.9(3) |
| N1   | C7   | C4   | 122.2(3) | O0AA | C22  | C24  | 107.5(2) |
| N1   | C7   | C9   | 118.4(3) | C24  | C22  | C23  | 110.2(2) |
| C9   | C7   | C4   | 119.4(3) | F2   | C23  | C22  | 110.2(3) |
| C9   | C8   | C6   | 121.1(4) | F3   | C23  | F2   | 107.8(3) |
| C8   | C9   | C7   | 119.8(4) | F3   | C23  | F4   | 107.3(3) |
| C19  | C10  | C11  | 119.8(3) | F3   | C23  | C22  | 112.4(3) |
| C10  | C11  | C12  | 120.9(3) | F4   | C23  | F2   | 107.1(3) |
| C11  | C12  | C13  | 119.9(3) | F4   | C23  | C22  | 111.8(3) |
| C12  | C13  | N2   | 122.5(3) | C14  | C24  | C22  | 124.1(3) |
| C12  | C13  | C20  | 119.0(3) | C15  | C25  | C26  | 120.9(3) |
| C20  | C13  | N2   | 118.5(3) | C18  | C26  | C25  | 120.0(3) |
| N2   | C14  | C15  | 118.6(2) | C21  | C27  | Br2  | 114.6(2) |
| C24  | C14  | N2   | 117.6(2) | C28  | C27  | Br2  | 122.6(2) |
| C24  | C14  | C15  | 123.2(3) | C28  | C27  | C21  | 122.8(3) |
| C16  | C15  | C14  | 121.2(3) | C27  | C28  | C20  | 120.5(3) |
| C25  | C15  | C14  | 120.7(2) |      |      |      |          |

Table S7. Torsion Angles for 3k'.

| A    | B   | C   | D   | Angle/°   | A   | B   | C   | D   | Angle/°   |
|------|-----|-----|-----|-----------|-----|-----|-----|-----|-----------|
| Br1  | C2  | C3  | C4  | 179.8(2)  | C11 | C10 | C19 | C20 | 0.9(6)    |
| Br2  | C27 | C28 | C20 | 179.6(2)  | C11 | C12 | C13 | N2  | -174.4(3) |
| O1   | C21 | C27 | Br2 | 75.4(2)   | C11 | C12 | C13 | C20 | 3.9(5)    |
| O1   | C21 | C27 | C28 | -105.4(3) | C12 | C13 | C20 | C19 | -3.9(5)   |
| O1   | C22 | C23 | F2  | -178.8(2) | C12 | C13 | C20 | C28 | 174.6(3)  |
| O1   | C22 | C23 | F3  | 60.9(3)   | C13 | N2  | C14 | C15 | 61.6(3)   |
| O1   | C22 | C23 | F4  | -59.9(3)  | C13 | N2  | C14 | C24 | -127.4(3) |
| O1   | C22 | C24 | C14 | -2.5(4)   | C13 | N2  | C21 | O1  | 91.3(3)   |
| O0AA | C22 | C23 | F2  | -58.0(3)  | C13 | N2  | C21 | C27 | -29.8(3)  |
| O0AA | C22 | C23 | F3  | -178.3(3) | C13 | C20 | C28 | C27 | -5.9(5)   |

|      |     |     |     |             |     |     |     |      |           |
|------|-----|-----|-----|-------------|-----|-----|-----|------|-----------|
| O0AA | C22 | C23 | F4  | 60.9(3)     | C14 | N2  | C13 | C12  | -6.4(4)   |
| O0AA | C22 | C24 | C14 | -126.9(3)   | C14 | N2  | C13 | C20  | 175.3(3)  |
| N1   | C1  | C2  | Br1 | 179.2(3)    | C14 | N2  | C21 | O1   | -61.2(3)  |
| N1   | C1  | C2  | C3  | -2.2(5)     | C14 | N2  | C21 | C27  | 177.7(2)  |
| N1   | C7  | C9  | C8  | -178.0(3)   | C14 | C15 | C16 | C17  | -176.4(3) |
| N2   | C13 | C20 | C19 | 174.4(3)    | C14 | C15 | C25 | C26  | 177.1(3)  |
| N2   | C13 | C20 | C28 | -7.0(4)     | C15 | C14 | C24 | C22  | 177.5(3)  |
| N2   | C14 | C15 | C16 | -155.6(3)   | C15 | C16 | C17 | C18  | -0.8(5)   |
| N2   | C14 | C15 | C25 | 26.9(4)     | C15 | C25 | C26 | C18  | -0.6(5)   |
| N2   | C14 | C24 | C22 | 7.0(4)      | C16 | C15 | C25 | C26  | -0.5(5)   |
| N2   | C21 | C27 | Br2 | -162.51(19) | C16 | C17 | C18 | C26  | -0.3(5)   |
| N2   | C21 | C27 | C28 | 16.6(4)     | C17 | C18 | C26 | C25  | 1.0(5)    |
| C1   | N1  | C7  | C4  | 2.0(5)      | C19 | C10 | C11 | C12  | -1.0(6)   |
| C1   | N1  | C7  | C9  | -178.8(3)   | C19 | C20 | C28 | C27  | 172.6(3)  |
| C1   | C2  | C3  | C4  | 1.2(5)      | C21 | O1  | C22 | O0AA | 89.0(3)   |
| C2   | C3  | C4  | C5  | -180.0(3)   | C21 | O1  | C22 | C23  | -152.0(2) |
| C2   | C3  | C4  | C7  | 1.1(5)      | C21 | O1  | C22 | C24  | -32.6(3)  |
| C3   | C4  | C5  | C6  | -178.7(4)   | C21 | N2  | C13 | C12  | -155.6(3) |
| C3   | C4  | C7  | N1  | -2.8(4)     | C21 | N2  | C13 | C20  | 26.1(4)   |
| C3   | C4  | C7  | C9  | 178.0(3)    | C21 | N2  | C14 | C15  | -146.5(2) |
| C4   | C5  | C6  | C8  | 0.4(6)      | C21 | N2  | C14 | C24  | 24.5(3)   |
| C4   | C7  | C9  | C8  | 1.2(5)      | C21 | C27 | C28 | C20  | 0.5(5)    |
| C5   | C4  | C7  | N1  | 178.2(3)    | C22 | O1  | C21 | N2   | 66.0(3)   |
| C5   | C4  | C7  | C9  | -1.0(5)     | C22 | O1  | C21 | C27  | -170.7(2) |
| C5   | C6  | C8  | C9  | -0.2(6)     | C23 | C22 | C24 | C14  | 113.4(3)  |
| C6   | C8  | C9  | C7  | -0.6(5)     | C24 | C14 | C15 | C16  | 34.0(4)   |
| C7   | N1  | C1  | C2  | 0.5(5)      | C24 | C14 | C15 | C25  | -143.6(3) |
| C7   | C4  | C5  | C6  | 0.2(5)      | C24 | C22 | C23 | F2   | 60.3(3)   |
| C10  | C11 | C12 | C13 | -1.4(5)     | C24 | C22 | C23 | F3   | -60.0(3)  |
| C10  | C19 | C20 | C13 | 1.6(5)      | C24 | C22 | C23 | F4   | 179.2(3)  |
| C10  | C19 | C20 | C28 | -176.9(4)   | C25 | C15 | C16 | C17  | 1.2(4)    |
